# Supplementary material for: Effect of an online healthy lifestyle psychoeducation programme to improve cardiometabolic outcomes and affective symptoms in youth receiving mental health care: study protocol for a pilot clinical trial
Source: PubMed Central journal article supplement — BMJ Open. 2021 Jun 29;11(6):e044977. doi: 10.1136/bmjopen-2020-044977 (PMC8245471; doi:10.1136/bmjopen-2020-044977), 2021-06-29
Supplement: bmjopen-2020-044977.draft_revisions.pdf [file bmjopen-2020-044977.draft_revisions.pdf]

# BMJ Open

BMJ Open is committed to open peer review. As part of this commitment we make the peer review history of every article we publish publicly available.

When an article is published we post the peer reviewers' comments and the authors' responses online. We also post the versions of the paper that were used during peer review. These are the versions that the peer review comments apply to.

The versions of the paper that follow are the versions that were submitted during the peer review process. They are not the versions of record or the final published versions. They should not be cited or distributed as the published version of this manuscript.

BMJ Open is an open access journal and the full, final, typeset and author-corrected version of record of the manuscript is available on our site with no access controls, subscription charges or pay-per-view fees (<http://bmjopen.bmj.com>).

If you have any questions on BMJ Open's open peer review process please email [info.bmjopen@bmj.com](mailto:info.bmjopen@bmj.com)

# BMJ Open

**The effect of an online healthy lifestyle psychoeducation program to improve cardiometabolic outcomes and affective symptoms in youth receiving mental health care: study protocol for a clinical trial.**

|                               |                                                                                                                                                                                                                                                                                                                                                                                                                                                                                                                                                                                                                                                             |
|-------------------------------|-------------------------------------------------------------------------------------------------------------------------------------------------------------------------------------------------------------------------------------------------------------------------------------------------------------------------------------------------------------------------------------------------------------------------------------------------------------------------------------------------------------------------------------------------------------------------------------------------------------------------------------------------------------|
| Journal:                      | <i>BMJ Open</i>                                                                                                                                                                                                                                                                                                                                                                                                                                                                                                                                                                                                                                             |
| Manuscript ID                 | bmjopen-2020-044977                                                                                                                                                                                                                                                                                                                                                                                                                                                                                                                                                                                                                                         |
| Article Type:                 | Protocol                                                                                                                                                                                                                                                                                                                                                                                                                                                                                                                                                                                                                                                    |
| Date Submitted by the Author: | 18-Sep-2020                                                                                                                                                                                                                                                                                                                                                                                                                                                                                                                                                                                                                                                 |
| Complete List of Authors:     | Wilson, Chloe; The University of Sydney Brain and Mind Centre<br>Nichles, Alissa; The University of Sydney Brain and Mind Centre, Brain and Mind Centre<br>Zmicerevska, Natalia; The University of Sydney Brain and Mind Centre<br>Carpenter, Joanne; University of Sydney Brain and Mind Research Institute, ;<br>Song, Yun; The University of Sydney, Brain and Mind Centre<br>McHugh, Catherine; The University of Sydney,<br>Hamilton, Blake; The University of Sydney, Brain and Mind Centre<br>Scott, Elizabeth; The University of Sydney Brain and Mind Centre<br>Hickie, Ian; The University of Sydney Brain and Mind Centre, Brain and Mind Centre |
| Keywords:                     | MENTAL HEALTH, MEDICAL EDUCATION & TRAINING, Child & adolescent psychiatry < PSYCHIATRY, Depression & mood disorders < PSYCHIATRY, Schizophrenia & psychotic disorders < PSYCHIATRY, PUBLIC HEALTH                                                                                                                                                                                                                                                                                                                                                                                                                                                          |
|                               |                                                                                                                                                                                                                                                                                                                                                                                                                                                                                                                                                                                                                                                             |

SCHOLARONE™  
Manuscripts

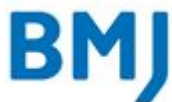

I, the Submitting Author has the right to grant and does grant on behalf of all authors of the Work (as defined in the below author licence), an exclusive licence and/or a non-exclusive licence for contributions from authors who are: i) UK Crown employees; ii) where BMJ has agreed a CC-BY licence shall apply, and/or iii) in accordance with the terms applicable for US Federal Government officers or employees acting as part of their official duties; on a worldwide, perpetual, irrevocable, royalty-free basis to BMJ Publishing Group Ltd ("BMJ") its licensees and where the relevant Journal is co-owned by BMJ to the co-owners of the Journal, to publish the Work in this journal and any other BMJ products and to exploit all rights, as set out in our [licence](#).

The Submitting Author accepts and understands that any supply made under these terms is made by BMJ to the Submitting Author unless you are acting as an employee on behalf of your employer or a postgraduate student of an affiliated institution which is paying any applicable article publishing charge ("APC") for Open Access articles. Where the Submitting Author wishes to make the Work available on an Open Access basis (and intends to pay the relevant APC), the terms of reuse of such Open Access shall be governed by a Creative Commons licence – details of these licences and which [Creative Commons](#) licence will apply to this Work are set out in our licence referred to above.

Other than as permitted in any relevant BMJ Author's Self Archiving Policies, I confirm this Work has not been accepted for publication elsewhere, is not being considered for publication elsewhere and does not duplicate material already published. I confirm all authors consent to publication of this Work and authorise the granting of this licence.

1  
2  
3 **Title:** The effect of an online healthy lifestyle psychoeducation program to improve  
4  
5 cardiometabolic outcomes and affective symptoms in youth receiving mental health  
6  
7 care: study protocol for a clinical trial.  
8  
9

10  
11  
12  
13  
14 **Authors:** Chloe E. Wilson, Alissa Nichles, Natalia Zmicerevska, Joanne S. Carpenter,  
15  
16 Yun Song, Cate McHugh, Blake Hamilton, Elizabeth Scott, Ian B. Hickie.  
17  
18

19  
20  
21 Youth Mental Health and Technology Team, Brain and Mind Centre, University of  
22  
23 Sydney, Sydney, NSW, Australia.  
24  
25

26 \*Corresponding author: Chloe Wilson ([chloe.wilson@sydney.edu.au](mailto:chloe.wilson@sydney.edu.au))  
27  
28  
29  
30  
31  
32

33 Word Count: 3963 (without Abstract and References)  
34  
35  
36  
37  
38  
39  
40  
41  
42  
43  
44  
45  
46  
47  
48  
49  
50  
51  
52  
53  
54  
55  
56  
57  
58  
59  
60

## Abstract

### Introduction

Worsened cardiometabolic profiles in youth with mental ill-health have been associated with a number of modifiable lifestyle risk factors. It is becoming increasingly evident that clinical interventions need to be multi-modal in focus to improve not only mental health symptoms, but also the physical health symptoms in this already at-risk cohort.

### Methods and Analysis:

This 12-week clinical trial examines the efficacy of an adjunctive online psychoeducation program for improving cardiometabolic risk parameters and affective symptoms in a transdiagnostic sample of at least 44 young people aged 16-30 who are concurrently receiving standard clinical care for clinically diagnosed anxiety, affective and/or psychotic disorders. Individuals will be invited to participate in a structured online psychoeducation program incorporating nutritional, physical activity, sleep-wake and healthy lifestyle information, delivered fortnightly over 6 online modules. Participants will undergo a series of assessments including: (1) blood tests to assess metabolic markers; (2) anthropometric assessments (blood pressure, height, weight and waist circumference); (3), self-report and clinician administered assessments determining diagnosis and symptomatology; and (4) sleep-wake behaviours and circadian rhythm assessments. Correlations and change in mean scores for all of the cardiometabolic and affective measures will be assessed after completion of the clinical trial via paired samples t-tests and Pearson's correlations.

## Ethics and Dissemination

The results of this clinical trial will be disseminated into the scientific and broader community through peer-reviewed journals and conference presentations.

## Trial Registration

Australian New Zealand Clinical Trials Registry (ANZCTR) Number: ACTRN12620000772943, Date 28 August, 2020.

## Strengths and Limitations of this Study

- Young people receiving mental health care can participate in this clinical trial assessing the effect of an adjunctive online psychoeducation program for improving cardiometabolic risk parameters and affective symptoms.
- The psychoeducation program involves structured nutrition, physical activity, sleep-wake and healthy lifestyle information.
- Participants will be assessed on a range of metabolic, anthropometric, sleep-wake and mental health symptoms throughout the trial.
- Online psychoeducation modules allow participants to access the information remotely.

## Keywords:

Mental ill-health, psychoeducation, cardiometabolic improvement, physical activity.

## Introduction

Premature mortality in those with severe mental illness has been well documented<sup>1-6</sup>, with diabetes and premature cardiovascular disease comprising some of the leading causes of premature mortality and morbidity in this cohort. Increased body mass index (BMI) and weight gain have been identified as key modifiable risk factors causing premature mortality and morbidity in young people with mood disorders, along with poor sleep-wake cycle regulation<sup>7-9</sup>, physical inactivity<sup>10-16</sup>, poor dietary habits<sup>10 17-20</sup> and smoking<sup>21-26</sup>.

Whilst many mental disorders can be managed with psychotherapy alone, psychotropic medications including antipsychotics, antidepressants and mood stabilisers are used for the treatment of a number of psychotic, mood and behavioural disorders in youth<sup>27 28</sup>. Adolescents initiating psychotropic medications may display heterogeneous side effects with some very complex long-term cardiometabolic side effects<sup>29-32</sup>. Of particular concern, is the weight-gain associated with second-generation antipsychotic (SGA) usage<sup>29 33-37</sup> which is acute and can often be observed within 12 weeks of medication initiation<sup>38-43</sup>. Children and adolescents appear to be at a greater risk of psychotropic-induced weight gain than adults<sup>44 45</sup> and the younger the age of the child, the higher the mitigating risk<sup>37</sup>. Psychotropic medication induced weight gain is a noteworthy adverse drug reaction as it mediates the development of other more severe cardiometabolic outcomes<sup>38-43</sup>.

Lifestyle interventions are an effective non-pharmacological intervention option to manage drug-induced cardiometabolic disturbances in patients with psychiatric disorders. The World Health Organisation guidelines recommend lifestyle behavioural

1  
2  
3 interventions as a first-line treatment for physical health symptoms (including the  
4 cardiometabolic health) of adults with severe mental illness <sup>46</sup>. The benefits of lifestyle  
5 and behavioural interventions on weight loss in obesity and for prevention of Type II  
6 Diabetes Mellitus (T2DM) are well-established <sup>47 48</sup>. Additionally, psychoeducational  
7 interventions focusing on healthy lifestyle habits including diet, physical activity and  
8 sleep-wake practices have been shown to ameliorate both the physical and mental  
9 health concerns of young people with psychiatric disorders <sup>49-53</sup>.

10  
11  
12  
13  
14  
15  
16  
17  
18  
19  
20  
21 Face-to-face psychoeducation interventions for adults with severe mental illness are  
22 able to demonstrate significant improvements in weight <sup>54</sup>; depressive symptoms,  
23 sleep quality and nutrition; <sup>55</sup> and other cardiometabolic risk factors <sup>56</sup>. Existing web-  
24 based psychoeducation intervention studies on adults with mental illness have  
25 demonstrated improvements in depression and anxiety symptoms <sup>57</sup>, and increases  
26 in objective physical activity levels <sup>58</sup>, however have not measured cardiometabolic  
27 risk factors objectively. In youth, the literature in this field is more limited, with existing  
28 or planned studies in youth cohorts measuring psychological symptom improvements  
29 only <sup>59-61</sup>.

30  
31  
32  
33  
34  
35  
36  
37  
38  
39  
40  
41  
42  
43  
44  
45 We are seeking to investigate the effect of an online healthy lifestyle psychoeducation  
46 program targeted towards improving objective cardiometabolic outcomes in young  
47 people with clinically diagnosed affective or psychotic disorders. Web-based  
48 interventions provide an alternative to traditional face-to-face interventions. The need  
49 for online programs is especially evident with the COVID-19 global pandemic impeding  
50 on young people's ability to seek face-to-face support. This has given rise to a need  
51 to develop more comprehensive resources tailored to the specific risk-factors of this  
52  
53  
54  
55  
56  
57  
58  
59  
60



1  
2  
3 cohort in an easily accessible online format. Where effective, it would allow the  
4  
5 program to be implemented remotely, to many individuals who may not be able to  
6  
7 access in-person services.  
8  
9

## 10 11 12 **Methods and Analysis**

### 13 14 **Design and Structure**

15  
16 This is a one-arm longitudinal clinical trial. The duration of the clinical trial is 12 weeks.  
17  
18 All participants will engage in a self-directed online 12-week psychoeducation  
19  
20 program. This psychoeducation program will involve structured nutritional, physical  
21  
22 activity, sleep-wake and general healthy lifestyle information based on the Australian  
23  
24 Guidelines of Physical Activity, the Australian Guide to Healthy Eating, and previously  
25  
26 published research, delivered for approximately 1 hour each fortnight over 6 online  
27  
28 workshops (week 1, 3, 5, 7, 9, and 11). The modules have been developed in  
29  
30 conjunction with those with a lived experience of mental illness to ensure the suitability  
31  
32 and relevance for this cohort. Participants will be given a link to access the online  
33  
34 psychoeducation modules in their own time. These modules will cover the topics  
35  
36 shown in Table 1.  
37  
38  
39  
40  
41  
42  
43  
44  
45  
46  
47  
48  
49  
50  
51  
52  
53  
54  
55  
56  
57  
58  
59  
60

**Table 1.** Psychoeducation modules

| Session                                                         | Topics to be covered                                                                                                                                                                                                                                                                                                                                                                                                                              |
|-----------------------------------------------------------------|---------------------------------------------------------------------------------------------------------------------------------------------------------------------------------------------------------------------------------------------------------------------------------------------------------------------------------------------------------------------------------------------------------------------------------------------------|
| 1. Brain and Body Connection                                    | <ul style="list-style-type: none"> <li>- How the brain and body are connected</li> <li>- Establishing a healthy mindset</li> </ul>                                                                                                                                                                                                                                                                                                                |
| 2. Body Clock and Sleep-Wake Cycle Regulation for mental health | <ul style="list-style-type: none"> <li>- Importance of the brain and body clock and sleep-wake cycle regulation</li> <li>- How the brain and body clock coordinates all the biological systems</li> <li>- Healthy sleep-wake behaviours</li> <li>- How lifestyle factors and behaviours influence the brain and body clock e.g. exercise, light exposure, sleep environment, sleep regularisation, naps, foods, stress, anxiety, mood.</li> </ul> |
| 3. Physical activity for mental health (part 1)                 | <ul style="list-style-type: none"> <li>- Benefits of physical activity for physical and mental health</li> <li>- Outline of Australian Physical Activity Guidelines</li> <li>- Barriers to engaging in physical activity</li> <li>- Increasing incidental activity, reducing sitting time</li> </ul>                                                                                                                                              |
| 4. Physical activity for mental health (part 2)                 | <ul style="list-style-type: none"> <li>- Working out anywhere</li> <li>- Finding the motivation</li> <li>- Concept of energy in vs energy out</li> </ul>                                                                                                                                                                                                                                                                                          |
| 5. Nutrition for mental health (part 1)                         | <ul style="list-style-type: none"> <li>- Energy in vs energy out and introducing the concept of a calorie</li> <li>- Outline of Australian Dietary Guidelines</li> <li>- Standard serving sizes/portion sizes</li> </ul>                                                                                                                                                                                                                          |
| 6. Nutrition for mental health (part 2)                         | <ul style="list-style-type: none"> <li>- Timing of meals</li> <li>- Snacking</li> <li>- Meal preparation</li> <li>- Making healthy choices when eating out at restaurants</li> <li>- Managing comfort eating.</li> </ul>                                                                                                                                                                                                                          |

During week 6, participants will receive a monitoring phone call to help in the participant's engagement and ongoing participation. At the completion of all 6 modules the participant will be asked to provide feedback about the program and to share their overall satisfaction with the program via an online questionnaire.

Participants will be asked to wear an actigraph (GENEActiv Sleep device; Activinsights, Kimbolton, UK) on the non-dominant wrist to collect 24-hour sleep-wake and physical activity parameters during weeks 1-2, 6-7 and 10-12. Blood tests to measure metabolic markers, anthropometric assessments (blood pressure, height, weight and waist circumference), self-report and clinician administered assessments to assess various mental illness symptoms and physical activity engagement will be conducted in weeks 1 and 12. Most of these self-report and clinician administered assessments are part of the standardised assessment battery developed for the Youth

Mental Health Tracker as part of the Brain and Mind Centre multidimensional framework<sup>62</sup>. The schedule of enrolment, interventions and assessment time points can be seen in Table 2.

**Table 2.** Schedule of enrolment, interventions and assessment time points.

| Study Procedures                             | Study Week |   |   |   |   |   |   |    |    |   |
|----------------------------------------------|------------|---|---|---|---|---|---|----|----|---|
|                                              | 1          | 2 | 3 | 5 | 6 | 7 | 9 | 11 | 12 |   |
| <b>Informed Consent</b>                      | x          |   |   |   |   |   |   |    |    |   |
| <b>Enrolment</b>                             | x          |   |   |   |   |   |   |    |    |   |
| <b>Psychoeducation Session</b>               | x          |   | x | x |   | x | x | x  |    |   |
| <b>Actigraphy</b>                            | x          |   |   |   | x |   |   | x  |    |   |
| <b>Self-Report Questionnaires</b>            | x          |   |   |   |   |   |   |    |    | x |
| <b>Clinician Administered Questionnaires</b> | x          |   |   |   |   |   |   |    |    | x |
| <b>Blood Collection</b>                      | x          |   |   |   |   |   |   |    |    | x |
| <b>Anthropometrics</b>                       | x          |   |   |   |   |   |   |    |    | x |

### Setting, Recruitment and Informed Consent

This is a multi-site, transdiagnostic intervention study, with the Brain and Mind Centre (including *headspace* Camperdown, and Early Intervention and High Intensity Services; public health organisation) at the University of Sydney (Sydney, Australia), being the lead site for this study. Further, St Vincent's Private Hospital (USpace) (private health organisation) will be another participating site in Sydney, Australia. Thus, this study involves both specialist (USpace) and enhanced primary-care (*headspace* Camperdown, and Early Intervention and High Intensity Services) youth mental health services.

Potential participants will be identified as young people aged between 16 and 30 years of age presenting to youth mental health clinics. Treating clinicians will be made aware

1  
2  
3 of the study and eligibility criteria and will identify patients presenting for care at these  
4 services who may be eligible for the study. With the patient's permission, the clinicians  
5 will pass on the contact details to the study research team, who will make further  
6 contact and initiate the informed consent process. The study staff will then obtain  
7 written informed consent from the young person to participate in the psychoeducation  
8 program.

### 17 **Selection Criteria**

19 Young people will be invited into the trial based on the following inclusion criteria: (i)  
20 aged between 16 and 30; (ii) receiving mental health care at one of the participating  
21 sites; (iii) body mass index (BMI)  $\geq 25$ ; (iv) willing and able to give independent written  
22 informed consent to participate in the study.

23 The exclusion criteria are: (i) current diagnosis or history of an eating disorder (via the  
24 Structured Clinical Interview for DSM-V Disorders (SCID)<sup>63</sup>); (ii) intellectual disability  
25 (at the discretion of a clinical psychologist or psychiatrist); (iii) major neurological  
26 disorder, medical illness which impacts on cognition, and/or a history of sustained  
27 head injury; (iv) not proficient in English; or (v) acute psychotic or manic episode that  
28 impairs the individual's ability to give informed consent and/or requires acute clinical  
29 treatment.

### 47 **Study Objectives**

49 **Primary** To determine the efficacy of an online 12-week healthy lifestyle  
50 psychoeducation program in improving cardiometabolic parameters (fasting insulin,  
51 fasting glucose, the updated homeostatic model assessment (HOMA2 IR),  
52 cholesterol, blood pressure, BMI and waist circumference) of young people seeking  
53 treatment for mental health related issues.

1  
2  
3 **Secondary** To determine the efficacy of an online 12-week healthy lifestyle  
4 psychoeducation program in improving affective symptoms of young people seeking  
5 treatment for mental health related issues.  
6  
7

8  
9  
10 **Tertiary** To determine if changes in cardiometabolic health risk factors are associated  
11 with changes in depressive and anxiety symptom severity.  
12  
13  
14

## 15 16 17 **Measures**

18  
19 Primary and secondary outcome measures have been established as follows:  
20

### 21 **Primary Outcome Measures**

- 22  
23  
24 i. **Insulin resistance:** Insulin resistance will be estimated using the updated  
25 homeostatic model assessment (HOMA2-IR) using iHOMA2 software V.8.8  
26  
27  
28 <sup>64</sup> from fasting blood test results.  
29

### 30 **Secondary Outcome Measures**

#### 31 **Clinician Rated Assessments**

- 32  
33  
34  
35 i. **Diagnostic Assessment:** The presence of any DSM-V Disorders will be  
36 assessed using the Structured Clinical Interview for DSM-V Disorders  
37  
38 (SCID)<sup>63</sup>.  
39  
40  
41  
42 ii. **Physical Health, Mental Health, Family Health and Treatment History:**  
43 Current and past health history will be assessed and recorded by trained  
44  
45 researchers and study doctors.  
46  
47  
48  
49 iii. **The Brief Psychiatric Rating Scale (BPRS)** <sup>65</sup>: The BPRS measures  
50  
51 psychiatric symptoms including depression, anxiety, hallucinations and  
52  
53 unusual behaviour. This scale is one of the most widely used scales to  
54  
55 measure psychotic symptoms <sup>66</sup>.  
56  
57  
58  
59  
60

- 1  
2  
3  
4  
5  
6  
7  
8  
9  
10  
11  
12  
13  
14  
15  
16  
17  
18  
19  
20  
21  
22  
23  
24  
25  
26  
27  
28  
29  
30  
31  
32  
33  
34  
35  
36  
37  
38  
39  
40  
41  
42  
43  
44  
45  
46  
47  
48  
49  
50  
51  
52  
53  
54  
55  
56  
57  
58  
59  
60
- iv. Clinical Staging<sup>67</sup>: This framework classifies individuals according to the presentation of their mental illness from those in the earliest phases with non-specific clinical presentations (stages 1a 'seeking help'), those at greater-risk with more specific, sub-threshold presentations (stage 1b 'attenuated syndromes') and those who have already reached a threshold for a progressive or recurrent disorder meeting diagnostic criteria (stage 2, 3, or 4)<sup>67-70</sup>.
  - v. Pathophysiological Mechanisms<sup>71</sup>: The pathophysiological model suggests three possible pathways of illness: (i) neuro-developmental impairments, (ii) circadian dysregulation, and (iii) heightened sensitivity (i.e., stress-reactivity) in the "fear" circuitry. Based on these pathways, three clinical phenotype labels will be assigned to the individual: (i) developmental-psychotic, (ii) mania-fatigue, and (iii) anxiety-depression subtypes.
  - vi. Clinical Global Impression (CGI)<sup>72</sup>: The CGI provides an indication of the patient's ability to function in context of their history, psychosocial circumstances, symptoms, and behaviour. The CGI comprises two one-item measures evaluating the severity of psychopathology from 1 to 7 (CGI-Severity, CGI-S) and the change from the initiation of treatment on a similar seven-point scale (CGI-Improvement, CGI-I).
  - vii. The Young Mania Rating Scale (YMRS)<sup>73</sup>: The YMRS is an eleven-item questionnaire measuring manic episode severity based on patient subjective report and clinical observations during the clinical interview.
  - viii. The Simple Physical Activity Questionnaire (SIMPAQ)<sup>74</sup>: The SIMPAQ is a five-item clinical tool designed to assess the degree of physical activity in cohorts at high risk of sedentary behaviour. This measure has been used in

1  
2  
3 over 23 countries and can be reliability and validly administered by health  
4 professionals <sup>75</sup>.

- 5  
6  
7  
8 ix. *Suicidal ideation and behaviour*: Acute suicidal behaviour will be assessed  
9  
10 by item 7.3 of the Comprehensive Assessment of At-Risk Mental States  
11 (CAARMS) <sup>76</sup>. The CAARMS is a semi-structured assessment tool designed  
12 to evaluate those at ultra-high risk for psychosis. This assessment is only to  
13 be administered as a safety measure where the self-report Suicidal Ideation  
14 Attributes Scale (SIDAS) score reaches the cut off score of  $\geq 21$  indicating  
15 a high risk of suicidal behaviour.  
16  
17  
18  
19  
20  
21  
22  
23  
24 x. *Social and Occupational Assessment Scale (SOFAS) (38)*: The SOFAS is  
25 a global rating of the participant's current social and occupational  
26 functioning, independent of the overall severity of the individual's  
27 psychological symptoms, ranging from 0 to 100, with lower scores indicating  
28 poorer functioning. The SOFAS has been used extensively in clinical  
29 research and practice and has good construct validity, interrater reliability,  
30 and predictive validity <sup>77 78</sup>.  
31  
32  
33  
34  
35  
36  
37  
38  
39  
40 xi. *Eating Disorder Examination (EDE)* <sup>79 80</sup>: This structured interview assesses  
41 a range of current regular use of eating disorder behaviours, namely binge  
42 eating, purging and strict dieting or fasting. This interview has demonstrated  
43 good internal consistency and construct validity <sup>81</sup>.  
44  
45  
46  
47  
48  
49  
50

### 51 **Self-Report Questionnaires:**

- 52  
53  
54 i. *Demographics*: This questionnaire will comprise details on basic  
55 demographics (including details of work and education, ethnicity, living  
56  
57  
58  
59  
60

- 1  
2  
3 circumstances, relationship status), and physical health (height, weight and  
4 waist circumference).  
5  
6  
7
- 8 ii. Kessler Psychological Distress Scale (K-10) <sup>82 83</sup>: The K-10 is a 10-item  
9  
10 version of the Kessler scale that provides a global measure of distress  
11 based on anxiety and depressive symptoms over a four-week period. It has  
12 high predictive validity and reliability <sup>84</sup>.  
13  
14
- 15 iii. International Physical Activity Questionnaire (IPAQ) - short version <sup>85 86</sup>: The  
16  
17 short version of the International Physical Activity Questionnaires (IPAQ) is  
18 a seven-item questionnaire calculating the amount of time spent engaging  
19 in sedentary activity; mild, moderate, or vigorous-intensity physical activity.  
20 The original IPAQ has been tested across populations and broad age  
21 groups and demonstrates good reliability and validity <sup>85</sup>.  
22  
23
- 24 iv. Somatic and Psychological Health Report (SPHERE 12) <sup>87</sup>: The SPHERE  
25  
26 12 is a 12-item self-report questionnaire that assesses six psychological  
27 (PSYCH subscale) and six physical symptoms (SOMA subscale) to identify  
28 anxiety, depression, and somatisation symptoms in primary care. The  
29 SPHERE-12 has been demonstrated to have high reliability and validity in  
30 populations over the age of 16 <sup>87</sup>.  
31  
32
- 33 v. Sleep-wake cycle and chronotype: Six questions will be asked concerning  
34  
35 time falling asleep, waking up during weekdays and weekends, hours of  
36 sleep, feelings when waking up. Sleep timing items are based on the  
37 Pittsburgh Sleep Quality Index (PSQI)<sup>88</sup>, and Munich Chrono Type  
38 Questionnaire (MCTQ) <sup>89</sup>, while sleep quality items were developed based  
39 on expert agreement in existing literature.  
40  
41  
42  
43  
44  
45  
46  
47  
48  
49  
50  
51  
52  
53  
54  
55  
56  
57  
58  
59  
60



- 1  
2  
3 vi. Pittsburgh Sleep Quality Index (PSQI)<sup>88</sup>: The PSQI is a 24-item self-report  
4 questionnaire measuring the quality and patterns of sleep. Seven domains  
5 are assessed including subjective sleep quality, sleep latency, sleep  
6 duration, habitual sleep efficiency, sleep disturbances, use of sleeping  
7 medications, and daytime dysfunction over the last month. This scale has  
8 good internal consistency and construct validity<sup>90 91</sup>.  
9  
10  
11  
12  
13  
14  
15  
16  
17 vii. The Insomnia Severity Index (ISI)<sup>92</sup>: The ISI comprises seven items  
18 assessing the perceived severity of difficulties in initiating sleep, staying  
19 asleep, early morning awakenings, satisfaction with current sleep pattern,  
20 interference with daily functioning, noticeability of impairment attributed to  
21 the sleep problem, and degree of distress or concern caused by the sleep  
22 problem. This scale has been used widely in clinical research with high  
23 internal consistency and convergent validity<sup>93</sup>.  
24  
25  
26  
27  
28  
29  
30  
31  
32  
33 viii. Suicidal Ideation Attributes Scale (SIDAS)<sup>94</sup>: The SIDAS is a five-item self-  
34 report questionnaire assessing the frequency, controllability, closeness to  
35 attempt, distress, and interference with daily activities over the past month.  
36 The SIDAS has demonstrated high internal consistency and good  
37 convergent validity<sup>95</sup>.  
38  
39  
40  
41  
42  
43  
44  
45 ix. Quick Inventory of Depressive Symptomatology – self-report (QIDS-SR)<sup>96</sup>:  
46 The QIDS is a rating scale that assesses the nine criterion symptom  
47 domains (sleep, sad mood, appetite/weight, concentration/ decision  
48 making, self-view, thoughts of death or suicide, general interest, energy  
49 level, and restlessness/agitation) designated by the DSM-IV to diagnose a  
50 major depressive episode. This scale has high internal consistency and  
51 good predictive and concurrent validity<sup>97</sup>.  
52  
53  
54  
55  
56  
57  
58  
59  
60

- 1  
2  
3  
4  
5  
6  
7  
8  
9  
10  
11  
12  
13  
14  
15  
16  
17  
18  
19  
20  
21  
22  
23  
24  
25  
26  
27  
28  
29  
30  
31  
32  
33  
34  
35  
36  
37  
38  
39  
40  
41  
42  
43  
44  
45  
46  
47  
48  
49  
50  
51  
52  
53  
54  
55  
56  
57  
58  
59  
60
- x. Overall Anxiety Severity Impairment Scale (OASIS) <sup>98</sup>: The OASIS is a five-item self-report measure used to assess the frequency and intensity of anxiety symptoms and the functional impairment associated with any anxiety disorder or multiple anxiety disorders. This scale has excellent test-retest reliability, and convergent and discriminant validity <sup>99</sup>.
  - xi. World Health Organisation (WHO) Alcohol, Smoking and Substance Involvement Screening Test (WHO-ASSIST) <sup>100 101</sup>: The ASSIST (version 3.1) is an eight-item questionnaire screening for use of tobacco products, alcohol, cannabis, cocaine, amphetamine-type stimulants (ATS), sedatives and sleeping pills (benzodiazepines), hallucinogens, inhalants, opioids, 'other' drugs. This scale has demonstrated good validity <sup>102</sup> and reliability <sup>103</sup>.
  - xii. Alcohol Use Disorders Identification Test – Consumption (AUDIT-C) <sup>104</sup>: The AUDIT-C has three short questions to estimate alcohol consumption in a standard, meaningful and non-judgemental manner. This scale has shown good reliability and validity in adolescent sample groups <sup>105</sup>.
  - xiii. Rosenberg Self-Esteem Scale (RSES) <sup>106</sup>: The RSES is a 10-item self-report measure of self-esteem, self-worth or self-acceptance designed specifically for use in adolescent populations. Higher scores on this scale indicate higher levels of global self-esteem. This scale has extremely high internal consistency and demonstrated construct validity with other measures of self-esteem <sup>107 108</sup>.
  - xiv. Client Satisfaction Questionnaire-8 (CSQ-8) <sup>109</sup>: The CSQ is a structured survey used to assess level of satisfaction with care. The CSQ-8 has been

1  
2  
3 found to have high internal consistency and concurrent validity in mental  
4 health outpatient settings <sup>109</sup>.

- 5  
6  
7  
8 xv. Feedback Questionnaire. This is an investigator-developed questionnaire  
9 specifically relating to the efficacy of the psychoeducation program and  
10 whether the participants have any feedback or suggestions for improvement  
11 to the online psychoeducation program.  
12  
13  
14  
15  
16  
17  
18

### 19 **Blood Markers**

20  
21 Participants will be required to undergo blood sample collection at baseline and week  
22 12 to determine variables of interest including fasting glucose; fasting insulin, and  
23 blood lipids (including total, high density lipoprotein (HDL) and low-density lipoprotein  
24 (LDL) cholesterol levels). Other blood measures to be collected for monitoring  
25 purposes include HbA1c, full blood count, urea, electrolytes, liver function test, C-  
26 reactive protein (CRP), erythrocyte sedimentation rate (ESR), antinuclear antibodies  
27 (ANA), vitamin D, vitamin B12, folate, iron, thyroid stimulating hormone, calcium (Ca),  
28 magnesium (Mg) and phosphate (PO<sub>4</sub>) levels. Blood samples are to be collected in a  
29 fasting state by a trained phlebotomist.  
30  
31  
32  
33  
34  
35  
36  
37  
38  
39  
40  
41  
42  
43  
44

### 45 **Anthropometric assessments**

46  
47 Measures of blood pressure, height and weight will be collected from direct  
48 measurement by a clinician or research staff. Body mass index (BMI) will be calculated  
49 using the formula:  $\text{weight(kg)} \div \text{height(m)}^2$ . Waist circumference is measured with the  
50 participant standing up, to the nearest 1 cm with a measuring tape at the midpoint  
51 between the bottom of the rib cage and above the top of the iliac crest (hip bone) at  
52 the end of the participant's normal respiration. Where the patient is unable to visit the  
53  
54  
55  
56  
57  
58  
59  
60

1  
2  
3 Brain and Mind Centre for an anthropometric assessment, the participant will be  
4 required to self-report height and weight and will be instructed how to gather waist  
5 circumference measurements.  
6  
7  
8  
9

## 10 11 12 **24-hour sleep-wake and physical activity profiling**

13  
14 All participants will wear wrist mounted actigraphy recording devices (GENEActiv  
15 Sleep device; Activinsights, Kimbolton, UK) to estimate sleep and physical activity  
16 patterns based on validated algorithms. Measurements include sleep onset time,  
17 sleep offset time, sleep midpoint, sleep efficiency, wake after sleep onset (WASO:  
18 number of minutes during the sleep period scored as awake), and total sleep time  
19 (TST; number of minutes during the sleep period scored as sleep).  
20  
21  
22  
23  
24  
25  
26  
27

28 Physical activity will be assessed through the GENEActiv devices as gross motor  
29 activity per day (milli-gravity [mg],  $1g = 9.81 \text{ m/s}^2$  ) and minutes in  
30 moderate-to-vigorous physical activity per day (objective minutes in  
31 moderate-to-vigorous physical activity per day defined as the sum of 1-min epochs in  
32 which gross motor activity was larger than 125 mg) as described in other studies <sup>110</sup>.  
33  
34  
35  
36  
37  
38  
39  
40  
41  
42  
43  
44  
45  
46  
47  
48  
49  
50  
51  
52  
53  
54  
55  
56  
57  
58  
59  
60  
The GENEActiv devices have been used widely in clinical research and validated  
against several types of accelerometry-based activity monitors <sup>111-114</sup> as well as for  
sleep-wake scoring <sup>115 116</sup>.

## 51 52 53 **Patient and Public Involvement**

54  
55  
56  
57  
58  
59  
60  
Patients or the public were not involved in the design, or conduct, or reporting, or  
dissemination plans of our research.

## Sample Size/ Power Calculation

The proposed sample size calculation of at least 44 participants is based on specific power analysis parameters (power analyses completed in G\*Power Version 3.1.9.4), notably difference in means in HOMA2-IR scores of one sample with a power of 0.90, an effect size of 0.5, and an alpha level of 0.05. Whilst this is a feasibility study, and a sample size has been estimated, this pilot data will be used to inform power calculations for future studies investigating similar outcome measures in this specific cohort.

## Data Analysis Plan

All data will be entered into a secure database and statistical analyses conducted in R statistical software. The primary and secondary objectives will be analysed by a change in mean scores of all outcome measures after completion of the 12-week online psychoeducation program via a paired samples t-test, with significance levels set at  $\alpha=.05$ . To assess the tertiary outcome measure, correlations will be performed between all cardiometabolic change scores and affective outcome change scores via Pearson's or Spearman's correlations tests based on normative or non-normative data distribution; with a significance level set at  $\alpha=.05$ .

## Ethics and Dissemination

The Sydney Local Health District (RPAH Division) Human Ethics Research (HREC) Committee has approved this study (X20-0228). The online psychoeducation program

1  
2  
3 is designed as an adjunct, not an alternative, to standard clinical treatments offered  
4 by the youth mental health services. As such, all participants are encouraged to  
5 continue to follow the healthcare advice of their treating clinicians and to remain in  
6 their care, as well as participating in the online psychoeducation sessions. This  
7 standard treatment may include medication, counselling, psychological therapy and/or  
8 referrals to a range of specialist mental health treatments or services.  
9  
10  
11  
12  
13  
14  
15  
16  
17  
18

19 In accordance with the guidelines stipulated by the funding bodies, the results of this  
20 study will be disseminated as widely as possible into the scientific and broader  
21 community. This will include publication in peer-reviewed journals, scholarly book  
22 chapters, presentation at conferences and publication in conference proceedings. In  
23 accordance with NHMRC policy, publications arising from this study will be deposited  
24 into an open access institutional repository, where possible. Results will also be  
25 disseminated into the wider community in a format appropriate for a lay audience,  
26 through links including the BMC website and social media, as well as newsletters.  
27  
28  
29  
30  
31  
32  
33  
34  
35  
36  
37  
38  
39

## 40 **Discussion**

41  
42 This trial plans to examine the efficacy of an online psychoeducation program on  
43 several cardiometabolic risk factors and affective symptoms in youth seeking  
44 treatment for mental ill-health. The modules feature a youth-friendly format, with input  
45 from those with lived experience, to maximise engagement by young people. If the  
46 findings of this exploratory trial demonstrate benefits in the targeted domains, it will be  
47 used as a basis for further clinical trials incorporating more intensive psychoeducation  
48 combined with pharmacological therapies. Due to the online nature of the  
49 psychoeducation program, there is also potential for a larger-scale study to be  
50  
51  
52  
53  
54  
55  
56  
57  
58  
59  
60

1  
2  
3 implemented across a number of centres nationally, allowing individuals to access the  
4  
5 program remotely and regionally.  
6  
7  
8  
9

### 10 **Trial Status**

11  
12 The trial has not begun recruitment.  
13  
14  
15

### 16 **Funding**

17  
18 This project is an investigator-initiated study and supported by philanthropic funding,  
19  
20 for which donor(s) are families affected by mental illness who wish to remain  
21  
22 anonymous. This study was also partially funded by a philanthropic PhD scholarship  
23  
24 (The Liu McCabe Family Scholarship awarded to C.E.W), a National Health & Medical  
25  
26 Research Council Australia Fellowship (No. 511921, awarded to I.B.H) and a  
27  
28 philanthropic fellowship (the Caroline Quinn Research Grant awarded to J.S.C). The  
29  
30 funders of this study had no involvement in the: study design; collection, analysis and  
31  
32 reporting of the data; writing of the report; or decision to submit the paper for  
33  
34 publication.  
35  
36  
37  
38  
39  
40  
41  
42

### 43 **Author's Contributions**

44  
45 C.E.W. has developed this clinical trial as part of her PhD research project and drafted  
46  
47 this original manuscript with input from other authors. I.B.H assisted with the design of  
48  
49 the study. A.N., N.Z., J.S.C., Y.S., C.M., B.H., and E.S. were all involved with  
50  
51 modifications to the design of the study and with drafting of this paper. All authors have  
52  
53 read and approved the final manuscript.  
54  
55  
56  
57  
58  
59  
60

### Competing Interests Statement

Professor Ian Hickie was an inaugural Commissioner on Australia's National Mental Health Commission (2012-18). He is the Co-Director, Health and Policy at the Brain and Mind Centre (BMC) University of Sydney. The BMC operates early-intervention youth services at Camperdown under contract to *headspace*. He is the Chief Scientific Advisor to, and a 5% equity shareholder in, InnoWell Pty Ltd. InnoWell was formed by the University of Sydney (45% equity) and PwC (Australia; 45% equity) to deliver the \$30M Australian Government-funded Project Synergy (2017-20; a three-year program for the transformation of mental health services) and to lead transformation of mental health services internationally through the use of innovative technologies.



## References

1. Liu NH, Daumit GL, Dua T, et al. Excess mortality in persons with severe mental disorders: a multilevel intervention framework and priorities for clinical practice, policy and research agendas. *World psychiatry* 2017;16(1):30-40.
2. Chesney E, Goodwin GM, Fazel S. Risks of all-cause and suicide mortality in mental disorders: a meta-review. *World Psychiatry* 2014;13(2):153-60.
3. Laursen TM, Musliner KL, Benros ME, et al. Mortality and life expectancy in persons with severe unipolar depression. *Journal of affective disorders* 2016;193:203-07.
4. Cuijpers P, Vogelzangs N, Twisk J, et al. Comprehensive meta-analysis of excess mortality in depression in the general community versus patients with specific illnesses. *American journal of psychiatry* 2014;171(4):453-62.
5. Hayes J, Miles J, Walters K, et al. A systematic review and meta-analysis of premature mortality in bipolar affective disorder. *Acta Psychiatrica Scandinavica* 2015;131(6):417-25.
6. Roberts LW, Louie AK, Guerrero APS, et al. Premature Mortality Among People with Mental Illness: Advocacy in Academic Psychiatry. *Academic Psychiatry* 2017;41(4):441-46. doi: 10.1007/s40596-017-0738-9
7. Feliciano EMC, Quante M, Rifas-Shiman SL, et al. Objective sleep characteristics and cardiometabolic health in young adolescents. *Pediatrics* 2018;142(1):e20174085.
8. Quante M, Feliciano EMC, Rifas-Shiman SL, et al. Association of Daily Rest-Activity Patterns With Adiposity and Cardiometabolic Risk Measures in Teens. *Journal of Adolescent Health* 2019.
9. Grandner MA, Jackson NJ, Pak VM, et al. Sleep disturbance is associated with cardiovascular and metabolic disorders. *Journal of sleep research* 2012;21(4):427-33.
10. Ringen PA, Faerden A, Antonsen B, et al. Cardiometabolic risk factors, physical activity and psychiatric status in patients in long-term psychiatric inpatient departments. *Nordic journal of psychiatry* 2018;72(4):296-302.
11. Scheewe T, Jörg F, Takken T, et al. Low physical activity and Cardiorespiratory fitness in people with schizophrenia: a comparison with matched healthy controls and associations with mental and physical health. *Frontiers in psychiatry* 2019;10:87.
12. Vancampfort D, Stubbs B. Physical activity and metabolic disease among people with affective disorders: Prevention, management and implementation. *Journal of Affective Disorders* 2017;224:87-94. doi: <https://doi.org/10.1016/j.jad.2016.07.042>
13. Vancampfort D, Firth J, Schuch F, et al. Physical activity and sedentary behavior in people with bipolar disorder: a systematic review and meta-analysis. *Journal of affective disorders* 2016;201:145-52.
14. Vancampfort D, Firth J, Schuch FB, et al. Sedentary behavior and physical activity levels in people with schizophrenia, bipolar disorder and major depressive disorder: a global systematic review and meta-analysis. *World Psychiatry* 2017;16(3):308-15.
15. Schuch F, Vancampfort D, Firth J, et al. Physical activity and sedentary behavior in people with major depressive disorder: a systematic review and meta-analysis. *Journal of affective disorders* 2017;210:139-50.

16. Vancampfort D, Sienaert P, Wyckaert S, et al. Sitting time, physical fitness impairments and metabolic abnormalities in people with bipolar disorder: An exploratory study. *Psychiatry Research* 2016;242:7-12. doi: <https://doi.org/10.1016/j.psychres.2016.05.023>
17. Soreca I, Wallace M, Hall M, et al. The association between meal timing and frequency with cardiometabolic profile in patients with bipolar disorder. *Acta Psychiatrica Scandinavica* 2016;133(6):453-58.
18. Teasdale SB, Ward PB, Samaras K, et al. Dietary intake of people with severe mental illness: systematic review and meta-analysis. *The British Journal of Psychiatry* 2019;214(5):251-59.
19. Firth J, Stubbs B, Teasdale SB, et al. Diet as a hot topic in psychiatry: a population-scale study of nutritional intake and inflammatory potential in severe mental illness. *World Psychiatry* 2018;17(3):365.
20. Barker MK, Sable CM, Montgomery SE, et al. Diet and cardiometabolic side effects in children treated with second-generation antipsychotics. *Clinical nutrition ESPEN* 2018;23:205-11.
21. Mallet J, Le Strat Y, Schürhoff F, et al. Tobacco smoking is associated with antipsychotic medication, physical aggressiveness, and alcohol use disorder in schizophrenia: results from the FACE-SZ national cohort. *European archives of psychiatry and clinical neuroscience* 2019;269(4):449-57.
22. Jackson JG, Diaz FJ, Lopez L, et al. A combined analysis of worldwide studies demonstrates an association between bipolar disorder and tobacco smoking behaviors in adults. *Bipolar Disorders* 2015;17(6):575-97.
23. Richardson S, McNeill A, Brose LS. Smoking and quitting behaviours by mental health conditions in Great Britain (1993–2014). *Addictive behaviors* 2019;90:14-19.
24. Prochaska JJ, Das S, Young-Wolff KC. Smoking, mental illness, and public health. *Annual Review of Public Health* 2017;38:165-85.
25. Callaghan RC, Veldhuizen S, Jeysingh T, et al. Patterns of tobacco-related mortality among individuals diagnosed with schizophrenia, bipolar disorder, or depression. *Journal of psychiatric research* 2014;48(1):102-10.
26. Weinberger AH, Streck JM, Pacek LR, et al. Nondaily Cigarette Smoking Is Increasing Among People With Common Mental Health and Substance Use Problems in the United States:: Data From Representative Samples of US Adults, 2005–2014. *The Journal of clinical psychiatry* 2018;79(5)
27. Seida JC, Schouten JR, Boylan K, et al. Antipsychotics for children and young adults: a comparative effectiveness review. *Pediatrics* 2012;129(3):e771-e84.
28. Cheng-Shannon J, McGough JJ, Pataki C, et al. Second-generation antipsychotic medications in children and adolescents. *Journal of Child & Adolescent Psychopharmacology* 2004;14(3):372-94.
29. Pillay J, Boylan K, Carrey N, et al. First-and second-generation antipsychotics in children and young adults: systematic review update. 2017
30. Jerrell JM, McIntyre RS. Adverse events in children and adolescents treated with antipsychotic medications. *Human Psychopharmacology: Clinical and Experimental* 2008;23(4):283-90.
31. De Hert M, Yu W, Detraux J, et al. Body weight and metabolic adverse effects of aripiprazole, iloperidone, lurasidone and paliperidone in the treatment of schizophrenia and bipolar disorder. *CNS drugs* 2012;26(9):733-59.

- 1
- 2
- 3
- 4 32. Ngai YF, Sabatini P, Nguyen D, et al. Quetiapine treatment in youth is associated
- 5 with decreased insulin secretion. *Journal of clinical psychopharmacology*
- 6 2014;34(3):359-64.
- 7 33. Panagiotopoulos C, Ronsley R, Davidson J. Increased prevalence of obesity and
- 8 glucose intolerance in youth treated with second—generation antipsychotic
- 9 medications. *The Canadian Journal of Psychiatry* 2009;54(11):743-49.
- 10 34. Scott EM, Hermens DF, White D, et al. Body mass, cardiovascular risk and
- 11 metabolic characteristics of young persons presenting for mental healthcare in
- 12 Sydney, Australia. *BMJ open* 2015;5(3):e007066.
- 13 35. Fraguas D, Correll CU, Merchán-Naranjo J, et al. Efficacy and safety of second-
- 14 generation antipsychotics in children and adolescents with psychotic and
- 15 bipolar spectrum disorders: comprehensive review of prospective head-to-
- 16 head and placebo-controlled comparisons. *European*
- 17 *Neuropsychopharmacology* 2011;21(8):621-45.
- 18 36. Zuddas A, Zanni R, Usala T. Second generation antipsychotics (SGAs) for non-
- 19 psychotic disorders in children and adolescents: a review of the randomized
- 20 controlled studies. *European Neuropsychopharmacology* 2011;21(8):600-20.
- 21 37. Martínez-Ortega JM, Funes-Godoy S, Díaz-Atienza F, et al. Weight gain and
- 22 increase of body mass index among children and adolescents treated with
- 23 antipsychotics: a critical review. *European child & adolescent psychiatry*
- 24 2013;22(8):457-79.
- 25 38. Baeza I, Vigo L, de la Serna E, et al. The effects of antipsychotics on weight
- 26 gain, weight-related hormones and homocysteine in children and adolescents:
- 27 a 1-year follow-up study. *European child & adolescent psychiatry*
- 28 2017;26(1):35-46.
- 29 39. Stigler KA, Potenza MN, Posey DJ, et al. Weight gain associated with atypical
- 30 antipsychotic use in children and adolescents. *Pediatric Drugs* 2004;6(1):33-
- 31 44.
- 32 40. De Hert M, Dobbelaere M, Sheridan EM, et al. Metabolic and endocrine adverse
- 33 effects of second-generation antipsychotics in children and adolescents: A
- 34 systematic review of randomized, placebo controlled trials and guidelines for
- 35 clinical practice. *European Psychiatry* 2011;26(3):144-58. doi:
- 36 <https://doi.org/10.1016/j.eurpsy.2010.09.011>
- 37 41. Correll CU, Carlson HE. Endocrine and metabolic adverse effects of
- 38 psychotropic medications in children and adolescents. *Journal of the*
- 39 *American Academy of Child & Adolescent Psychiatry* 2006;45(7):771-91.
- 40 42. Maayan L, Correll CU. Weight gain and metabolic risks associated with
- 41 antipsychotic medications in children and adolescents. *Journal of child and*
- 42 *adolescent psychopharmacology* 2011;21(6):517-35.
- 43 43. Correll CU, Manu P, Olshanskiy V, et al. Cardiometabolic Risk of Second-
- 44 Generation Antipsychotic Medications During First-Time Use in Children and
- 45 Adolescents. *JAMA* 2009;302(16):1765-73. doi: 10.1001/jama.2009.1549
- 46 44. Arango C, Robles O, Parellada M, et al. Olanzapine compared to quetiapine in
- 47 adolescents with a first psychotic episode. *European child & adolescent*
- 48 *psychiatry* 2009;18(7):418.
- 49 45. Safer DJ. A comparison of risperidone-induced weight gain across the age span.
- 50 *Journal of clinical psychopharmacology* 2004;24(4):429-36.
- 51 46. WHO. Management of physical health conditions in adults with severe mental
- 52 disorders: WHO guidelines. 2018
- 53
- 54
- 55
- 56
- 57
- 58
- 59
- 60

- 1
- 2
- 3
- 4 47. Gluth A, White D, Ward M. Lifestyle interventions in patients with serious mental
- 5 illness. *Lifestyle in Heart Health and Disease*: Elsevier 2018:247-53.
- 6 48. Parker AG, Bailey AP. Exercise for adolescents and young people with mental
- 7 illness. *Exercise-Based Interventions for Mental Illness*: Elsevier 2018:149-67.
- 8 49. De Rosa C, Sampogna G, Luciano M, et al. Improving physical health of patients
- 9 with severe mental disorders: a critical review of lifestyle psychosocial
- 10 interventions. *Expert review of neurotherapeutics* 2017;17(7):667-81.
- 11 50. Rönngren Y, Björk A, Audulv Å, et al. Educational nurse-led lifestyle intervention
- 12 for persons with mental illness. *International journal of mental health nursing*
- 13 2018;27(3):1022-31.
- 14 51. Fiorillo A, Luciano M, Pompili M, et al. Reducing the Mortality Gap in People With
- 15 Severe Mental Disorders: The Role of Lifestyle Psychosocial Interventions.
- 16 *Frontiers in psychiatry* 2019;10
- 17 52. Taylor CI, Tompsett C, Sanders R, et al. The effectiveness of structured exercise
- 18 programmes on psychological and physiological outcomes for patients with
- 19 psychotic disorders: A systematic review and meta-analysis. *International*
- 20 *Journal of Sport and Exercise Psychology* 2018:1-26.
- 21 53. Goracci A, Rucci P, Forgiione R, et al. Development, acceptability and efficacy of
- 22 a standardized healthy lifestyle intervention in recurrent depression. *Journal of*
- 23 *affective disorders* 2016;196:20-31.
- 24 54. Murphy JA, Oliver G, Ng C, et al. Pilot-Testing of “Healthy Body Healthy Mind”:
- 25 An Integrative Lifestyle Program for Patients With a Mental Illness and Co-
- 26 morbid Metabolic Syndrome. *Frontiers in psychiatry* 2019;10:91.
- 27 55. Bersani FS, Biondi M, Coviello M, et al. Psychoeducational intervention focused
- 28 on healthy living improves psychopathological severity and lifestyle quality in
- 29 psychiatric patients: preliminary findings from a controlled study. *Journal of*
- 30 *Mental Health* 2017;26(3):271-75.
- 31 56. Gurusamy J, Gandhi S, Damodharan D, et al. Exercise, diet and educational
- 32 interventions for metabolic syndrome in persons with schizophrenia: a
- 33 systematic review. *Asian Journal of Psychiatry* 2018;36:73-85.
- 34 57. Rosenbaum S, Newby JM, Steel Z, et al. Online physical activity interventions for
- 35 mental disorders: A systematic review. *Internet Interventions* 2015;2(2):214-
- 36 20.
- 37 58. Lambert JD, Greaves CJ, Farrand P, et al. Web-based intervention using
- 38 behavioral activation and physical activity for adults with depression (the
- 39 eMotion study): pilot randomized controlled trial. *Journal of medical Internet*
- 40 *research* 2018;20(7):e10112.
- 41 59. Parker AG, Markulev C, Rickwood DJ, et al. Improving Mood with Physical
- 42 ACTivity (IMPACT) trial: a cluster randomised controlled trial to determine the
- 43 effectiveness of a brief physical activity behaviour change intervention on
- 44 depressive symptoms in young people, compared with psychoeducation, in
- 45 addition to routine clinical care within youth mental health services—a
- 46 protocol study. *BMJ open* 2019;9(10)
- 47 60. Nasstasia Y, Baker AL, Halpin SA, et al. Evaluating the efficacy of an integrated
- 48 motivational interviewing and multi-modal exercise intervention for youth with
- 49 major depression: Healthy Body, Healthy Mind randomised controlled trial
- 50 protocol. *Contemporary clinical trials communications* 2018;9:13-22.
- 51 61. Parker AG, Hetrick SE, Jorm AF, et al. The effectiveness of simple psychological
- 52 and physical activity interventions for high prevalence mental health problems
- 53
- 54
- 55
- 56
- 57
- 58
- 59
- 60

- in young people: a factorial randomised controlled trial. *Journal of affective disorders* 2016;196:200-09.
62. Rohleder C, Song YJC, Crouse JJ, et al. Youth Mental Health Tracker: protocol to establish a longitudinal cohort and research database for young people attending Australian mental health services. *BMJ Open* 2020;10(6):e035379. doi: 10.1136/bmjopen-2019-035379
63. American Psychiatric Association. Diagnostic and statistical manual of mental disorders. 5th ed. Arlington, VA2013.
64. Hill NR, Levy JC, Matthews DR. Expansion of the homeostasis model assessment of  $\beta$ -cell function and insulin resistance to enable clinical trial outcome modeling through the interactive adjustment of physiology and treatment effects: iHOMA2. *Diabetes care* 2013;36(8):2324-30.
65. Overall JE, Gorham DR. The brief psychiatric rating scale. *Psychol Rep* 1962;10:799-812.
66. Bell M, Milstein R, Beam-Goulet J, et al. The Positive and Negative Syndrome Scale and the Brief Psychiatric Rating Scale: reliability, comparability, and predictive validity. *Journal of Nervous and Mental Disease* 1992
67. Hickie IB, Scott EM, Hermens DF, et al. Applying clinical staging to young people who present for mental health care. *Early Intervention in Psychiatry* 2013;7(1):31-43.
68. McGorry PD, Hickie IB, Yung AR, et al. Clinical staging of psychiatric disorders: a heuristic framework for choosing earlier, safer and more effective interventions. *The Australian and New Zealand journal of psychiatry* 2006;40(8):616-22. doi: 10.1080/j.1440-1614.2006.01860.x [published Online First: 2006/07/27]
69. Scott J, Leboyer M, Hickie I, et al. Clinical staging in psychiatry: a cross-cutting model of diagnosis with heuristic and practical value. *British Journal of Psychiatry* 2013;202(4):243-45. doi: 10.1192/bjp.bp.112.110858 [published Online First: 2018/01/02]
70. Hickie IB, Scott J, McGorry PD. Clinical staging for mental disorders: a new development in diagnostic practice in mental health. *Med J Aust* 2013;198(9):461-2. [published Online First: 2013/05/21]
71. Hickie IB, Hermens DF, Naismith SL, et al. Evaluating differential developmental trajectories to adolescent-onset mood and psychotic disorders. *BMC psychiatry* 2013;13:303. doi: 10.1186/1471-244x-13-303 [published Online First: 2013/11/13]
72. Busner J, Targum SD. The Clinical Global Impressions Scale: Applying a Research Tool in Clinical Practice. *Psychiatry (Edgmont)* 2007;4(7):28-37.
73. Young R, Biggs J, Ziegler V, et al. A rating scale for mania: reliability, validity and sensitivity. *The British Journal of Psychiatry* 1978;133(5)
74. Rosenbaum S, Ward PB. The simple physical activity questionnaire. *The Lancet Psychiatry* 2016;3(1):e1.
75. Rosenbaum S, Morell R, Abdel-Baki A, et al. Assessing physical activity in people with mental illness: 23-country reliability and validity of the simple physical activity questionnaire (SIMPAQ). *Bmc Psychiatry* 2020;20(1):1-12.
76. Yung AR, Yuen HP, McGorry PD, et al. Mapping the onset of psychosis: the Comprehensive Assessment of At-Risk Mental States. *Aust N Z J Psychiatry* 2005;39:964-71.
77. Hilsenroth MJ, Ackerman SJ, Blagys MD, et al. Reliability and validity of DSM-IV axis V. *American Journal of Psychiatry* 2000;157(11):1858-63.

- 1
- 2
- 3
- 4 78. Hay P, Katsikitis M, Begg J, et al. A two-year follow-up study and prospective
- 5 evaluation of the DSM-IV axis V. *Psychiatric Services* 2003;54(7):1028-30.
- 6
- 7 79. Hay PJ, Mond J, Buttner P, et al. Eating disorder behaviors are increasing:
- 8 findings from two sequential community surveys in South Australia. *PLoS*
- 9 *ONE* 2008;3(2):e1541. doi: 10.1371/journal.pone.0001541 [published Online
- 10 First: 2008/02/07]
- 11
- 12 80. Mitchison D, Hay P, Slewa-Younan S, et al. The changing demographic profile of
- 13 eating disorder behaviors in the community. *BMC public health* 2014;14:943.
- 14 doi: 10.1186/1471-2458-14-943 [published Online First: 2014/09/13]
- 15
- 16 81. Berg KC, Peterson CB, Frazier P, et al. Psychometric evaluation of the eating
- 17 disorder examination and eating disorder examination-questionnaire: A
- 18 systematic review of the literature. *International Journal of Eating Disorders*
- 19 2012;45(3):428-38.
- 20
- 21 82. Kessler RC, Andrews G, Colpe LJ, et al. Short screening scales to monitor
- 22 population prevalences and trends in non-specific psychological distress.
- 23 *Psychol Med* 2002;32(6):959-76. [published Online First: 2002/09/07]
- 24
- 25 83. Andrews G, Slade T. Interpreting scores on the Kessler Psychological Distress
- 26 Scale (K10). *Australian and New Zealand journal of public health*
- 27 2001;25(6):494-7. [published Online First: 2002/02/05]
- 28
- 29 84. Smout MF. The factor structure and predictive validity of the Kessler
- 30 Psychological Distress Scale (K10) in children and adolescents. *Australian*
- 31 *Psychologist* 2019;54(2):102-13.
- 32
- 33 85. Craig CL, Marshall AL, Sjoström M, et al. International physical activity
- 34 questionnaire: 12-country reliability and validity. *Med Sci Sports Exerc*
- 35 2003;35(8):1381-95. doi: 10.1249/01.MSS.0000078924.61453.FB [published
- 36 Online First: 2003/08/06]
- 37
- 38 86. Booth M. Assessment of physical activity: an international perspective. *Res Q*
- 39 *Exerc Sport* 2000;71(2 Suppl):S114-20. [published Online First: 2000/08/05]
- 40
- 41 87. Berryman C, McAuley JH, Moseley LG. Sphere 12 screening questionnaire.
- 42 *Journal of Physiotherapy* 2012;58(4):273.
- 43
- 44 88. Smyth C. The Pittsburgh sleep quality index (PSQI). *Journal of gerontological*
- 45 *nursing* 1999;25(12):10-10.
- 46
- 47 89. Shahid A, Wilkinson K, Marcu S, et al. Munich Chronotype Questionnaire
- 48 (MCTQ). STOP, THAT and One Hundred Other Sleep Scales: Springer
- 49 2011:245-47.
- 50
- 51 90. Raniti MB, Waloszek JM, Schwartz O, et al. Factor structure and psychometric
- 52 properties of the Pittsburgh Sleep Quality Index in community-based
- 53 adolescents. *Sleep* 2018;41(6):zsy066.
- 54
- 55 91. Carpenter JS, Andrykowski MA. Psychometric evaluation of the Pittsburgh sleep
- 56 quality index. *Journal of psychosomatic research* 1998;45(1):5-13.
- 57
- 58 92. Morin CM. *Insomnia: psychological assessment and management*: Guilford
- 59 press 1993.
- 60
93. Morin CM, Belleville G, Bédanger L, et al. The Insomnia Severity Index:
- psychometric indicators to detect insomnia cases and evaluate treatment
- response. *Sleep* 2011;34(5):601-08.
94. van Spijker BA, Batterham PJ, Caelear AL, et al. The suicidal ideation attributes
- scale (SIDAS): Community-based validation study of a new scale for the
- measurement of suicidal ideation. *Suicide & life-threatening behavior*
- 2014;44(4):408-19. doi: 10.1111/sltb.12084 [published Online First:
- 2014/03/13]

- 1
- 2
- 3
- 4 95. AJ B, Spijker P, BATTERHAM PJ, et al. The Suicidal Ideation Attributes Scale
- 5 (SIDAS): Community-Based Validation Study of a New Scale for the
- 6 Measurement of Suicidal Ideation. 2014
- 7 96. Rush AJ, Trivedi MH, Ibrahim HM, et al. The 16-Item Quick Inventory of
- 8 Depressive Symptomatology (QIDS), clinician rating (QIDS-C), and self-report
- 9 (QIDS-SR): a psychometric evaluation in patients with chronic major
- 10 depression. *Biol Psychiatry* 2003;54(5):573-83. [published Online First:
- 11 2003/08/30]
- 12 97. Rush AJ, Trivedi MH, Ibrahim HM, et al. The 16-Item Quick Inventory of
- 13 Depressive Symptomatology (QIDS), clinician rating (QIDS-C), and self-report
- 14 (QIDS-SR): a psychometric evaluation in patients with chronic major
- 15 depression. *Biological psychiatry* 2003;54(5):573-83.
- 16 98. Norman SB, Cissell SH, Means-Christensen AJ, et al. Development and
- 17 validation of an Overall Anxiety Severity And Impairment Scale (OASIS).
- 18 *Depress Anxiety* 2006;23(4):245-9. doi: 10.1002/da.20182 [published Online
- 19 First: 2006/05/12]
- 20 99. Norman SB, Hami Cissell S, Means-Christensen AJ, et al. Development and
- 21 validation of an overall anxiety severity and impairment scale (OASIS).
- 22 *Depression and anxiety* 2006;23(4):245-49.
- 23 100. Humeniuk R, Ali R, Babor TF, et al. Validation of the Alcohol, Smoking And
- 24 Substance Involvement Screening Test (ASSIST). *Addiction*
- 25 2008;103(6):1039-47. doi: 10.1111/j.1360-0443.2007.02114.x [published
- 26 Online First: 2008/04/01]
- 27 101. WHO ASSIST Working Group. The Alcohol, Smoking and Substance
- 28 Involvement Screening Test (ASSIST): development, reliability and feasibility.
- 29 *Addiction* 2002;97(9):1183-94. [published Online First: 2002/08/30]
- 30 102. Newcombe DA, Humeniuk RE, Ali R. Validation of the world health organization
- 31 alcohol, smoking and substance involvement screening test (ASSIST): report
- 32 of results from the Australian site. *Drug and alcohol review* 2005;24(3):217-
- 33 26.
- 34 103. Group WAW. The alcohol, smoking and substance involvement screening test
- 35 (ASSIST): development, reliability and feasibility. *Addiction* 2002;97(9):1183-
- 36 94.
- 37 104. Bush K, Kivlahan DR, McDonell MB, et al. The AUDIT alcohol consumption
- 38 questions (AUDIT-C): an effective brief screening test for problem drinking.
- 39 Ambulatory Care Quality Improvement Project (ACQUIP). Alcohol Use
- 40 Disorders Identification Test. *Archives of internal medicine*
- 41 1998;158(16):1789-95. [published Online First: 1998/09/17]
- 42 105. de Meneses-Gaya C, Zuardi AW, Loureiro SR, et al. Alcohol Use Disorders
- 43 Identification Test (AUDIT): An updated systematic review of psychometric
- 44 properties. *Psychology & Neuroscience* 2009;2(1):83.
- 45 106. Rosenberg M. Rosenberg self-esteem scale (RSE). *Acceptance and*
- 46 *commitment therapy Measures package* 1965;61(52):18.
- 47 107. Robins RW, Hendin HM, Trzesniewski KH. Measuring global self-esteem:
- 48 Construct validation of a single-item measure and the Rosenberg Self-Esteem
- 49 Scale. *Personality and social psychology bulletin* 2001;27(2):151-61.
- 50 108. Bagley C, Mallick K. Normative data and mental health construct validity for the
- 51 Rosenberg Self-Esteem Scale in British Adolescents. *International Journal of*
- 52 *Adolescence and Youth* 2001;9(2-3):117-26.
- 53
- 54
- 55
- 56
- 57
- 58
- 59
- 60

- 1  
2  
3 109. Larsen DL, Attkisson CC, Hargreaves WA, et al. Assessment of client/patient  
4 satisfaction: development of a general scale. *Evaluation and program*  
5 *planning* 1979;2(3):197-207.  
6  
7 110. Difrancesco S, Lamers F, Riese H, et al. Sleep, circadian rhythm, and physical  
8 activity patterns in depressive and anxiety disorders: A 2-week ambulatory  
9 assessment study. *Depression and anxiety* 2019;36(10):975-86.  
10  
11 111. Schaefer CA, Nigg CR, Hill JO, et al. Establishing and evaluating wrist cutpoints  
12 for the GENEActiv accelerometer in youth. *Medicine and science in sports*  
13 *and exercise* 2014;46(4):826-33. doi: 10.1249/MSS.000000000000150  
14  
15 112. Hildebrand M, VT VANH, Hansen BH, et al. Age group comparability of raw  
16 accelerometer output from wrist- and hip-worn monitors. *Medicine and*  
17 *science in sports and exercise* 2014;46(9):1816-24. doi:  
18 10.1249/MSS.0000000000000289  
19  
20 113. Esliger DW, Rowlands AV, Hurst TL, et al. Validation of the GENE  
21 Accelerometer. *Medicine and science in sports and exercise* 2011;43(6):1085-  
22 93. doi: 10.1249/MSS.0b013e31820513be  
23  
24 114. van Hees VT, Gorzelniak L, Dean Leon EC, et al. Separating movement and  
25 gravity components in an acceleration signal and implications for the  
26 assessment of human daily physical activity. *PLoS ONE* 2013;8(4):e61691.  
27 doi: 10.1371/journal.pone.0061691 [published Online First: 2013/04/30]  
28  
29 115. te Lindert BH, Van Someren EJ. Sleep estimates using microelectromechanical  
30 systems (MEMS). *Sleep* 2013;36(5):781-9. doi: 10.5665/sleep.2648  
31  
32 116. van Hees VT, Sabia S, Anderson KN, et al. A Novel, Open Access Method to  
33 Assess Sleep Duration Using a Wrist-Worn Accelerometer. *PLoS ONE*  
34 2015;10(11):e0142533. doi: 10.1371/journal.pone.0142533  
35  
36  
37  
38  
39  
40  
41  
42  
43  
44  
45  
46  
47  
48  
49  
50  
51  
52  
53  
54  
55  
56  
57  
58  
59  
60



# BMJ Open

**The effect of an online healthy lifestyle psychoeducation program to improve cardiometabolic outcomes and affective symptoms in youth receiving mental health care: study protocol for a clinical trial.**

|                                 |                                                                                                                                                                                                                                                                                                                                                                                                                                                                                                                                                                                                                                                                                                                               |
|---------------------------------|-------------------------------------------------------------------------------------------------------------------------------------------------------------------------------------------------------------------------------------------------------------------------------------------------------------------------------------------------------------------------------------------------------------------------------------------------------------------------------------------------------------------------------------------------------------------------------------------------------------------------------------------------------------------------------------------------------------------------------|
| Journal:                        | <i>BMJ Open</i>                                                                                                                                                                                                                                                                                                                                                                                                                                                                                                                                                                                                                                                                                                               |
| Manuscript ID                   | bmjopen-2020-044977.R1                                                                                                                                                                                                                                                                                                                                                                                                                                                                                                                                                                                                                                                                                                        |
| Article Type:                   | Protocol                                                                                                                                                                                                                                                                                                                                                                                                                                                                                                                                                                                                                                                                                                                      |
| Date Submitted by the Author:   | 19-Feb-2021                                                                                                                                                                                                                                                                                                                                                                                                                                                                                                                                                                                                                                                                                                                   |
| Complete List of Authors:       | Wilson, Chloe; The University of Sydney Brain and Mind Centre<br>Nichles, Alissa; The University of Sydney Brain and Mind Centre, Brain and Mind Centre<br>Zmicerevska, Natalia; The University of Sydney Brain and Mind Centre<br>Carpenter, Joanne; University of Sydney Brain and Mind Research Institute, ;<br>Song, Yun; The University of Sydney, Brain and Mind Centre<br>McHugh, Catherine; The University of Sydney,<br>Hamilton, Blake; The University of Sydney, Brain and Mind Centre<br>Hockey, Samuel; The University of Sydney Brain and Mind Centre<br>Scott, Elizabeth; The University of Sydney Brain and Mind Centre<br>Hickie, Ian; The University of Sydney Brain and Mind Centre, Brain and Mind Centre |
| <b>Primary Subject Heading</b>: | Mental health                                                                                                                                                                                                                                                                                                                                                                                                                                                                                                                                                                                                                                                                                                                 |
| Secondary Subject Heading:      | Mental health                                                                                                                                                                                                                                                                                                                                                                                                                                                                                                                                                                                                                                                                                                                 |
| Keywords:                       | MENTAL HEALTH, MEDICAL EDUCATION & TRAINING, Child & adolescent psychiatry < PSYCHIATRY, Depression & mood disorders < PSYCHIATRY, Schizophrenia & psychotic disorders < PSYCHIATRY                                                                                                                                                                                                                                                                                                                                                                                                                                                                                                                                           |
|                                 |                                                                                                                                                                                                                                                                                                                                                                                                                                                                                                                                                                                                                                                                                                                               |

SCHOLARONE™  
Manuscripts

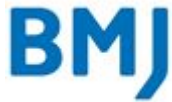

I, the Submitting Author has the right to grant and does grant on behalf of all authors of the Work (as defined in the below author licence), an exclusive licence and/or a non-exclusive licence for contributions from authors who are: i) UK Crown employees; ii) where BMJ has agreed a CC-BY licence shall apply, and/or iii) in accordance with the terms applicable for US Federal Government officers or employees acting as part of their official duties; on a worldwide, perpetual, irrevocable, royalty-free basis to BMJ Publishing Group Ltd ("BMJ") its licensees and where the relevant Journal is co-owned by BMJ to the co-owners of the Journal, to publish the Work in this journal and any other BMJ products and to exploit all rights, as set out in our [licence](#).

The Submitting Author accepts and understands that any supply made under these terms is made by BMJ to the Submitting Author unless you are acting as an employee on behalf of your employer or a postgraduate student of an affiliated institution which is paying any applicable article publishing charge ("APC") for Open Access articles. Where the Submitting Author wishes to make the Work available on an Open Access basis (and intends to pay the relevant APC), the terms of reuse of such Open Access shall be governed by a Creative Commons licence – details of these licences and which [Creative Commons](#) licence will apply to this Work are set out in our licence referred to above.

Other than as permitted in any relevant BMJ Author's Self Archiving Policies, I confirm this Work has not been accepted for publication elsewhere, is not being considered for publication elsewhere and does not duplicate material already published. I confirm all authors consent to publication of this Work and authorise the granting of this licence.

1  
2  
3 **Title:** The effect of an online healthy lifestyle psychoeducation program to improve  
4 cardiometabolic outcomes and affective symptoms in youth receiving mental health  
5 care: study protocol for a clinical trial.  
6  
7  
8  
9

10  
11  
12  
13  
14 **Authors:** Chloe Wilson, Alissa Nichles, Natalia Zmicerevska, Joanne Carpenter, Yun  
15 Song, Cate McHugh, Blake Hamilton, Samuel Hockey, Elizabeth Scott, Ian B. Hickie.  
16  
17  
18

19  
20  
21 Youth Mental Health and Technology Team, Brain and Mind Centre, University of  
22 Sydney, Sydney, NSW, Australia.  
23  
24

25  
26 \*Corresponding author: Chloe Wilson ([chloe.wilson@sydney.edu.au](mailto:chloe.wilson@sydney.edu.au))  
27  
28  
29  
30  
31  
32

33 Word Count: 4236 (without Abstract and References)  
34  
35  
36  
37  
38  
39  
40  
41  
42  
43  
44  
45  
46  
47  
48  
49  
50  
51  
52  
53  
54  
55  
56  
57  
58  
59  
60

## Abstract

### Introduction

Worsened cardiometabolic profiles in youth with mental ill-health have been associated with a number of modifiable lifestyle risk factors. It is becoming increasingly evident that clinical interventions need to be multi-modal in focus to improve not only mental health symptoms, but also the physical health symptoms in this already at-risk cohort.

### Methods and Analysis:

This 12-week clinical pilot trial examines the efficacy, feasibility and acceptability of an adjunctive online psychoeducation program for improving cardiometabolic risk parameters and affective symptoms in a transdiagnostic sample of at least 44 young people aged 16-25 presenting for mental health care for mood and/or psychotic syndromes (including anxiety, depression, bipolar disorder and psychosis). Individuals will be invited to participate in a clinical pilot trial for a structured online psychoeducation program incorporating nutritional, physical activity, sleep-wake and healthy lifestyle information, delivered fortnightly over 6 online modules. Participants will undergo a series of assessments including: (1) self-report and clinician administered assessments determining mental health symptomatology; (2) blood tests to assess cardiometabolic markers (fasting insulin, fasting glucose, blood lipids); (3) anthropometric assessments (height, weight, waist circumference and blood pressure); and (4) sleep-wake behaviours and circadian rhythm assessments. Changes in scores for all cardiometabolic and affective measures will be assessed via paired samples t-tests, and correlations between change scores will be assessed via Pearson's correlations.

## Ethics and Dissemination

This clinical trial has been approved by the Sydney Local Health District Research Ethics and Governance Office (X20-0228 & 2020/ETH01201). The results of this clinical trial will be disseminated into the scientific and broader community through peer-reviewed journals, conference presentations, social media and university websites.

## Trial Registration

Australian New Zealand Clinical Trials Registry (ANZCTR) Number: ACTRN12620000772943, Date 28 August, 2020.

## Keywords:

Youth mental ill-health, psychoeducation, cardiometabolic improvement, physical activity, sleep-wake cycle regulation.

## Strengths and Limitations of this Study

- This clinical trial evaluates a multidisciplinary online psychoeducation program (involving structured nutrition, physical activity, sleep-wake and healthy lifestyle information) for improving cardiometabolic risk parameters and affective symptoms, in a transdiagnostic group of young people receiving mental health care.
- A range of cardiometabolic, anthropometric, sleep-wake and mental health symptoms are assessed throughout the trial to determine whether these factors influence each other.
- Online delivery of psychoeducation modules will allow participants to access the information remotely.
- As this is a single-arm study, it cannot determine the efficacy of the intervention compared to other behavioural interventions in the same cohort.
- This pilot study will provide important information about how multidisciplinary behavioural modification programs may help to manage the immediate cardiometabolic and affective symptoms of young people receiving mental health care however cannot draw conclusions about the long-term effects of these lifestyle changes.

## Background

Premature mortality in those with severe mental illness has been well documented<sup>1-6</sup>, with diabetes and premature cardiovascular disease comprising some of the leading causes of premature mortality and morbidity in this cohort. Increased body mass index (BMI) and weight gain have been identified as key modifiable risk factors causing premature mortality and morbidity in young people with severe mental illness, along

1  
2  
3 with poor sleep-wake cycle regulation <sup>7-9</sup>, physical inactivity <sup>10-16</sup>, poor dietary habits <sup>10</sup>  
4  
5 <sup>17-20</sup> and smoking <sup>21-26</sup>.  
6  
7  
8  
9

10 Whilst many mental disorders can be managed with psychotherapy alone,  
11  
12 psychotropic medications including antipsychotics, antidepressants and mood  
13  
14 stabilisers are sometimes used for the treatment of a number of psychotic, affective  
15  
16 and behavioural disorders in youth <sup>27 28</sup>. Adolescents initiating psychotropic  
17  
18 medications may display heterogeneous side effects with some very complex long-  
19  
20 term cardiometabolic side effects <sup>29-32</sup>. Of particular concern, is the weight-gain  
21  
22 associated with second-generation antipsychotic (SGA) usage <sup>29 33-37</sup> which is acute  
23  
24 and can often be observed within 12 weeks of medication initiation <sup>38-43</sup>. Children and  
25  
26 adolescents appear to be at a greater risk of psychotropic-induced weight gain than  
27  
28 adults <sup>44 45</sup> and the younger the age of the child, the higher the mitigating risk <sup>37</sup>.  
29  
30 Psychotropic medication induced weight gain is a noteworthy adverse drug reaction  
31  
32 as it mediates the development of other more severe cardiometabolic outcomes <sup>38-43</sup>.  
33  
34  
35  
36  
37  
38  
39

40 Lifestyle interventions can be an effective alternative to pharmacological interventions  
41  
42 to manage the physical and mental health symptoms of patients with psychiatric  
43  
44 disorders <sup>46</sup>. The World Health Organisation guidelines recommend lifestyle  
45  
46 behavioural interventions as a first-line treatment for physical health symptoms  
47  
48 (including the cardiometabolic health) of adults with severe mental illness <sup>47</sup>. The  
49  
50 benefits of lifestyle and behavioural interventions on weight loss in obesity and for  
51  
52 prevention of Type II Diabetes Mellitus (T2DM) are well-established <sup>48 49</sup>. Additionally,  
53  
54 psychoeducation interventions focusing on healthy lifestyle habits including diet,  
55  
56  
57  
58  
59  
60

1  
2  
3 physical activity and sleep-wake practices have been shown to ameliorate both the  
4  
5 physical and mental health concerns of young people with psychiatric disorders <sup>50-54</sup>.  
6  
7  
8  
9

10 Face-to-face psychoeducation interventions for adults with severe mental illness are  
11  
12 able to demonstrate significant improvements in weight <sup>55</sup>; depressive symptoms,  
13  
14 sleep quality and nutrition <sup>56</sup>; and other cardiometabolic risk factors <sup>57</sup>. Existing web-  
15  
16 based psychoeducation intervention studies on adults with mental illness have  
17  
18 demonstrated improvements in depression and anxiety symptoms <sup>58</sup>, with mixed  
19  
20 evidence on the effect of psychotic symptoms <sup>56 59</sup>, and increases in objective physical  
21  
22 activity levels <sup>60</sup>, however have not measured cardiometabolic risk factors objectively.  
23  
24 In youth, the literature in this field is more limited, with existing or planned studies in  
25  
26 youth cohorts measuring affective symptom improvements only <sup>61-63</sup>. Evidence on the  
27  
28 effect of healthy lifestyle psychoeducation programs on psychotic symptoms in youth  
29  
30 is non-existent to our knowledge.  
31  
32  
33  
34  
35  
36  
37

38 We are seeking to investigate the efficacy, feasibility and acceptability of a pilot clinical  
39  
40 trial implementing an online healthy lifestyle psychoeducation program targeted  
41  
42 towards improving objective cardiometabolic outcomes and affective symptoms in  
43  
44 young people presenting for mental health care for mood or psychotic syndromes  
45  
46 (including anxiety, depression, bipolar disorder and psychosis). Web-based  
47  
48 interventions provide an alternative to traditional face-to-face interventions. The need  
49  
50 for online programs is especially evident with the COVID-19 global pandemic impeding  
51  
52 on young people's ability to seek face-to-face support. This has given rise to a need  
53  
54 to develop more comprehensive resources tailored to the specific risk-factors of this  
55  
56 cohort in an easily accessible online format. Where effective, it would allow the  
57  
58  
59  
60



1  
2  
3 program to be implemented remotely, to many individuals who may not be able to  
4  
5 access in-person services.  
6  
7  
8  
9

## 10 **Methods and Analysis**

### 11 **Patient and Public Involvement**

12  
13  
14 The study design, conduct and psychoeducation module content was developed in  
15  
16 consultation with a representative from the Brain and Mind Centre Youth Lived  
17  
18 Experienced Working Group. Patients or the public were not involved in the  
19  
20 reporting, or dissemination plans of our research.  
21  
22  
23  
24  
25

### 26 **Design and Structure**

27  
28 This is a one-arm longitudinal pilot clinical trial. The duration of the pilot clinical trial is  
29  
30 12 weeks. All participants will engage in an online 12-week psychoeducation program.  
31  
32 This psychoeducation program will involve structured nutritional, physical activity,  
33  
34 sleep-wake and general healthy lifestyle information based on the Australian  
35  
36 Guidelines of Physical Activity, the Australian Guide to Healthy Eating, and published  
37  
38 circadian research findings specific to youth mental illness<sup>64-67</sup>. This information will  
39  
40 be delivered for approximately 1 hour each fortnight over 6 online modules (week 1,  
41  
42 3, 5, 7, 9, and 11). The modules and study design have been developed in conjunction  
43  
44 with mental health experts and those with a lived experience of mental ill health,  
45  
46 specifically by presenting module material to a lived experience researcher and  
47  
48 tailoring module content and delivery modes to ensure the suitability and relevance for  
49  
50 this cohort. Participants will be given a link to access the online psychoeducation  
51  
52 modules in their own time, or the opportunity to attend a live online module session.  
53  
54 These modules will cover the topics shown in Table 1.  
55  
56  
57  
58  
59  
60

**Table 1.** Psychoeducation modules

| Session                                                                  | Topics to be covered                                                                                                                                                                                                                                                                                 |
|--------------------------------------------------------------------------|------------------------------------------------------------------------------------------------------------------------------------------------------------------------------------------------------------------------------------------------------------------------------------------------------|
| 1. Body Clock and Sleep-Wake Cycle Regulation for mental health (part 1) | <ul style="list-style-type: none"> <li>- How the brain and body are connected</li> <li>- Establishing a healthy mindset</li> <li>- Importance of the brain and body clock and sleep-wake cycle regulation</li> <li>- How the brain and body clock coordinates all the biological systems</li> </ul>  |
| 2. Body Clock and Sleep-Wake Cycle Regulation for mental health (part 2) | <ul style="list-style-type: none"> <li>- Healthy sleep-wake behaviours</li> <li>- How lifestyle factors and behaviours influence the brain and body clock e.g. exercise, light exposure, sleep environment, sleep regularisation, naps, foods, stress, anxiety, mood.</li> </ul>                     |
| 3. Physical activity for mental health (part 1)                          | <ul style="list-style-type: none"> <li>- Benefits of physical activity for physical and mental health</li> <li>- Outline of Australian Physical Activity Guidelines</li> <li>- Barriers to engaging in physical activity</li> <li>- Increasing incidental activity, reducing sitting time</li> </ul> |
| 4. Physical activity for mental health (part 2)                          | <ul style="list-style-type: none"> <li>- Working out anywhere</li> <li>- Finding the motivation</li> <li>- Concept of energy in vs energy out</li> </ul>                                                                                                                                             |
| 5. Nutrition for mental health (part 1)                                  | <ul style="list-style-type: none"> <li>- Energy in vs energy out and introducing the concept of a calorie</li> <li>- Outline of Australian Dietary Guidelines</li> <li>- Standard serving sizes/portion sizes</li> </ul>                                                                             |
| 6. Nutrition for mental health (part 2)                                  | <ul style="list-style-type: none"> <li>- Timing of meals</li> <li>- Snacking</li> <li>- Meal preparation</li> <li>- Making healthy choices when eating out at restaurants</li> <li>- Managing comfort eating.</li> </ul>                                                                             |

Every week, participants will receive a monitoring phone call to help in the participant's engagement and ongoing participation. At the completion of all 6 modules the participant will be asked to provide feedback about the program and to share their overall satisfaction with the program via an online questionnaire. This questionnaire will provide important information about the acceptability and feasibility of the psychoeducation program in this cohort.

Participants will be asked to wear an actigraph (GENEActiv; Activinsights, Kimbolton, UK) on the non-dominant wrist to collect 24-hour sleep-wake and physical activity parameters during weeks 1-2, 6-7 and 11-12. Blood tests to measure metabolic markers, anthropometric assessments (blood pressure, height, weight and waist circumference), self-report and clinician administered assessments to assess various mental illness symptoms and physical activity engagement will be conducted in weeks

1 and 12. Most of these self-report and clinician administered assessments are part of the standardised assessment battery developed for the Youth Mental Health Tracker as part of the Brain and Mind Centre (BMC) multidimensional research framework<sup>68</sup>. The multidimensional outcome framework was developed to assess a comprehensive range of measures in individuals presenting to care across a range of domains important to mental health outcomes. All observational and interventional youth mental health research at the BMC uses a standardised set of measures within this framework.

The schedule of enrolment, interventions and assessment time points can be seen in Table 2.

**Table 2.** Schedule of enrolment, interventions and assessment time points.

| Study Procedures                             | Study Week |   |   |   |   |   |   |   |   |    |    |    |
|----------------------------------------------|------------|---|---|---|---|---|---|---|---|----|----|----|
|                                              | 1          | 2 | 3 | 4 | 5 | 6 | 7 | 8 | 9 | 10 | 11 | 12 |
| <b>Informed Consent</b>                      | x          |   |   |   |   |   |   |   |   |    |    |    |
| <b>Enrolment</b>                             | x          |   |   |   |   |   |   |   |   |    |    |    |
| <b>Psychoeducation Session</b>               | x          |   | x |   | x |   | x |   | x |    | x  |    |
| <b>Actigraphy</b>                            |            | x |   |   |   |   | x |   |   |    |    | x  |
| <b>Self-Report Questionnaires</b>            | x          |   |   |   |   |   |   |   |   |    |    | x  |
| <b>Clinician Administered Questionnaires</b> | x          |   |   |   |   |   |   |   |   |    |    | x  |
| <b>Blood Collection</b>                      | x          |   |   |   |   |   |   |   |   |    |    | x  |
| <b>Anthropometrics</b>                       | x          |   |   |   |   |   |   |   |   |    |    | x  |

### Setting, Recruitment and Informed Consent

This is a single-site, transdiagnostic intervention study, conducted at the BMC (including *headspace* Camperdown, and Early Intervention and High Intensity Services) at the University of Sydney (Sydney, Australia).

1  
2  
3  
4  
5  
6 Potential participants will be identified as young people aged between 16 and 25 years  
7  
8 of age presenting for mental health care, who are at risk for poor cardiometabolic  
9  
10 outcomes due to being overweight or obese. Treating clinicians will be made aware of  
11  
12 the study and eligibility criteria and will identify patients presenting for care at these  
13  
14 services who may be eligible for the study. With the patient's permission, the clinicians  
15  
16 will pass on the contact details to the study research team, who will make further  
17  
18 contact and initiate the informed consent process. The study staff will then obtain  
19  
20 written informed consent from the young person to participate in the psychoeducation  
21  
22 program. Each participant will have a participant ID that links the participant to the  
23  
24 research database in a confidential and de-identified manner for the purpose of  
25  
26 research.  
27  
28  
29

30  
31 Participants are free to withdraw from the study at any time by contacting research  
32  
33 staff. They will be assured that their decision whether to participate will not affect their  
34  
35 current or future relationship with the researchers or anyone else at The University of  
36  
37 Sydney nor their current or future involvement with the mental health service. If  
38  
39 participants withdraw from the study, all future data (i.e., from thereon) will not be  
40  
41 stored or used for research purposes.  
42  
43  
44

### 45 46 **Selection Criteria**

47  
48 Young people will be invited into the trial based on the following inclusion criteria: (i)  
49  
50 aged between 16 and 25; (ii) receiving mental health care treatment at the participating  
51  
52 sites; (iii) body mass index (BMI)  $\geq 25$ ; (iv) willing and able to give independent written  
53  
54 informed consent to participate in the study.  
55

56  
57 The exclusion criteria are: (i) intellectual disability (at the discretion of a clinical  
58  
59 psychologist or psychiatrist); (ii) major neurological disorder, medical illness which  
60

1  
2  
3 impacts on cognition, and/or a history of sustained head injury; (iv) not fluent in  
4 English; or (v) an acute psychotic or manic episode that impairs the individual's ability  
5 to give informed consent and/or requires acute clinical treatment.  
6  
7  
8  
9  
10

## 11 **Study Objectives**

12  
13  
14 **Primary** To assess the efficacy of an online 12-week healthy lifestyle psychoeducation  
15 program in improving cardiometabolic parameters (fasting insulin, fasting glucose, the  
16 updated homeostatic model assessment (HOMA2 IR), cholesterol, triglycerides, blood  
17 pressure, BMI and waist circumference) of young people seeking treatment for mental  
18 health related issues.  
19  
20  
21  
22  
23  
24

25  
26 **Secondary** To assess the efficacy of an online 12-week healthy lifestyle  
27 psychoeducation program in improving affective (depressive and anxiety) symptoms  
28 of young people seeking treatment for mental health related issues.  
29  
30  
31  
32

33  
34 **Tertiary** To assess if changes in cardiometabolic health risk factors (fasting insulin,  
35 fasting glucose, triglycerides, HOMA2-IR, cholesterol, blood pressure, BMI and waist  
36 circumference) are associated with changes in affective (depressive and anxiety)  
37 symptom severity.  
38  
39  
40  
41

42 To assess the feasibility and acceptability of the psychoeducation program in a cohort  
43 of young people seeking treatment for mental health related issues.  
44  
45  
46  
47  
48

## 49 **Measures**

50 Key outcome measures targeted for this study are highlighted in **bold type**.  
51  
52  
53

## 54 **Clinician Rated Assessments**

- 1  
2  
3  
4  
5  
6  
7  
8  
9  
10  
11  
12  
13  
14  
15  
16  
17  
18  
19  
20  
21  
22  
23  
24  
25  
26  
27  
28  
29  
30  
31  
32  
33  
34  
35  
36  
37  
38  
39  
40  
41  
42  
43  
44  
45  
46  
47  
48  
49  
50  
51  
52  
53  
54  
55  
56  
57  
58  
59  
60
- i. Diagnostic Assessment: The presence of any DSM-V Disorders will be assessed using the Structured Clinical Interview for DSM-V Disorders (SCID)<sup>69</sup>.
  - ii. Physical Health, Mental Health, Family Health and Treatment History: Current and past health history will be assessed and recorded by trained researchers and study doctors. This includes current medication and any changes in physical and/or mental health treatment being received throughout the trial.
  - iii. The Brief Psychiatric Rating Scale (BPRS) <sup>70</sup>: The BPRS measures psychiatric symptoms including depression, anxiety, hallucinations and unusual behaviour. This scale is one of the most widely used scales to measure psychotic symptoms <sup>71</sup>.
  - i. Clinical Staging <sup>72</sup>: This framework classifies individuals according to the presentation of their mental illness from those in the earliest phases with non-specific clinical presentations (stages 1a 'seeking help'), those at greater-risk with more specific, sub-threshold presentations (stage 1b 'attenuated syndromes') and those who have already reached a threshold for a progressive or recurrent disorder meeting diagnostic criteria (stage 2, 3, or 4) <sup>72-75</sup>.
  - ii. Pathophysiological Mechanisms <sup>76</sup>: The pathophysiological model suggests three possible pathways of illness: (i) neuro-developmental impairments, (ii) circadian dysregulation, and (iii) heightened sensitivity (i.e., stress-reactivity) in the "fear" circuitry. Based on these pathways, three clinical phenotype labels will be assigned to the individual: (i) developmental-psychotic, (ii) mania-fatigue, and (iii) anxiety-depression subtypes.

- 1  
2  
3  
4  
5  
6  
7  
8  
9  
10  
11  
12  
13  
14  
15  
16  
17  
18  
19  
20  
21  
22  
23  
24  
25  
26  
27  
28  
29  
30  
31  
32  
33  
34  
35  
36  
37  
38  
39  
40  
41  
42  
43  
44  
45  
46  
47  
48  
49  
50  
51  
52  
53  
54  
55  
56  
57  
58  
59  
60
- iii. *Clinical Global Impression (CGI*<sup>77</sup>): The CGI provides an indication of the patient's ability to function in context of their history, psychosocial circumstances, symptoms, and behaviour. The CGI comprises two one-item measures evaluating the severity of psychopathology from 1 to 7 (CGI-Severity, CGI-S) and the change from the initiation of treatment on a similar seven-point scale (CGI-Improvement, CGI-I).
  - iv. *The Young Mania Rating Scale (YMRS)*<sup>78</sup>: The YMRS is an eleven-item questionnaire measuring manic episode severity based on patient subjective report and clinical observations during the clinical interview.
  - v. *The Simple Physical Activity Questionnaire (SIMPAQ)*<sup>79</sup>: The SIMPAQ is a five-item clinical tool designed to assess the degree of physical activity in cohorts at high risk of sedentary behaviour. This measure has been used in over 23 countries and can be reliability and validly administered by health professionals<sup>80</sup>.
  - i. *Suicidal ideation and behaviour*: Acute suicidal behaviour will be assessed by item 7.3 of the Comprehensive Assessment of At-Risk Mental States (CAARMS)<sup>81</sup>. The CAARMS is a semi-structured assessment tool designed to evaluate those at ultra-high risk for psychosis. This assessment is only to be administered as a safety measure where the self-report Suicidal Ideation Attributes Scale (SIDAS) score reaches the cut off score of  $\geq 21$  indicating a high risk of suicidal behaviour.
  - ii. *Social and Occupational Assessment Scale (SOFAS) (38)*: The SOFAS is a global rating of the participant's current social and occupational functioning, independent of the overall severity of the individual's psychological symptoms, ranging from 0 to 100, with lower scores indicating

poorer functioning. The SOFAS has been used extensively in clinical research and practice and has good construct validity, interrater reliability, and predictive validity<sup>82 83</sup>.

- iii. **Eating Disorder Examination (EDE)**<sup>84 85</sup>: This structured interview assesses a range of current regular use of eating disorder behaviours, namely binge eating, purging and strict dieting or fasting. This interview has demonstrated good internal consistency and construct validity<sup>86</sup>.

### Self-Report Questionnaires:

- i. **Demographics**: This questionnaire will comprise details on basic demographics (including details of work and education, ethnicity, living circumstances, relationship status), and physical health (height, weight and waist circumference).
- iv. **Kessler Psychological Distress Scale (K-10)**<sup>87 88</sup>: The K-10 is a 10-item version of the Kessler scale that provides a global measure of distress based on anxiety and depressive symptoms over a four-week period. It has high predictive validity and reliability<sup>89</sup>.
- v. **International Physical Activity Questionnaire (IPAQ) - short version**<sup>90</sup>  
**91**: The short version of the International Physical Activity Questionnaires (IPAQ) is a seven-item questionnaire calculating the amount of time spent engaging in sedentary activity; mild, moderate, or vigorous-intensity physical activity. The original IPAQ has been tested across populations and broad age groups and demonstrates good reliability and validity<sup>90</sup>.
- vi. **Somatic and Psychological Health Report (SPHERE 12)**<sup>92</sup>: The SPHERE 12 is a 12-item self-report questionnaire that assesses six



1  
2  
3 psychological (PSYCH subscale) and six physical symptoms (SOMA  
4 subscale) to identify anxiety, depression, and somatisation symptoms in  
5 primary care. The SPHERE-12 has been demonstrated to have high  
6 reliability and validity in populations over the age of 16 <sup>92</sup>.

- 7  
8  
9  
10  
11  
12  
13 vii. **Sleep-wake cycle and chronotype:** Six questions will be asked  
14 concerning time falling asleep, waking up during weekdays and weekends,  
15 hours of sleep, feelings when waking up. Sleep timing items are based on  
16 the Pittsburgh Sleep Quality Index (PSQI)<sup>93</sup>, and Munich Chrono Type  
17 Questionnaire (MCTQ) <sup>94</sup>, while sleep quality items were developed based  
18 on expert agreement in existing literature.  
19  
20  
21  
22  
23  
24  
25  
26  
27 viii. **Pittsburgh Sleep Quality Index (PSQI)**<sup>93</sup>: The PSQI is a 24-item self-  
28 report questionnaire measuring the quality and patterns of sleep. Seven  
29 domains are assessed including subjective sleep quality, sleep latency,  
30 sleep duration, habitual sleep efficiency, sleep disturbances, use of sleeping  
31 medications, and daytime dysfunction over the last month. This scale has  
32 good internal consistency and construct validity <sup>95 96</sup>.  
33  
34  
35  
36  
37  
38  
39  
40  
41  
42  
43  
44  
45  
46  
47  
48  
49  
50  
51  
52  
53  
54  
55  
56  
57  
58  
59  
60  
ix. **The Insomnia Severity Index (ISI)**<sup>97</sup>: The ISI comprises seven items  
assessing the perceived severity of difficulties in initiating sleep, staying  
asleep, early morning awakenings, satisfaction with current sleep pattern,  
interference with daily functioning, noticeability of impairment attributed to  
the sleep problem, and degree of distress or concern caused by the sleep  
problem. This scale has been used widely in clinical research with high  
internal consistency and convergent validity <sup>98</sup>.  
x. **Suicidal Ideation Attributes Scale (SIDAS)** <sup>99</sup>: The SIDAS is a five-item  
self-report questionnaire assessing the frequency, controllability, closeness

1  
2  
3 to attempt, distress, and interference with daily activities over the past  
4  
5 month. The SIDAS has demonstrated high internal consistency and good  
6  
7 convergent validity <sup>100</sup>.

- 8  
9  
10 xi. **Quick Inventory of Depressive Symptomatology – self-report (QIDS-**  
11  
12 **SR)** <sup>101</sup>: The QIDS is a rating scale that assesses the nine criterion symptom  
13  
14 domains (sleep, sad mood, appetite/weight, concentration/ decision  
15  
16 making, self-view, thoughts of death or suicide, general interest, energy  
17  
18 level, and restlessness/agitation) designated by the DSM-IV to diagnose a  
19  
20 major depressive episode. This scale has high internal consistency and  
21  
22 good predictive and concurrent validity <sup>102</sup>.
- 23  
24  
25  
26 xii. **Overall Anxiety Severity Impairment Scale (OASIS)** <sup>103</sup>: The OASIS is a  
27  
28 five-item self-report measure used to assess the frequency and intensity of  
29  
30 anxiety symptoms and the functional impairment associated with any  
31  
32 anxiety disorder or multiple anxiety disorders. This scale has excellent test-  
33  
34 retest reliability, and convergent and discriminant validity <sup>104</sup>.
- 35  
36  
37  
38 xiii. **World Health Organisation (WHO) Alcohol, Smoking and Substance**  
39  
40 **Involvement Screening Test (WHO-ASSIST)** <sup>105 106</sup>: The ASSIST (version  
41  
42 3.1) is an eight-item questionnaire screening for use of tobacco products,  
43  
44 alcohol, cannabis, cocaine, amphetamine-type stimulants (ATS), sedatives  
45  
46 and sleeping pills (benzodiazepines), hallucinogens, inhalants, opioids,  
47  
48 ‘other’ drugs. This scale has demonstrated good validity <sup>107</sup> and reliability  
49  
50  
51 <sup>108</sup>.
- 52  
53  
54 xiv. **Alcohol Use Disorders Identification Test – Consumption (AUDIT-C)** <sup>109</sup>: The  
55  
56 AUDIT-C has three short questions to estimate alcohol consumption in a  
57  
58  
59  
60

standard, meaningful and non-judgemental manner. This scale has shown good reliability and validity in adolescent sample groups <sup>110</sup>.

- xv. **Rosenberg Self-Esteem Scale (RSES)** <sup>111</sup>: The RSES is a 10-item self-report measure of self-esteem, self-worth or self-acceptance designed specifically for use in adolescent populations. Higher scores on this scale indicate higher levels of global self-esteem. This scale has extremely high internal consistency and demonstrated construct validity with other measures of self-esteem <sup>112 113</sup>.
- xvi. **Client Satisfaction Questionnaire-8 (CSQ-8)** <sup>114</sup>: The CSQ is a structured survey used to assess level of satisfaction with care. The CSQ-8 has been found to have high internal consistency and concurrent validity in mental health outpatient settings <sup>114</sup>.
- xvii. **Feedback Questionnaire**. This is an investigator-developed questionnaire specifically relating to the feasibility and acceptability of the psychoeducation program and whether the participants have any feedback or suggestions for improvement to the online psychoeducation program after completion of the program.

## Blood Markers

Blood samples are to be collected in a fasting state between 8:00am and 10:00am by a trained phlebotomist at baseline and week 12 to determine variables of interest including **fasting glucose; fasting insulin, and blood lipids (including triglycerides, total, high density lipoprotein (HDL) and low-density lipoprotein (LDL) cholesterol levels)**. Other blood measures to be collected for monitoring purposes include HbA1c, full blood count, urea, electrolytes, liver function test, C-

1  
2  
3 reactive protein (CRP), erythrocyte sedimentation rate (ESR), antinuclear antibodies  
4  
5 (ANA), vitamin D, vitamin B12, folate, iron, thyroid stimulating hormone, calcium (Ca),  
6  
7 magnesium (Mg) and phosphate (PO<sub>4</sub>) levels. **Insulin resistance** will be estimated  
8  
9 using the updated homeostatic model assessment (**HOMA2-IR**) using iHOMA2  
10  
11 software V.8.8 <sup>115</sup> from fasting blood test results. Metabolic blood measures will be  
12  
13 collected by a standard pathology request, and a de-identified copy of the results will  
14  
15 be kept in the participants' file.  
16  
17  
18  
19  
20

### 21 **Anthropometric Assessments**

22  
23 Measures of **blood pressure, height and weight** will be collected via direct  
24  
25 measurement by a clinician or research staff. **Body mass index (BMI)** will be  
26  
27 calculated using the formula:  $\text{weight(kg)} \div \text{height(m)}^2$ . **Waist circumference** is  
28  
29 measured with the participant standing up, to the nearest 1 cm with a measuring tape  
30  
31 at the midpoint between the bottom of the rib cage and above the top of the iliac crest  
32  
33 (hip bone) at the end of the participant's normal respiration. Where the patient is  
34  
35 unable to visit the Brain and Mind Centre for an anthropometric assessment, the  
36  
37 participant will be required to self-report height and weight and will be instructed how  
38  
39 to gather waist circumference measurements.  
40  
41  
42  
43  
44  
45  
46

### 47 **24-hour Sleep-Wake and Physical Activity Profiling**

48  
49 All participants will wear wrist mounted actigraphy recording devices (GENEActiv  
50  
51 Sleep device; Activinsights, Kimbolton, UK) to record motor activity over a two-week  
52  
53 period for an estimation of sleep and physical activity patterns based on validated  
54  
55 algorithms. Measurements include **sleep onset time, sleep offset time, sleep**  
56  
57 **midpoint**, sleep efficiency, wake after sleep onset (WASO: number of minutes during  
58  
59  
60

1  
2  
3 the sleep period scored as awake), and total sleep time (TST; number of minutes  
4 during the sleep period scored as sleep).  
5  
6

7  
8 Physical activity will be assessed through the GENEActiv devices as gross motor  
9 activity per day (milli-gravity [mg],  $1g = 9.81 \text{ m/s}^2$  ) and **minutes in**  
10 **moderate-to-vigorous physical activity per day** (objective minutes in  
11 moderate-to-vigorous physical activity per day defined as the sum of 1-min epochs in  
12 which gross motor activity was larger than 125 mg) as described in other studies <sup>116</sup>.  
13  
14 The GENEActiv devices have been used widely in clinical research and validated  
15 against several types of accelerometry-based activity monitors <sup>117-120</sup> as well as for  
16 sleep-wake scoring <sup>121 122</sup>.  
17  
18  
19  
20  
21  
22  
23  
24  
25  
26  
27

### 28 **Sample Size/ Power Calculation**

29  
30 The proposed sample size calculation of at least 44 participants is based on specific  
31 power analysis parameters (power analyses completed in G\*Power Version 3.1.9.4),  
32 notably difference in means in HOMA2-IR scores of one sample with a power of 0.90,  
33 an effect size of 0.5, and an alpha level of 0.05. Whilst this is a pilot study, and a  
34 sample size has been estimated, this pilot data will be used to inform power  
35 calculations for future studies investigating similar outcome measures in this specific  
36 cohort.  
37  
38  
39  
40  
41  
42  
43  
44  
45  
46  
47  
48

### 49 **Data Analysis Plan**

50  
51 All data will be entered into a secure password protected database and statistical  
52 analyses conducted in R statistical software. The primary and secondary objectives  
53 will be analysed by a change in mean scores of all outcome measures after completion  
54 of the 12-week online psychoeducation program via a paired samples t-test, with  
55  
56  
57  
58  
59  
60

1  
2  
3 significance levels set at  $\alpha=.05$ . To assess the tertiary objectives, correlations will be  
4 performed between all cardiometabolic change scores and affective outcome change  
5 scores via Pearson's or Spearman's correlations tests based on normative or non-  
6 normative data distribution; with a significance level set at  $\alpha=.05$ . Overall completion  
7 rates of the study will be used to assess feasibility, and the average of the CSQ-8  
8 scores will be used to assess acceptability.  
9  
10  
11  
12  
13  
14  
15  
16  
17  
18

### 19 **Ethics**

20  
21 The Sydney Local Health District (RPAH Division) Human Ethics Research (HREC)  
22 Committee has approved this study (X20-0228). The online psychoeducation program  
23 is designed as an adjunct, not an alternative, to standard clinical treatments offered  
24 by the youth mental health services. As such, all participants are encouraged to  
25 continue to follow the healthcare advice of their treating clinicians and to remain in  
26 their care, as well as participating in the online psychoeducation sessions. This  
27 standard treatment may include medication, counselling, psychological therapy and/or  
28 referrals to a range of specialist mental health treatments or services.  
29  
30  
31  
32  
33  
34  
35  
36  
37  
38  
39  
40  
41

42 The headspace, Camperdown clinic is an established, specialised clinic for the youth  
43 mental health population. As such, the clinic has its own internal crisis management  
44 plans and are staffed with leading expertise in managing patient distress and  
45 unexpected occurrences for the youth mental population. As a further precaution,  
46 questions about suicidal ideation or self-harm will be asked in weeks 1, 4, 8, and 12  
47 in the monitoring phone call. If there is an indication of suicidal intent, the CAARMS  
48 will be administered and suicidality standard operating protocol will be followed. Any  
49 adverse events will be logged into an Adverse Event Monitoring Log.  
50  
51  
52  
53  
54  
55  
56  
57  
58  
59  
60

## Dissemination

In accordance with the guidelines stipulated by the funding bodies, the results of this study will be disseminated as widely as possible into the scientific and broader community. This may include publication in peer-reviewed journals, scholarly book chapters, presentation at conferences and publication in conference proceedings. In accordance with NHMRC policy, publications arising from this study will be deposited into an open access institutional repository, where possible. It is also intended for results to be disseminated into the wider community in a format appropriate for a lay audience, through links including the Brain and Mind Centre website and social media, as well as newsletters.

## Discussion

This clinical pilot trial plans to evaluate the efficacy, feasibility and acceptability of a 12 week online psychoeducation program (involving structured nutrition, physical activity, sleep-wake and healthy lifestyle information) on several cardiometabolic risk factors and affective symptoms in youth seeking treatment for mental ill-health. The multidimensional modules feature a youth-friendly format, with input from those with lived experience, to maximise engagement by young people. If the findings of this exploratory trial demonstrate benefits in each of the targeted domains, it will be used as a basis for further clinical trials incorporating more intensive psychoeducation combined with pharmacological therapies. Due to the online nature of the psychoeducation program, there is also potential for a larger-scale study to be implemented across a number of centres nationally, allowing individuals to access the program remotely and regionally.

1  
2  
3 Whilst this pilot study will provide important information about how multidisciplinary  
4 behavioural modification programs may help to manage the immediate  
5 cardiometabolic and mental health symptoms (including affective, anxiety and  
6 psychotic symptoms) of young people receiving mental health care, it cannot draw  
7 conclusions about the long-term implications of these lifestyle changes on the  
8 assessed domains. Additionally, as this is a single-arm pilot study, it cannot determine  
9 the efficacy of the intervention compared to other behavioural interventions in the  
10 same cohort. Future research should thus aim to monitor participants over longer  
11 periods of time whilst comparing to other pharmacological (for example metformin) or  
12 behavioural interventions.  
13  
14  
15  
16  
17  
18  
19  
20  
21  
22  
23  
24  
25  
26  
27

### 28 **Trial Status**

29 The trial has not begun recruitment.  
30  
31  
32  
33  
34

### 35 **Funding and Sponsor**

36 This project is an investigator-initiated study, sponsored by the University of Sydney  
37 and supported by philanthropic funding, for which donor(s) are families affected by  
38 mental illness who wish to remain anonymous. This study was also partially funded by  
39 a philanthropic PhD scholarship (The Liu McCabe Family Scholarship awarded to  
40 C.W), a National Health & Medical Research Council Australia Fellowship (No.  
41 511921, awarded to I.B.H) and a philanthropic fellowship (the Caroline Quinn  
42 Research Grant awarded to J.C). The funders of this study had no involvement in the:  
43 study design; collection, analysis and reporting of the data; writing of the report; or  
44 decision to submit the paper for publication.  
45  
46  
47  
48  
49  
50  
51  
52  
53  
54  
55  
56  
57  
58  
59  
60



### Author's Contributions

C.E.W. has developed this clinical trial as part of her PhD research project and drafted this original manuscript with input from other authors. I.B.H assisted with the design of the study. A.N., N.Z., J.S.C., Y.S., C.M., B.H., S.H. and E.S. were all involved with modifications to the design of the study and with drafting of this paper. All authors have read and approved the final manuscript.

### Competing Interests Statement

Professor Ian Hickie was an inaugural Commissioner on Australia's National Mental Health Commission (2012-18). He is the Co-Director, Health and Policy at the Brain and Mind Centre (BMC) University of Sydney. The BMC operates early-intervention youth services at Camperdown under contract to *headspace*. He is the Chief Scientific Advisor to, and a 5% equity shareholder in, InnoWell Pty Ltd. InnoWell was formed by the University of Sydney (45% equity) and PwC (Australia; 45% equity) to deliver the \$30M Australian Government-funded Project Synergy (2017-20; a three-year program for the transformation of mental health services) and to lead transformation of mental health services internationally through the use of innovative technologies.

## References

1. Liu NH, Daumit GL, Dua T, et al. Excess mortality in persons with severe mental disorders: a multilevel intervention framework and priorities for clinical practice, policy and research agendas. *World psychiatry* 2017;16(1):30-40.
2. Chesney E, Goodwin GM, Fazel S. Risks of all-cause and suicide mortality in mental disorders: a meta-review. *World Psychiatry* 2014;13(2):153-60.
3. Laursen TM, Musliner KL, Benros ME, et al. Mortality and life expectancy in persons with severe unipolar depression. *Journal of affective disorders* 2016;193:203-07.
4. Cuijpers P, Vogelzangs N, Twisk J, et al. Comprehensive meta-analysis of excess mortality in depression in the general community versus patients with specific illnesses. *American journal of psychiatry* 2014;171(4):453-62.
5. Hayes J, Miles J, Walters K, et al. A systematic review and meta-analysis of premature mortality in bipolar affective disorder. *Acta Psychiatrica Scandinavica* 2015;131(6):417-25.
6. Roberts LW, Louie AK, Guerrero APS, et al. Premature Mortality Among People with Mental Illness: Advocacy in Academic Psychiatry. *Academic Psychiatry* 2017;41(4):441-46. doi: 10.1007/s40596-017-0738-9
7. Feliciano EMC, Quante M, Rifas-Shiman SL, et al. Objective sleep characteristics and cardiometabolic health in young adolescents. *Pediatrics* 2018;142(1):e20174085.
8. Quante M, Feliciano EMC, Rifas-Shiman SL, et al. Association of Daily Rest-Activity Patterns With Adiposity and Cardiometabolic Risk Measures in Teens. *Journal of Adolescent Health* 2019
9. Grandner MA, Jackson NJ, Pak VM, et al. Sleep disturbance is associated with cardiovascular and metabolic disorders. *Journal of sleep research* 2012;21(4):427-33.
10. Ringen PA, Faerden A, Antonsen B, et al. Cardiometabolic risk factors, physical activity and psychiatric status in patients in long-term psychiatric inpatient departments. *Nordic journal of psychiatry* 2018;72(4):296-302.
11. Scheewe T, Jörg F, Takken T, et al. Low physical activity and Cardiorespiratory fitness in people with schizophrenia: a comparison with matched healthy controls and associations with mental and physical health. *Frontiers in psychiatry* 2019;10:87.
12. Vancampfort D, Stubbs B. Physical activity and metabolic disease among people with affective disorders: Prevention, management and implementation. *Journal of Affective Disorders* 2017;224:87-94. doi: <https://doi.org/10.1016/j.jad.2016.07.042>
13. Vancampfort D, Firth J, Schuch F, et al. Physical activity and sedentary behavior in people with bipolar disorder: a systematic review and meta-analysis. *Journal of affective disorders* 2016;201:145-52.
14. Vancampfort D, Firth J, Schuch FB, et al. Sedentary behavior and physical activity levels in people with schizophrenia, bipolar disorder and major depressive disorder: a global systematic review and meta-analysis. *World Psychiatry* 2017;16(3):308-15.
15. Schuch F, Vancampfort D, Firth J, et al. Physical activity and sedentary behavior in people with major depressive disorder: a systematic review and meta-analysis. *Journal of affective disorders* 2017;210:139-50.
16. Vancampfort D, Sienaert P, Wyckaert S, et al. Sitting time, physical fitness impairments and metabolic abnormalities in people with bipolar disorder: An exploratory study. *Psychiatry Research* 2016;242:7-12. doi: <https://doi.org/10.1016/j.psychres.2016.05.023>

17. Soreca I, Wallace M, Hall M, et al. The association between meal timing and frequency with cardiometabolic profile in patients with bipolar disorder. *Acta Psychiatrica Scandinavica* 2016;133(6):453-58.
18. Teasdale SB, Ward PB, Samaras K, et al. Dietary intake of people with severe mental illness: systematic review and meta-analysis. *The British Journal of Psychiatry* 2019;214(5):251-59.
19. Firth J, Stubbs B, Teasdale SB, et al. Diet as a hot topic in psychiatry: a population-scale study of nutritional intake and inflammatory potential in severe mental illness. *World Psychiatry* 2018;17(3):365.
20. Barker MK, Sable CM, Montgomery SE, et al. Diet and cardiometabolic side effects in children treated with second-generation antipsychotics. *Clinical nutrition ESPEN* 2018;23:205-11.
21. Mallet J, Le Strat Y, Schürhoff F, et al. Tobacco smoking is associated with antipsychotic medication, physical aggressiveness, and alcohol use disorder in schizophrenia: results from the FACE-SZ national cohort. *European archives of psychiatry and clinical neuroscience* 2019;269(4):449-57.
22. Jackson JG, Diaz FJ, Lopez L, et al. A combined analysis of worldwide studies demonstrates an association between bipolar disorder and tobacco smoking behaviors in adults. *Bipolar Disorders* 2015;17(6):575-97.
23. Richardson S, McNeill A, Brose LS. Smoking and quitting behaviours by mental health conditions in Great Britain (1993–2014). *Addictive behaviors* 2019;90:14-19.
24. Prochaska JJ, Das S, Young-Wolff KC. Smoking, mental illness, and public health. *Annual Review of Public Health* 2017;38:165-85.
25. Callaghan RC, Veldhuizen S, Jeysingh T, et al. Patterns of tobacco-related mortality among individuals diagnosed with schizophrenia, bipolar disorder, or depression. *Journal of psychiatric research* 2014;48(1):102-10.
26. Weinberger AH, Streck JM, Pacek LR, et al. Nondaily Cigarette Smoking Is Increasing Among People With Common Mental Health and Substance Use Problems in the United States:: Data From Representative Samples of US Adults, 2005–2014. *The Journal of clinical psychiatry* 2018;79(5)
27. Seida JC, Schouten JR, Boylan K, et al. Antipsychotics for children and young adults: a comparative effectiveness review. *Pediatrics* 2012;129(3):e771-e84.
28. Cheng-Shannon J, McGough JJ, Pataki C, et al. Second-generation antipsychotic medications in children and adolescents. *Journal of Child & Adolescent Psychopharmacology* 2004;14(3):372-94.
29. Pillay J, Boylan K, Carrey N, et al. First-and second-generation antipsychotics in children and young adults: systematic review update. 2017
30. Jerrell JM, McIntyre RS. Adverse events in children and adolescents treated with antipsychotic medications. *Human Psychopharmacology: Clinical and Experimental* 2008;23(4):283-90.
31. De Hert M, Yu W, Detraux J, et al. Body weight and metabolic adverse effects of aripiprazole, iloperidone, lurasidone and paliperidone in the treatment of schizophrenia and bipolar disorder. *CNS drugs* 2012;26(9):733-59.
32. Ngai YF, Sabatini P, Nguyen D, et al. Quetiapine treatment in youth is associated with decreased insulin secretion. *Journal of clinical psychopharmacology* 2014;34(3):359-64.

- 1
- 2
- 3
- 4 33. Panagiotopoulos C, Ronsley R, Davidson J. Increased prevalence of obesity and glucose
- 5 intolerance in youth treated with second—generation antipsychotic medications.
- 6 *The Canadian Journal of Psychiatry* 2009;54(11):743-49.
- 7
- 8 34. Scott EM, Hermens DF, White D, et al. Body mass, cardiovascular risk and metabolic
- 9 characteristics of young persons presenting for mental healthcare in Sydney,
- 10 Australia. *BMJ open* 2015;5(3):e007066.
- 11
- 12 35. Fraguas D, Correll CU, Merchán-Naranjo J, et al. Efficacy and safety of second-generation
- 13 antipsychotics in children and adolescents with psychotic and bipolar spectrum
- 14 disorders: comprehensive review of prospective head-to-head and placebo-
- 15 controlled comparisons. *European Neuropsychopharmacology* 2011;21(8):621-45.
- 16
- 17 36. Zuddas A, Zanni R, Usala T. Second generation antipsychotics (SGAs) for non-psychotic
- 18 disorders in children and adolescents: a review of the randomized controlled studies.
- 19 *European Neuropsychopharmacology* 2011;21(8):600-20.
- 20
- 21 37. Martínez-Ortega JM, Funes-Godoy S, Díaz-Atienza F, et al. Weight gain and increase of
- 22 body mass index among children and adolescents treated with antipsychotics: a
- 23 critical review. *European child & adolescent psychiatry* 2013;22(8):457-79.
- 24
- 25 38. Baeza I, Vigo L, de la Serna E, et al. The effects of antipsychotics on weight gain, weight-
- 26 related hormones and homocysteine in children and adolescents: a 1-year follow-up
- 27 study. *European child & adolescent psychiatry* 2017;26(1):35-46.
- 28
- 29 39. Stigler KA, Potenza MN, Posey DJ, et al. Weight gain associated with atypical
- 30 antipsychotic use in children and adolescents. *Pediatric Drugs* 2004;6(1):33-44.
- 31
- 32 40. De Hert M, Dobbelaere M, Sheridan EM, et al. Metabolic and endocrine adverse effects
- 33 of second-generation antipsychotics in children and adolescents: A systematic
- 34 review of randomized, placebo controlled trials and guidelines for clinical practice.
- 35 *European Psychiatry* 2011;26(3):144-58. doi:
- 36 <https://doi.org/10.1016/j.eurpsy.2010.09.011>
- 37
- 38 41. Correll CU, Carlson HE. Endocrine and metabolic adverse effects of psychotropic
- 39 medications in children and adolescents. *Journal of the American Academy of Child &*
- 40 *Adolescent Psychiatry* 2006;45(7):771-91.
- 41
- 42 42. Maayan L, Correll CU. Weight gain and metabolic risks associated with antipsychotic
- 43 medications in children and adolescents. *Journal of child and adolescent*
- 44 *psychopharmacology* 2011;21(6):517-35.
- 45
- 46 43. Correll CU, Manu P, Olshanskiy V, et al. Cardiometabolic Risk of Second-Generation
- 47 Antipsychotic Medications During First-Time Use in Children and Adolescents. *JAMA*
- 48 2009;302(16):1765-73. doi: 10.1001/jama.2009.1549
- 49
- 50 44. Arango C, Robles O, Parellada M, et al. Olanzapine compared to quetiapine in
- 51 adolescents with a first psychotic episode. *European child & adolescent psychiatry*
- 52 2009;18(7):418.
- 53
- 54 45. Safer DJ. A comparison of risperidone-induced weight gain across the age span. *Journal*
- 55 *of clinical psychopharmacology* 2004;24(4):429-36.
- 56
- 57 46. Briguglio M, Vitale JA, Galentino R, et al. Healthy eating, physical activity, and sleep
- 58 hygiene (HEPAS) as the winning triad for sustaining physical and mental health in
- 59 patients at risk for or with neuropsychiatric disorders: considerations for clinical
- 60 practice. *Neuropsychiatric disease and treatment* 2020;16:55.
47. WHO. Management of physical health conditions in adults with severe mental disorders: WHO guidelines. 2018

- 1
- 2
- 3 48. Gluth A, White D, Ward M. Lifestyle interventions in patients with serious mental illness. *Lifestyle in Heart Health and Disease*: Elsevier 2018:247-53.
- 4
- 5
- 6 49. Parker AG, Bailey AP. Exercise for adolescents and young people with mental illness. *Exercise-Based Interventions for Mental Illness*: Elsevier 2018:149-67.
- 7
- 8 50. De Rosa C, Sampogna G, Luciano M, et al. Improving physical health of patients with severe mental disorders: a critical review of lifestyle psychosocial interventions. *Expert review of neurotherapeutics* 2017;17(7):667-81.
- 9
- 10
- 11 51. Rönngren Y, Björk A, Audulv Å, et al. Educational nurse-led lifestyle intervention for persons with mental illness. *International journal of mental health nursing* 2018;27(3):1022-31.
- 12
- 13
- 14 52. Fiorillo A, Luciano M, Pompili M, et al. Reducing the Mortality Gap in People With Severe Mental Disorders: The Role of Lifestyle Psychosocial Interventions. *Frontiers in psychiatry* 2019;10
- 15
- 16 53. Taylor CI, Tompsett C, Sanders R, et al. The effectiveness of structured exercise programmes on psychological and physiological outcomes for patients with psychotic disorders: A systematic review and meta-analysis. *International Journal of Sport and Exercise Psychology* 2018:1-26.
- 17
- 18
- 19 54. Goracci A, Rucci P, Forgione R, et al. Development, acceptability and efficacy of a standardized healthy lifestyle intervention in recurrent depression. *Journal of affective disorders* 2016;196:20-31.
- 20
- 21
- 22 55. Murphy JA, Oliver G, Ng C, et al. Pilot-Testing of “Healthy Body Healthy Mind”: An Integrative Lifestyle Program for Patients With a Mental Illness and Co-morbid Metabolic Syndrome. *Frontiers in psychiatry* 2019;10:91.
- 23
- 24
- 25 56. Bersani FS, Biondi M, Coviello M, et al. Psychoeducational intervention focused on healthy living improves psychopathological severity and lifestyle quality in psychiatric patients: preliminary findings from a controlled study. *Journal of Mental Health* 2017;26(3):271-75.
- 26
- 27
- 28 57. Gurusamy J, Gandhi S, Damodharan D, et al. Exercise, diet and educational interventions for metabolic syndrome in persons with schizophrenia: a systematic review. *Asian Journal of Psychiatry* 2018;36:73-85.
- 29
- 30
- 31 58. Rosenbaum S, Newby JM, Steel Z, et al. Online physical activity interventions for mental disorders: A systematic review. *Internet Interventions* 2015;2(2):214-20.
- 32
- 33 59. Deenik J, Tenback DE, Tak EC, et al. Changes in physical and psychiatric health after a multidisciplinary lifestyle enhancing treatment for inpatients with severe mental illness: The MULTI study I. *Schizophrenia research* 2019;204:360-67.
- 34
- 35
- 36 60. Lambert JD, Greaves CJ, Farrand P, et al. Web-based intervention using behavioral activation and physical activity for adults with depression (the eMotion study): pilot randomized controlled trial. *Journal of medical Internet research* 2018;20(7):e10112.
- 37
- 38
- 39 61. Parker AG, Markulev C, Rickwood DJ, et al. Improving Mood with Physical ACTivity (IMPACT) trial: a cluster randomised controlled trial to determine the effectiveness of a brief physical activity behaviour change intervention on depressive symptoms in young people, compared with psychoeducation, in addition to routine clinical care within youth mental health services—a protocol study. *BMJ open* 2019;9(10)
- 40
- 41
- 42 62. Nasstasia Y, Baker AL, Halpin SA, et al. Evaluating the efficacy of an integrated motivational interviewing and multi-modal exercise intervention for youth with major depression: Healthy Body, Healthy Mind randomised controlled trial protocol. *Contemporary clinical trials communications* 2018;9:13-22.
- 43
- 44
- 45
- 46
- 47
- 48
- 49
- 50
- 51
- 52
- 53
- 54
- 55
- 56
- 57
- 58
- 59
- 60

- 1
  - 2
  - 3
  - 4
  - 5
  - 6
  - 7
  - 8
  - 9
  - 10
  - 11
  - 12
  - 13
  - 14
  - 15
  - 16
  - 17
  - 18
  - 19
  - 20
  - 21
  - 22
  - 23
  - 24
  - 25
  - 26
  - 27
  - 28
  - 29
  - 30
  - 31
  - 32
  - 33
  - 34
  - 35
  - 36
  - 37
  - 38
  - 39
  - 40
  - 41
  - 42
  - 43
  - 44
  - 45
  - 46
  - 47
  - 48
  - 49
  - 50
  - 51
  - 52
  - 53
  - 54
  - 55
  - 56
  - 57
  - 58
  - 59
  - 60
63. Parker AG, Hetrick SE, Jorm AF, et al. The effectiveness of simple psychological and physical activity interventions for high prevalence mental health problems in young people: a factorial randomised controlled trial. *Journal of affective disorders* 2016;196:200-09.
64. Robillard R, Hermens DF, Naismith SL, et al. Ambulatory sleep-wake patterns and variability in young people with emerging mental disorders. *Journal of Psychiatry & Neuroscience* 2014;In Press
65. Harvey AG, Mullin BC, Hinshaw SP. Sleep and circadian rhythms in children and adolescents with bipolar disorder. *Development and psychopathology* 2006;18(4):1147-68. doi: 10.1017/S095457940606055X
66. Cousins JC, Whalen DJ, Dahl RE, et al. The bidirectional association between daytime affect and nighttime sleep in youth with anxiety and depression. *Journal of pediatric psychology* 2011;36(9):969-79. doi: 10.1093/jpepsy/jsr036
67. Minassian A, Henry BL, Geyer MA, et al. The quantitative assessment of motor activity in mania and schizophrenia. *Journal of affective disorders* 2010;120(1-3):200-6. doi: 10.1016/j.jad.2009.04.018
68. Rohleder C, Song YJC, Crouse JJ, et al. Youth Mental Health Tracker: protocol to establish a longitudinal cohort and research database for young people attending Australian mental health services. *BMJ Open* 2020;10(6):e035379. doi: 10.1136/bmjopen-2019-035379
69. American Psychiatric Association. Diagnostic and statistical manual of mental disorders. 5th ed. Arlington, VA2013.
70. Overall JE, Gorham DR. The brief psychiatric rating scale. *Psychol Rep* 1962;10:799-812.
71. Bell M, Milstein R, Beam-Goulet J, et al. The Positive and Negative Syndrome Scale and the Brief Psychiatric Rating Scale: reliability, comparability, and predictive validity. *Journal of Nervous and Mental Disease* 1992
72. Hickie IB, Scott EM, Hermens DF, et al. Applying clinical staging to young people who present for mental health care. *Early Intervention in Psychiatry* 2013;7(1):31-43.
73. McGorry PD, Hickie IB, Yung AR, et al. Clinical staging of psychiatric disorders: a heuristic framework for choosing earlier, safer and more effective interventions. *The Australian and New Zealand journal of psychiatry* 2006;40(8):616-22. doi: 10.1080/j.1440-1614.2006.01860.x [published Online First: 2006/07/27]
74. Scott J, Leboyer M, Hickie I, et al. Clinical staging in psychiatry: a cross-cutting model of diagnosis with heuristic and practical value. *British Journal of Psychiatry* 2013;202(4):243-45. doi: 10.1192/bjp.bp.112.110858 [published Online First: 2018/01/02]
75. Hickie IB, Scott J, McGorry PD. Clinical staging for mental disorders: a new development in diagnostic practice in mental health. *Med J Aust* 2013;198(9):461-2. [published Online First: 2013/05/21]
76. Hickie IB, Hermens DF, Naismith SL, et al. Evaluating differential developmental trajectories to adolescent-onset mood and psychotic disorders. *BMC psychiatry* 2013;13:303. doi: 10.1186/1471-244x-13-303 [published Online First: 2013/11/13]
77. Busner J, Targum SD. The Clinical Global Impressions Scale: Applying a Research Tool in Clinical Practice. *Psychiatry (Edgmont)* 2007;4(7):28-37.
78. Young R, Biggs J, Ziegler V, et al. A rating scale for mania: reliability, validity and sensitivity. *The British Journal of Psychiatry* 1978;133(5)

- 1
- 2
- 3
- 4 79. Rosenbaum S, Ward PB. The simple physical activity questionnaire. *The Lancet Psychiatry* 2016;3(1):e1.
- 5
- 6 80. Rosenbaum S, Morell R, Abdel-Baki A, et al. Assessing physical activity in people with
- 7 mental illness: 23-country reliability and validity of the simple physical activity
- 8 questionnaire (SIMPAQ). *Bmc Psychiatry* 2020;20(1):1-12.
- 9
- 10 81. Yung AR, Yuen HP, McGorry PD, et al. Mapping the onset of psychosis: the
- 11 Comprehensive Assessment of At-Risk Mental States. *Aust N Z J Psychiatry*
- 12 2005;39:964-71.
- 13
- 14 82. Hilsenroth MJ, Ackerman SJ, Blagys MD, et al. Reliability and validity of DSM-IV axis V.
- 15 *American Journal of Psychiatry* 2000;157(11):1858-63.
- 16
- 17 83. Hay P, Katsikitis M, Begg J, et al. A two-year follow-up study and prospective evaluation
- 18 of the DSM-IV axis V. *Psychiatric Services* 2003;54(7):1028-30.
- 19
- 20 84. Hay PJ, Mond J, Buttner P, et al. Eating disorder behaviors are increasing: findings from
- 21 two sequential community surveys in South Australia. *PLoS ONE* 2008;3(2):e1541.
- 22 doi: 10.1371/journal.pone.0001541 [published Online First: 2008/02/07]
- 23
- 24 85. Mitchison D, Hay P, Slewa-Younan S, et al. The changing demographic profile of eating
- 25 disorder behaviors in the community. *BMC public health* 2014;14:943. doi:
- 26 10.1186/1471-2458-14-943 [published Online First: 2014/09/13]
- 27
- 28 86. Berg KC, Peterson CB, Frazier P, et al. Psychometric evaluation of the eating disorder
- 29 examination and eating disorder examination-questionnaire: A systematic review of
- 30 the literature. *International Journal of Eating Disorders* 2012;45(3):428-38.
- 31
- 32 87. Kessler RC, Andrews G, Colpe LJ, et al. Short screening scales to monitor population
- 33 prevalences and trends in non-specific psychological distress. *Psychol Med*
- 34 2002;32(6):959-76. [published Online First: 2002/09/07]
- 35
- 36 88. Andrews G, Slade T. Interpreting scores on the Kessler Psychological Distress Scale (K10).
- 37 *Australian and New Zealand journal of public health* 2001;25(6):494-7. [published
- 38 Online First: 2002/02/05]
- 39
- 40 89. Smout MF. The factor structure and predictive validity of the Kessler Psychological
- 41 Distress Scale (K10) in children and adolescents. *Australian Psychologist*
- 42 2019;54(2):102-13.
- 43
- 44 90. Craig CL, Marshall AL, Sjoström M, et al. International physical activity questionnaire: 12-
- 45 country reliability and validity. *Med Sci Sports Exerc* 2003;35(8):1381-95. doi:
- 46 10.1249/01.MSS.0000078924.61453.FB [published Online First: 2003/08/06]
- 47
- 48 91. Booth M. Assessment of physical activity: an international perspective. *Res Q Exerc Sport*
- 49 2000;71(2 Suppl):S114-20. [published Online First: 2000/08/05]
- 50
- 51 92. Berryman C, McAuley JH, Moseley LG. Sphere 12 screening questionnaire. *Journal of*
- 52 *Physiotherapy* 2012;58(4):273.
- 53
- 54 93. Smyth C. The Pittsburgh sleep quality index (PSQI). *Journal of gerontological nursing*
- 55 1999;25(12):10-10.
- 56
- 57 94. Shahid A, Wilkinson K, Marcu S, et al. Munich Chronotype Questionnaire (MCTQ). STOP,
- 58 THAT and One Hundred Other Sleep Scales: Springer 2011:245-47.
- 59
95. Raniti MB, Waloszek JM, Schwartz O, et al. Factor structure and psychometric properties
- of the Pittsburgh Sleep Quality Index in community-based adolescents. *Sleep*
- 2018;41(6):zsy066.
96. Carpenter JS, Andrykowski MA. Psychometric evaluation of the Pittsburgh sleep quality
- index. *Journal of psychosomatic research* 1998;45(1):5-13.
97. Morin CM. Insomnia: psychological assessment and management: Guilford press 1993.

- 1  
2  
3 98. Morin CM, Belleville G, Bélanger L, et al. The Insomnia Severity Index: psychometric  
4 indicators to detect insomnia cases and evaluate treatment response. *Sleep*  
5 2011;34(5):601-08.  
6
- 7 99. van Spijker BA, Batterham PJ, Clear AL, et al. The suicidal ideation attributes scale  
8 (SIDAS): Community-based validation study of a new scale for the measurement of  
9 suicidal ideation. *Suicide & life-threatening behavior* 2014;44(4):408-19. doi:  
10 10.1111/sltb.12084 [published Online First: 2014/03/13]  
11
- 12 100. AJ B, Spijker P, BATTERHAM PJ, et al. The Suicidal Ideation Attributes Scale (SIDAS):  
13 Community-Based Validation Study of a New Scale for the Measurement of Suicidal  
14 Ideation. 2014  
15
- 16 101. Rush AJ, Trivedi MH, Ibrahim HM, et al. The 16-Item Quick Inventory of Depressive  
17 Symptomatology (QIDS), clinician rating (QIDS-C), and self-report (QIDS-SR): a  
18 psychometric evaluation in patients with chronic major depression. *Biol Psychiatry*  
19 2003;54(5):573-83. [published Online First: 2003/08/30]  
20
- 21 102. Rush AJ, Trivedi MH, Ibrahim HM, et al. The 16-Item Quick Inventory of Depressive  
22 Symptomatology (QIDS), clinician rating (QIDS-C), and self-report (QIDS-SR): a  
23 psychometric evaluation in patients with chronic major depression. *Biological*  
24 *psychiatry* 2003;54(5):573-83.  
25
- 26 103. Norman SB, Cissell SH, Means-Christensen AJ, et al. Development and validation of an  
27 Overall Anxiety Severity And Impairment Scale (OASIS). *Depress Anxiety*  
28 2006;23(4):245-9. doi: 10.1002/da.20182 [published Online First: 2006/05/12]  
29
- 30 104. Norman SB, Hami Cissell S, Means-Christensen AJ, et al. Development and validation of  
31 an overall anxiety severity and impairment scale (OASIS). *Depression and anxiety*  
32 2006;23(4):245-49.  
33
- 34 105. Humeniuk R, Ali R, Babor TF, et al. Validation of the Alcohol, Smoking And Substance  
35 Involvement Screening Test (ASSIST). *Addiction* 2008;103(6):1039-47. doi:  
36 10.1111/j.1360-0443.2007.02114.x [published Online First: 2008/04/01]  
37
- 38 106. WHO ASSIST Working Group. The Alcohol, Smoking and Substance Involvement  
39 Screening Test (ASSIST): development, reliability and feasibility. *Addiction*  
40 2002;97(9):1183-94. [published Online First: 2002/08/30]  
41
- 42 107. Newcombe DA, Humeniuk RE, Ali R. Validation of the world health organization  
43 alcohol, smoking and substance involvement screening test (ASSIST): report of  
44 results from the Australian site. *Drug and alcohol review* 2005;24(3):217-26.  
45
- 46 108. Group WAW. The alcohol, smoking and substance involvement screening test (ASSIST):  
47 development, reliability and feasibility. *Addiction* 2002;97(9):1183-94.  
48
- 49 109. Bush K, Kivlahan DR, McDonnell MB, et al. The AUDIT alcohol consumption questions  
50 (AUDIT-C): an effective brief screening test for problem drinking. Ambulatory Care  
51 Quality Improvement Project (ACQUIP). Alcohol Use Disorders Identification Test.  
52 *Archives of internal medicine* 1998;158(16):1789-95. [published Online First:  
53 1998/09/17]  
54
- 55 110. de Meneses-Gaya C, Zuardi AW, Loureiro SR, et al. Alcohol Use Disorders Identification  
56 Test (AUDIT): An updated systematic review of psychometric properties. *Psychology*  
57 *& Neuroscience* 2009;2(1):83.  
58
- 59 111. Rosenberg M. Rosenberg self-esteem scale (RSE). *Acceptance and commitment therapy*  
60 *Measures package* 1965;61(52):18.



- 1  
2  
3  
4  
5  
6  
7  
8  
9  
10  
11  
12  
13  
14  
15  
16  
17  
18  
19  
20  
21  
22  
23  
24  
25  
26  
27  
28  
29  
30  
31  
32  
33  
34  
35  
36  
37  
38  
39  
40  
41  
42  
43  
44  
45  
46  
47  
48  
49  
50  
51  
52  
53  
54  
55  
56  
57  
58  
59  
60
112. Robins RW, Hendin HM, Trzesniewski KH. Measuring global self-esteem: Construct validation of a single-item measure and the Rosenberg Self-Esteem Scale. *Personality and social psychology bulletin* 2001;27(2):151-61.
113. Bagley C, Mallick K. Normative data and mental health construct validity for the Rosenberg Self-Esteem Scale in British Adolescents. *International Journal of Adolescence and Youth* 2001;9(2-3):117-26.
114. Larsen DL, Attkisson CC, Hargreaves WA, et al. Assessment of client/patient satisfaction: development of a general scale. *Evaluation and program planning* 1979;2(3):197-207.
115. Hill NR, Levy JC, Matthews DR. Expansion of the homeostasis model assessment of  $\beta$ -cell function and insulin resistance to enable clinical trial outcome modeling through the interactive adjustment of physiology and treatment effects: iHOMA2. *Diabetes care* 2013;36(8):2324-30.
116. Difrancesco S, Lamers F, Riese H, et al. Sleep, circadian rhythm, and physical activity patterns in depressive and anxiety disorders: A 2-week ambulatory assessment study. *Depression and anxiety* 2019;36(10):975-86.
117. Schaefer CA, Nigg CR, Hill JO, et al. Establishing and evaluating wrist cutpoints for the GENEActiv accelerometer in youth. *Medicine and science in sports and exercise* 2014;46(4):826-33. doi: 10.1249/MSS.0000000000000150
118. Hildebrand M, VT VANH, Hansen BH, et al. Age group comparability of raw accelerometer output from wrist- and hip-worn monitors. *Medicine and science in sports and exercise* 2014;46(9):1816-24. doi: 10.1249/MSS.0000000000000289
119. Esliger DW, Rowlands AV, Hurst TL, et al. Validation of the GENEA Accelerometer. *Medicine and science in sports and exercise* 2011;43(6):1085-93. doi: 10.1249/MSS.0b013e31820513be
120. van Hees VT, Gorzelniak L, Dean Leon EC, et al. Separating movement and gravity components in an acceleration signal and implications for the assessment of human daily physical activity. *PLoS ONE* 2013;8(4):e61691. doi: 10.1371/journal.pone.0061691 [published Online First: 2013/04/30]
121. te Lindert BH, Van Someren EJ. Sleep estimates using microelectromechanical systems (MEMS). *Sleep* 2013;36(5):781-9. doi: 10.5665/sleep.2648
122. van Hees VT, Sabia S, Anderson KN, et al. A Novel, Open Access Method to Assess Sleep Duration Using a Wrist-Worn Accelerometer. *PLoS ONE* 2015;10(11):e0142533. doi: 10.1371/journal.pone.0142533

# BMJ Open

**The effect of an online healthy lifestyle psychoeducation program to improve cardiometabolic outcomes and affective symptoms in youth receiving mental health care: study protocol for a pilot clinical trial.**

|                                 |                                                                                                                                                                                                                                                                                                                                                                                                                                                                                                                                                                                                                                                                                              |
|---------------------------------|----------------------------------------------------------------------------------------------------------------------------------------------------------------------------------------------------------------------------------------------------------------------------------------------------------------------------------------------------------------------------------------------------------------------------------------------------------------------------------------------------------------------------------------------------------------------------------------------------------------------------------------------------------------------------------------------|
| Journal:                        | <i>BMJ Open</i>                                                                                                                                                                                                                                                                                                                                                                                                                                                                                                                                                                                                                                                                              |
| Manuscript ID                   | bmjopen-2020-044977.R2                                                                                                                                                                                                                                                                                                                                                                                                                                                                                                                                                                                                                                                                       |
| Article Type:                   | Protocol                                                                                                                                                                                                                                                                                                                                                                                                                                                                                                                                                                                                                                                                                     |
| Date Submitted by the Author:   | 29-Apr-2021                                                                                                                                                                                                                                                                                                                                                                                                                                                                                                                                                                                                                                                                                  |
| Complete List of Authors:       | Wilson, Chloe; The University of Sydney Brain and Mind Centre<br>Nichles, Alissa; The University of Sydney Brain and Mind Centre, Brain and Mind Centre<br>Zmicerevska, Natalia; The University of Sydney Brain and Mind Centre<br>Carpenter, Joanne; The University of Sydney Brain and Mind Centre<br>Song, Yun; The University of Sydney, Brain and Mind Centre<br>McHugh, Catherine; The University of Sydney,<br>Hamilton, Blake; The University of Sydney, Brain and Mind Centre<br>Hockey, Samuel; The University of Sydney Brain and Mind Centre<br>Scott, Elizabeth; The University of Sydney Brain and Mind Centre<br>Hickie, Ian; The University of Sydney, Brain and Mind Centre |
| <b>Primary Subject Heading</b>: | Mental health                                                                                                                                                                                                                                                                                                                                                                                                                                                                                                                                                                                                                                                                                |
| Secondary Subject Heading:      | Mental health                                                                                                                                                                                                                                                                                                                                                                                                                                                                                                                                                                                                                                                                                |
| Keywords:                       | MENTAL HEALTH, Child & adolescent psychiatry < PSYCHIATRY, Depression & mood disorders < PSYCHIATRY, Schizophrenia & psychotic disorders < PSYCHIATRY                                                                                                                                                                                                                                                                                                                                                                                                                                                                                                                                        |
|                                 |                                                                                                                                                                                                                                                                                                                                                                                                                                                                                                                                                                                                                                                                                              |

SCHOLARONE™  
Manuscripts



I, the Submitting Author has the right to grant and does grant on behalf of all authors of the Work (as defined in the below author licence), an exclusive licence and/or a non-exclusive licence for contributions from authors who are: i) UK Crown employees; ii) where BMJ has agreed a CC-BY licence shall apply, and/or iii) in accordance with the terms applicable for US Federal Government officers or employees acting as part of their official duties; on a worldwide, perpetual, irrevocable, royalty-free basis to BMJ Publishing Group Ltd ("BMJ") its licensees and where the relevant Journal is co-owned by BMJ to the co-owners of the Journal, to publish the Work in this journal and any other BMJ products and to exploit all rights, as set out in our [licence](#).

The Submitting Author accepts and understands that any supply made under these terms is made by BMJ to the Submitting Author unless you are acting as an employee on behalf of your employer or a postgraduate student of an affiliated institution which is paying any applicable article publishing charge ("APC") for Open Access articles. Where the Submitting Author wishes to make the Work available on an Open Access basis (and intends to pay the relevant APC), the terms of reuse of such Open Access shall be governed by a Creative Commons licence – details of these licences and which [Creative Commons](#) licence will apply to this Work are set out in our licence referred to above.

Other than as permitted in any relevant BMJ Author's Self Archiving Policies, I confirm this Work has not been accepted for publication elsewhere, is not being considered for publication elsewhere and does not duplicate material already published. I confirm all authors consent to publication of this Work and authorise the granting of this licence.

1  
2  
3 **Title:** The effect of an online healthy lifestyle psychoeducation program to improve  
4 cardiometabolic outcomes and affective symptoms in youth receiving mental health  
5 care: study protocol for a pilot clinical trial.  
6  
7  
8  
9

10  
11  
12  
13  
14 **Authors:** Chloe Wilson, Alissa Nichles, Natalia Zmicerevska, Joanne Carpenter, Yun  
15 Song, Catherine McHugh, Blake Hamilton, Samuel Hockey, Elizabeth Scott, Ian B.  
16  
17  
18  
19  
20  
21  
22  
23  
24  
25  
26  
27  
28  
29  
30  
31  
32  
33  
34  
35  
36  
37  
38  
39  
40  
41  
42  
43  
44  
45  
46  
47  
48  
49  
50  
51  
52  
53  
54  
55  
56  
57  
58  
59  
60  
Hickie.

Youth Mental Health and Technology Team, Brain and Mind Centre, University of  
Sydney, Sydney, NSW, Australia.

\*Corresponding author: Chloe Wilson ([chloe.wilson@sydney.edu.au](mailto:chloe.wilson@sydney.edu.au))

Word Count: 4476 (without Abstract and References)

## Abstract

### Introduction

Worsened cardiometabolic profiles in youth with mental ill-health have been associated with a number of modifiable lifestyle risk factors. It is becoming increasingly evident that clinical interventions need to be multi-modal in focus to improve not only mental health symptoms, but also the physical health symptoms in this already at-risk cohort.

### Methods and Analysis:

This 12-week pilot clinical trial examines the efficacy, feasibility and acceptability of an adjunctive online psychoeducation program for improving cardiometabolic risk parameters and affective symptoms in a transdiagnostic sample of at least 44 young people aged 16-25 presenting for mental health care for mood and/or psychotic syndromes (including anxiety, depression, bipolar disorder and psychosis). Individuals will be invited to participate in a pilot clinical trial for a structured online psychoeducation program incorporating nutritional, physical activity, sleep-wake and healthy lifestyle information, delivered fortnightly over six online modules. Participants will undergo a series of assessments including: (1) self-report and clinician administered assessments determining mental health symptomatology; (2) blood tests to assess cardiometabolic markers (fasting insulin, fasting glucose, blood lipids); (3) anthropometric assessments (height, weight, waist circumference and blood pressure); and (4) sleep-wake behaviours and circadian rhythm assessments. Changes in scores for all cardiometabolic and affective measures will be assessed via paired samples t-tests, and correlations between change scores will be assessed via Pearson's or Spearman's correlations. Feasibility will be assessed via completion

1  
2  
3 rates and the acceptability of the program will be assessed via program satisfaction  
4  
5 measures.  
6  
7  
8  
9

### 10 **Ethics and Dissemination**

11  
12 This pilot clinical trial has been approved by the Sydney Local Health District  
13  
14 Research Ethics and Governance Office (X20-0228 & 2020/ETH01201). The results  
15  
16 of this pilot clinical trial will be disseminated into the scientific and broader  
17  
18 community through peer-reviewed journals, conference presentations, social media  
19  
20 and university websites.  
21  
22  
23  
24  
25

### 26 **Trial Registration**

27  
28 Australian New Zealand Clinical Trials Registry (ANZCTR) Number:  
29  
30 ACTRN12620000772943, Date 28 August, 2020.  
31  
32  
33  
34

### 35 **Keywords:**

36  
37 Youth mental ill-health, psychoeducation, cardiometabolic improvement, physical  
38  
39 activity, sleep-wake cycle regulation.  
40  
41  
42  
43  
44  
45  
46  
47  
48  
49  
50  
51  
52  
53  
54  
55  
56  
57  
58  
59  
60

## Strengths and Limitations of this Study

- This pilot clinical trial evaluates a multidisciplinary online psychoeducation program (involving structured nutrition, physical activity, sleep-wake and healthy lifestyle information) for improving cardiometabolic risk parameters and affective symptoms, in a transdiagnostic group of young people receiving mental health care.
- A range of cardiometabolic, anthropometric, sleep-wake and mental health symptoms are assessed throughout the trial to determine whether these factors influence each other.
- Online delivery of psychoeducation modules will allow participants to access the information remotely.
- As this is a single-arm study, it cannot determine the efficacy of the intervention compared to other behavioural interventions in the same cohort.
- This pilot clinical trial will provide important information about how multidisciplinary behavioural modification programs may help to manage the immediate cardiometabolic and affective symptoms of young people receiving mental health care, however cannot draw conclusions about the long-term effects of these lifestyle changes.

## Background

Premature mortality in those with severe mental illness has been well documented<sup>1-6</sup>, with diabetes and premature cardiovascular disease comprising some of the leading causes of premature mortality and morbidity in this cohort. Increased body mass index (BMI) and weight gain have been identified as key modifiable risk factors causing premature mortality and morbidity in young people with severe mental illness, along

1  
2  
3 with poor sleep-wake cycle regulation <sup>7-9</sup>, physical inactivity <sup>10-16</sup>, poor dietary habits <sup>10</sup>  
4  
5 <sup>17-20</sup> and smoking <sup>21-26</sup>.  
6  
7  
8  
9

10 Whilst many mental disorders can be managed with psychotherapy alone,  
11  
12 psychotropic medications including antipsychotics, antidepressants and mood  
13  
14 stabilisers are sometimes used for the treatment of a number of psychotic, affective  
15  
16 and behavioural disorders in youth <sup>27 28</sup>. Adolescents initiating psychotropic  
17  
18 medications may display heterogeneous side effects with some very complex long-  
19  
20 term cardiometabolic side effects <sup>29-32</sup>. Of particular concern, is the weight-gain  
21  
22 associated with second-generation antipsychotic (SGA) usage <sup>29 33-37</sup> which is acute  
23  
24 and can often be observed within 12 weeks of medication initiation <sup>38-43</sup>. Children and  
25  
26 adolescents appear to be at a greater risk of psychotropic-induced weight gain than  
27  
28 adults <sup>44 45</sup> and the younger the age of the child, the higher the mitigating risk <sup>37</sup>.  
29  
30 Psychotropic medication induced weight gain is a noteworthy adverse drug reaction  
31  
32 as it mediates the development of other more severe cardiometabolic outcomes <sup>38-43</sup>.  
33  
34  
35  
36  
37  
38  
39

40 Lifestyle interventions can be an effective alternative to pharmacological interventions  
41  
42 to manage the physical and mental health symptoms of people presenting with  
43  
44 psychiatric disorders <sup>46</sup>. The World Health Organisation guidelines recommend  
45  
46 lifestyle behavioural interventions as a first-line treatment for physical health  
47  
48 symptoms, including the cardiometabolic health, of adults with severe mental illness  
49  
50 <sup>47</sup>. The benefits of lifestyle and behavioural interventions for weight loss in obese  
51  
52 individuals and for the prevention of Type II Diabetes Mellitus (T2DM) are well-  
53  
54 established <sup>48 49</sup>. Additionally, psychoeducation interventions focusing on healthy  
55  
56 lifestyle habits including nutrition, physical activity and sleep-wake practices have  
57  
58  
59  
60



1  
2  
3 been shown to ameliorate both the physical and mental health concerns of young  
4 people with psychiatric disorders <sup>50-54</sup>.  
5  
6  
7  
8  
9

10 Face-to-face psychoeducation interventions for adults with severe mental illness are  
11 able to demonstrate significant improvements in weight <sup>55</sup>; depressive symptoms,  
12 sleep quality and nutrition <sup>56</sup>; and other cardiometabolic risk factors <sup>57</sup>. Existing web-  
13 based psychoeducation intervention studies on adults with mental illness have  
14 demonstrated improvements in depression and anxiety symptoms <sup>58</sup>, with mixed  
15 evidence on the effect of psychotic symptoms <sup>56 59</sup>. Other web-based psychoeducation  
16 studies on adults with mental illness have found increases in objective physical  
17 activity levels <sup>60</sup>, however have not measured cardiometabolic risk factors objectively.  
18 In youth, the literature in this field is more limited, with existing or planned studies in  
19 youth cohorts measuring affective symptom improvements only <sup>61-63</sup>. Evidence on the  
20 effect of healthy lifestyle psychoeducation programs on psychotic symptoms in youth  
21 is non-existent to our knowledge.  
22  
23  
24  
25  
26  
27  
28  
29  
30  
31  
32  
33  
34  
35  
36  
37  
38  
39

40 We are seeking to investigate the efficacy, feasibility and acceptability of a pilot clinical  
41 trial implementing an online healthy lifestyle psychoeducation program targeted  
42 towards improving objective cardiometabolic outcomes and affective symptoms in  
43 young people presenting for mental health care for mood or psychotic syndromes  
44 (including anxiety, depression, bipolar disorder and/or psychosis). Web-based  
45 interventions provide an alternative to traditional face-to-face interventions. The need  
46 for online programs is especially evident with the COVID-19 global pandemic impeding  
47 on young people's ability to seek face-to-face support. This has given rise to a need  
48 to develop more comprehensive resources tailored to the specific risk-factors of this  
49  
50  
51  
52  
53  
54  
55  
56  
57  
58  
59  
60

1  
2  
3 cohort in an easily accessible online format. Where effective, it would allow the  
4  
5 program to be implemented remotely, to many individuals who may not be able to  
6  
7 access in-person services.  
8  
9

## 10 11 12 **Methods and Analysis**

### 13 14 **Patient and Public Involvement**

15  
16 The study design, conduct and psychoeducation module content was developed in  
17  
18 consultation with a representative from the Brain and Mind Centre Youth Lived  
19  
20 Experienced Working Group. Patients or the public were not involved in the  
21  
22 reporting, or dissemination plans of our research.  
23  
24  
25  
26  
27

### 28 29 **Design and Structure**

30  
31 This is a one-arm longitudinal pilot clinical trial. The duration of the pilot clinical trial is  
32  
33 12 weeks. All participants will engage in an online 12-week psychoeducation program.  
34  
35 This psychoeducation program will involve structured nutritional, physical activity,  
36  
37 sleep-wake and general healthy lifestyle information based on the Australian  
38  
39 Guidelines of Physical Activity, the Australian Guide to Healthy Eating, and published  
40  
41 circadian research findings specific to youth mental illness<sup>64-67</sup>. This information will  
42  
43 be delivered for approximately 1 hour each fortnight over 6 online modules (week 1,  
44  
45 3, 5, 7, 9, and 11). The modules and study design have been developed in conjunction  
46  
47 with mental health experts and those with a lived experience of mental ill health,  
48  
49 specifically by presenting module material to a lived experience researcher and  
50  
51 tailoring module content and delivery modes to ensure the suitability and relevance for  
52  
53 this cohort. These modules are intensive and information dense, and by delivering  
54  
55 these modules every two weeks it allows the participants enough time to absorb the  
56  
57  
58  
59  
60

information and implement the advice into their lifestyle without becoming overwhelming.

Participants will be provided a link to access the online psychoeducation modules in their own time, or given the opportunity to attend a live online or face-to-face module session. These modules will cover the topics shown in Table 1.

**Table 1.** Psychoeducation modules

| Session                                                                  | Topics to be covered                                                                                                                                                                                                                                                                                 |
|--------------------------------------------------------------------------|------------------------------------------------------------------------------------------------------------------------------------------------------------------------------------------------------------------------------------------------------------------------------------------------------|
| 1. Body Clock and Sleep-Wake Cycle Regulation for mental health (part 1) | <ul style="list-style-type: none"> <li>- How the brain and body are connected</li> <li>- Establishing a healthy mindset</li> <li>- Importance of the brain and body clock and sleep-wake cycle regulation</li> <li>- How the brain and body clock coordinates all the biological systems</li> </ul>  |
| 2. Body Clock and Sleep-Wake Cycle Regulation for mental health (part 2) | <ul style="list-style-type: none"> <li>- Healthy sleep-wake behaviours</li> <li>- How lifestyle factors and behaviours influence the brain and body clock e.g. exercise, light exposure, sleep environment, sleep regularisation, naps, foods, stress, anxiety, mood.</li> </ul>                     |
| 3. Physical activity for mental health (part 1)                          | <ul style="list-style-type: none"> <li>- Benefits of physical activity for physical and mental health</li> <li>- Outline of Australian Physical Activity Guidelines</li> <li>- Barriers to engaging in physical activity</li> <li>- Increasing incidental activity, reducing sitting time</li> </ul> |
| 4. Physical activity for mental health (part 2)                          | <ul style="list-style-type: none"> <li>- Working out anywhere</li> <li>- Finding the motivation</li> <li>- Concept of energy in vs energy out</li> </ul>                                                                                                                                             |
| 5. Nutrition for mental health (part 1)                                  | <ul style="list-style-type: none"> <li>- Energy in vs energy out and introducing the concept of a calorie</li> <li>- Outline of Australian Dietary Guidelines</li> <li>- Standard serving sizes/portion sizes</li> </ul>                                                                             |
| 6. Nutrition for mental health (part 2)                                  | <ul style="list-style-type: none"> <li>- Timing of meals</li> <li>- Snacking</li> <li>- Meal preparation</li> <li>- Making healthy choices when eating out at restaurants</li> <li>- Managing comfort eating.</li> </ul>                                                                             |

Every week, participants will receive a monitoring phone call to aid the participant's engagement and ongoing participation. This monitoring phone call will provide the participants with the opportunity to discuss the module content with the research staff, as well as discussing their goals and how the module content can be implemented into their lifestyle. At the completion of all 6 modules the participant will be asked to provide feedback about the program and to share their overall satisfaction with the program

1  
2  
3 via a series of online questionnaires. These questionnaires will provide important  
4 information about the acceptability and feasibility of the psychoeducation program in  
5 this cohort.  
6  
7  
8  
9

10  
11  
12 Participants will be asked to wear an actigraph (GENEActiv; Activinsights, Kimbolton,  
13 UK) on the non-dominant wrist to collect 24-hour sleep-wake and physical activity  
14 parameters during weeks 1-2, 6-7 and 11-12. Fasting blood tests to measure  
15 metabolic markers; anthropometric assessments (blood pressure, height, weight and  
16 waist circumference); self-report and clinician administered assessments to assess  
17 various mental illness symptoms and physical activity engagement will be conducted  
18 in weeks 1 and 12. All assessments including the self-report questionnaires and  
19 clinician rated assessments are expected to take approximately two hours at each  
20 time point.  
21  
22  
23  
24  
25  
26  
27  
28  
29  
30  
31  
32  
33  
34

35 Most of these self-report and clinician administered assessments are part of the  
36 standardised assessment battery developed for the Youth Mental Health Tracker as  
37 part of the Brain and Mind Centre (BMC) multidimensional research framework<sup>68</sup>. The  
38 multidimensional outcome framework was developed to assess a comprehensive  
39 range of measures in individuals presenting to care across a range of domains  
40 important to mental health outcomes. All observational and interventional youth mental  
41 health research at the BMC uses a standardised set of measures within this  
42 framework. These assessments are part of an ongoing larger study for all young  
43 people presenting for mental health care to improve the outcomes of their clinical care.  
44  
45  
46  
47  
48  
49  
50  
51  
52  
53  
54  
55  
56 Other clinician administered measures have been included in this study as they are  
57  
58  
59  
60

improved and updated measures of self-report measures which are subject to bias and reporting errors.

The schedule of enrolment, interventions and assessment time points can be seen in Table 2.

**Table 2.** Schedule of enrolment, interventions and assessment time points.

| Study Procedures                             | Study Week |   |   |   |   |   |   |   |   |    |    |    |
|----------------------------------------------|------------|---|---|---|---|---|---|---|---|----|----|----|
|                                              | 1          | 2 | 3 | 4 | 5 | 6 | 7 | 8 | 9 | 10 | 11 | 12 |
| <b>Informed Consent</b>                      | X          |   |   |   |   |   |   |   |   |    |    |    |
| <b>Enrolment</b>                             | X          |   |   |   |   |   |   |   |   |    |    |    |
| <b>Psychoeducation Session</b>               | X          |   | X |   | X |   | X |   | X |    | X  |    |
| <b>Actigraphy</b>                            |            | X |   |   |   | X |   |   |   |    | X  |    |
| <b>Self-Report Questionnaires</b>            | X          |   |   |   |   |   |   |   |   |    |    | X  |
| <b>Clinician Administered Questionnaires</b> | X          |   |   |   |   |   |   |   |   |    |    | X  |
| <b>Blood Collection</b>                      | X          |   |   |   |   |   |   |   |   |    |    | X  |
| <b>Anthropometrics</b>                       | X          |   |   |   |   |   |   |   |   |    |    | X  |

### Setting, Recruitment and Informed Consent

This is a single-site, transdiagnostic intervention study, conducted at the BMC (including *headspace* Camperdown, and Early Intervention and High Intensity Services) at the University of Sydney (Sydney, Australia).

Potential participants will be identified as young people aged between 16 and 25 years of age presenting for mental health care, who are at risk for poor cardiometabolic outcomes due to being overweight or obese. To avoid recruitment bias, all treating

1  
2  
3 clinicians will be made aware of the study and eligibility criteria and will encourage all  
4  
5 suitable young people presenting for care at these services to participate in the study.  
6  
7

8 With the young person's permission, the clinicians will pass on the contact details to  
9  
10 the study research team, who will make further contact and initiate the informed  
11  
12 consent process. The research team will make explicit to any potential participants  
13  
14 both verbally and in writing (in the participant information and consent form) that  
15  
16 participation is voluntary. The study staff will then obtain written informed consent  
17  
18 from the young person to participate in the psychoeducation program. Each  
19  
20 participant will have a participant ID that links the participant to the research  
21  
22 database in a confidential and de-identified manner for the purpose of research.  
23  
24 Participants are free to withdraw from the study at any time by contacting research  
25  
26 staff. They will be assured that their decision whether to participate will not affect their  
27  
28 current or future relationship with the researchers or anyone else at The University of  
29  
30 Sydney nor their current or future involvement with the mental health service. If  
31  
32 participants withdraw from the study, all future data (i.e., from thereon) will not be  
33  
34 stored or used for research purposes.  
35  
36  
37  
38  
39  
40

### 41 **Selection Criteria**

42  
43 Young people will be invited into the trial based on the following inclusion criteria: (i)  
44  
45 aged between 16 and 25; (ii) receiving mental health care treatment at the participating  
46  
47 sites; (iii) body mass index (BMI)  $\geq 25$ ; (iv) willing and able to give independent written  
48  
49 informed consent to participate in the study.  
50  
51

52 The exclusion criteria are: (i) intellectual disability (at the discretion of a clinical  
53  
54 psychologist or psychiatrist); (ii) major neurological disorder, medical illness which  
55  
56 impacts on cognition, and/or a history of sustained head injury; (iv) not fluent in  
57  
58  
59  
60

English; or (v) an acute psychotic or manic episode that impairs the individual's ability to give informed consent and/or requires acute clinical treatment.

## Study Objectives

**Primary** To assess the efficacy of an online 12-week healthy lifestyle psychoeducation program in improving cardiometabolic parameters (fasting insulin, fasting glucose, the updated homeostatic model assessment (HOMA2 IR), cholesterol, triglycerides, blood pressure, BMI and waist circumference) of young people seeking treatment for mental health related issues.

**Secondary** To assess the efficacy of an online 12-week healthy lifestyle psychoeducation program in improving affective (depressive and anxiety) symptoms of young people seeking treatment for mental health related issues.

**Tertiary** To assess if changes in cardiometabolic health risk factors (fasting insulin, fasting glucose, triglycerides, HOMA2-IR, cholesterol, blood pressure, BMI and waist circumference) are associated with changes in affective (depressive and anxiety) symptom severity.

To assess the feasibility and acceptability of the psychoeducation program in a cohort of young people seeking treatment for mental health related issues.

## Measures

Key outcome measures targeted for this study are highlighted in **bold type**.

### Clinician Rated Assessments

- i. ***Diagnostic Assessment:*** The presence of any DSM-V Disorders will be assessed using the Structured Clinical Interview for DSM-V Disorders (SCID)<sup>69</sup>.

- 1  
2  
3  
4  
5  
6  
7  
8  
9  
10  
11  
12  
13  
14  
15  
16  
17  
18  
19  
20  
21  
22  
23  
24  
25  
26  
27  
28  
29  
30  
31  
32  
33  
34  
35  
36  
37  
38  
39  
40  
41  
42  
43  
44  
45  
46  
47  
48  
49  
50  
51  
52  
53  
54  
55  
56  
57  
58  
59  
60
- ii. Physical Health, Mental Health, Family Health and Treatment History:  
Current and past health history will be assessed and recorded by trained researchers and study doctors. This includes current medication and any changes in physical and/or mental health treatment being received throughout the trial.
  - iii. The Brief Psychiatric Rating Scale (BPRS) <sup>70</sup>: The BPRS measures psychiatric symptoms including depression, anxiety, hallucinations, delusions and unusual behaviour. This 24-item scale is one of the most universally used scales to measure psychotic symptoms <sup>71</sup>.
  - iv. Clinical Staging <sup>72</sup>: This framework stages individuals according to the presentation of their mental illness from those in the earliest phases with non-specific clinical presentations (Stages 1a 'seeking help'), those at greater-risk with more specific, sub-threshold presentations (Stage 1b 'attenuated syndromes') and those who have already reached a threshold for a progressive or recurrent disorder meeting diagnostic criteria (Stage 2, 3, or 4) <sup>72-75</sup>.
  - v. Pathophysiological Mechanisms <sup>76</sup>: The pathophysiological model suggests three possible pathways of illness: (i) neuro-developmental impairments, (ii) circadian dysregulation, and (iii) heightened sensitivity (i.e., stress-reactivity) in the "fear" circuitry. Based on these pathways, three clinical phenotype labels will be assigned to the individual: (i) developmental-psychotic, (ii) mania-fatigue, or (iii) anxiety-depression subtypes.
  - vi. Clinical Global Impression (CGI <sup>77</sup>): The CGI provides an indication of the young person's ability to function in context of their history, psychosocial circumstances, symptoms, and behaviour. The CGI comprises two one-item



measures evaluating the severity of psychopathology from 1 to 7 (CGI-Severity, CGI-S) and the change from the initiation of treatment on a seven-point scale (CGI-Improvement, CGI-I).

- vii. **The Young Mania Rating Scale (YMRS)**<sup>78</sup>: The YMRS is an eleven-item questionnaire measuring manic episode severity derived from the young person's subjective report and clinical observations during the clinical interview.
- viii. **The Simple Physical Activity Questionnaire (SIMPAQ)**<sup>79</sup>: The SIMPAQ is a five-item clinical tool designed to assess the degree of physical activity in cohorts at high risk of sedentary behaviour. This measure has been used in over 23 countries and can be reliability and validly administered by clinicians<sup>80</sup>.
- ix. **Suicidal ideation and behaviour**: Acute suicidal behaviour will be assessed by item 7.3 of the Comprehensive Assessment of At-Risk Mental States (CAARMS)<sup>81</sup>. The CAARMS is a semi-structured assessment tool designed to identify those at ultra-high risk for psychosis. This assessment is only to be administered as a safety measure where the self-report Suicidal Ideation Attributes Scale (SIDAS) score reaches the cut off score of  $\geq 21$  indicating a high risk of suicidal behaviour.
- x. **Social and Occupational Assessment Scale (SOFAS) (38)**: The SOFAS is a global rating of the participant's current social and occupational functioning, independent of the overall severity of the individual's psychological symptoms, ranging from 0 to 100, with lower scores indicating poorer functioning. The SOFAS has been used extensively in clinical

1  
2  
3 research and practice and has good construct validity, interrater reliability,  
4 and predictive validity<sup>82 83</sup>.  
5  
6  
7  
8  
9

### 10 **Self-Report Questionnaires:**

- 11  
12 i. **Demographics:** This questionnaire will comprise details on basic  
13 demographics (including details of work and education, ethnicity, living  
14 circumstances, relationship status), and physical health (height, weight and  
15 waist circumference).  
16  
17 ii. **Kessler Psychological Distress Scale (K-10)**<sup>84 85</sup>: The K-10 is a 10-item  
18 version of the Kessler scale that provides a global measure of distress  
19 derived from anxiety and depressive symptoms over a four-week period. It  
20 has high predictive validity and reliability<sup>86</sup>.  
21  
22 iii. **International Physical Activity Questionnaire (IPAQ) - short version**<sup>87</sup>  
23  
24 **88:** The short version of the International Physical Activity Questionnaires  
25 (IPAQ) is a seven-item questionnaire calculating the amount of time spent  
26 engaging in sedentary activity; mild, moderate, or vigorous-intensity  
27 physical activity. The original IPAQ has been tested across populations and  
28 broad age groups and demonstrates good reliability and validity<sup>87</sup>.  
29  
30 iv. **Somatic and Psychological Health Report (SPHERE 12)**<sup>89</sup>: The  
31 SPHERE 12 is a 12-item self-report questionnaire that assesses six  
32 psychological (PSYCH subscale), and six physical and fatigue symptoms  
33 (SOMA subscale) to identify anxiety, depression, and somatisation  
34 symptoms in primary care. The SPHERE-12 has been demonstrated to  
35 have high reliability and validity in populations over the age of 16<sup>89</sup>.  
36  
37  
38  
39  
40  
41  
42  
43  
44  
45  
46  
47  
48  
49  
50  
51  
52  
53  
54  
55  
56  
57  
58  
59  
60

- 1  
2  
3  
4  
5  
6  
7  
8  
9  
10  
11  
12  
13  
14  
15  
16  
17  
18  
19  
20  
21  
22  
23  
24  
25  
26  
27  
28  
29  
30  
31  
32  
33  
34  
35  
36  
37  
38  
39  
40  
41  
42  
43  
44  
45  
46  
47  
48  
49  
50  
51  
52  
53  
54  
55  
56  
57  
58  
59  
60
- v. **Sleep-wake cycle and chronotype:** Six questions will be asked concerning time falling asleep, time waking up during weekdays and weekends, hours of sleep and feelings when waking up. Sleep timing items are based on the Pittsburgh Sleep Quality Index (PSQI)<sup>90</sup>, and Munich Chrono Type Questionnaire (MCTQ)<sup>91</sup>, while sleep quality items were developed based on expert agreement in existing literature.
- vi. **Pittsburgh Sleep Quality Index (PSQI)<sup>90</sup>:** The PSQI is a 24-item self-report questionnaire measuring the quality and patterns of sleep. Seven domains are assessed including subjective sleep quality, sleep latency, sleep duration, habitual sleep efficiency, sleep disturbances, use of sleeping medications, and daytime dysfunction over the last month. This scale has good internal consistency and construct validity<sup>92 93</sup>.
- vii. **The Insomnia Severity Index (ISI)<sup>94</sup>:** This seven-item questionnaire assesses the severity of difficulties in initiating sleep, staying asleep, early morning awakenings, satisfaction with current sleep pattern, daily functioning and impairment attributed to the sleep problem, and the degree of distress or concern caused by the sleep problem. This scale has been used widely in clinical research with high internal consistency and convergent validity<sup>95</sup>.
- viii. **Suicidal Ideation Attributes Scale (SIDAS)<sup>96</sup>:** The SIDAS is a five-item self-report questionnaire assessing suicidal ideology in relation to the frequency, controllability, closeness to attempt, distress, and interference with daily activities over the last month. The SIDAS has demonstrated high internal consistency and good convergent validity<sup>97</sup>.

- 1  
2  
3  
4  
5  
6  
7  
8  
9  
10  
11  
12  
13  
14  
15  
16  
17  
18  
19  
20  
21  
22  
23  
24  
25  
26  
27  
28  
29  
30  
31  
32  
33  
34  
35  
36  
37  
38  
39  
40  
41  
42  
43  
44  
45  
46  
47  
48  
49  
50  
51  
52  
53  
54  
55  
56  
57  
58  
59  
60
- ix. **Quick Inventory of Depressive Symptomatology – self-report (QIDS-SR)** <sup>98</sup>: The QIDS is a rating scale assessing nine criterion symptom domains (sleep, sad mood, appetite/weight, concentration/ decision making, self-view, thoughts of death or suicide, general interest, energy level, and restlessness/agitation) outlined by the DSM-IV to diagnose a major depressive episode. This scale has high internal consistency and good predictive and concurrent validity <sup>99</sup>.
- x. **Overall Anxiety Severity Impairment Scale (OASIS)** <sup>100</sup>: The OASIS is a five-item self-report measure used to assess the frequency and intensity of anxiety symptoms, including the functional impairment and behavioural avoidance commonly associated with any anxiety disorder or multiple anxiety disorders. This scale has excellent test-retest reliability, and convergent and discriminant validity <sup>101</sup>.
- xi. **World Health Organisation (WHO) Alcohol, Smoking and Substance Involvement Screening Test (WHO-ASSIST)** <sup>102 103</sup>: The ASSIST (version 3.1) is an eight-item questionnaire screening for use of tobacco products, alcohol, cannabis, cocaine, amphetamine-type stimulants (ATS), sedatives and sleeping pills (benzodiazepines), hallucinogens, inhalants, opioids, 'other' drugs. This scale has demonstrated good validity <sup>104</sup> and reliability <sup>105</sup>.
- xii. **Alcohol Use Disorders Identification Test – Consumption (AUDIT-C)** <sup>106</sup>: The AUDIT-C is a three-item scale gauging alcohol consumption in a standardised manner. This scale has shown good reliability and validity in adolescent sample groups <sup>107</sup>.

- 1  
2  
3  
4  
5  
6  
7  
8  
9  
10  
11  
12  
13  
14  
15  
16  
17  
18  
19  
20  
21  
22  
23  
24  
25  
26  
27  
28  
29  
30  
31  
32  
33  
34  
35  
36  
37  
38  
39  
40  
41  
42  
43  
44  
45  
46
- xiii. **Eating Disorder Examination (EDE)** <sup>108 109</sup>: This self-report questionnaire assesses current eating disorder behaviours, including binge eating, purging and strict dieting or fasting. This self-report questionnaire has demonstrated good internal consistency and construct validity <sup>110</sup>.
- xiv. **Rosenberg Self-Esteem Scale (RSES)** <sup>111</sup>: The RSES is a 10-item self-report measure of self-esteem, self-worth or self-acceptance designed specifically for use in adolescent populations. Higher scores on this scale indicate higher levels of global self-esteem. This scale has extremely high internal consistency and demonstrated construct validity with other measures of self-esteem <sup>112 113</sup>.
- xv. **Client Satisfaction Questionnaire-8 (CSQ-8)** <sup>114</sup>: The CSQ assesses level of satisfaction with care and has been found to have high internal consistency and concurrent validity in mental health outpatient settings <sup>114</sup>.
- xvi. **Feedback Questionnaire**. This is an investigator-developed questionnaire specifically relating to the feasibility and acceptability of the psychoeducation program and whether the participants have any feedback or suggestions for improvement to the online psychoeducation program after completion of the program.

## 47 **Blood Markers**

48  
49  
50  
51  
52  
53  
54  
55  
56  
57  
58  
59  
60

Blood samples are to be collected in a fasting state between 8:00am and 10:00am by a trained phlebotomist at week 1 and week 12 to determine variables of interest including **fasting glucose; fasting insulin, and blood lipids (including triglycerides, total, high density lipoprotein (HDL) and low-density lipoprotein (LDL) cholesterol levels)**. Other blood measures to be collected for monitoring

1  
2  
3 purposes include **HbA1c**, full blood count, urea, electrolytes, liver function test, C-  
4 reactive protein (CRP), erythrocyte sedimentation rate (ESR), antinuclear antibodies  
5 (ANA), vitamin D, vitamin B12, folate, iron, thyroid stimulating hormone, calcium (Ca),  
6 magnesium (Mg) and phosphate (PO<sub>4</sub>) levels. **Insulin resistance** will be estimated  
7 using the updated homeostatic model assessment (**HOMA2-IR**) using iHOMA2  
8 software V.8.8<sup>115</sup> from fasting blood test results. Metabolic blood measures will be  
9 collected by a standard pathology request, and a de-identified copy of the results will  
10 be kept in the participants' file.  
11  
12  
13  
14  
15  
16  
17  
18  
19  
20  
21  
22

### 23 **Anthropometric Assessments**

24 Measures of **blood pressure, height and weight** will be collected via direct  
25 measurement by a clinician or research staff. **Body mass index (BMI)** will be  
26 calculated using the formula:  $\text{weight(kg)} \div \text{height(m)}^2$ . **Waist circumference** is  
27 measured with the participant standing up, to the nearest 1 cm with a measuring tape  
28 at the midpoint between the bottom of the rib cage and above the top of the iliac crest  
29 (hip bone) at the end of the participant's normal respiration. Where the young person  
30 is unable to visit the BMC for an anthropometric assessment, the participant will be  
31 required to self-report height and weight and will be instructed how to gather waist  
32 circumference measurements.  
33  
34  
35  
36  
37  
38  
39  
40  
41  
42  
43  
44  
45  
46  
47  
48  
49

### 50 **24-hour Sleep-Wake and Physical Activity Profiling**

51 All participants will wear wrist mounted actigraphy recording devices (GENEActiv  
52 Sleep device; Activinsights, Kimbolton, UK) to record motor activity over a two-week  
53 period for an estimation of sleep and physical activity patterns based on validated  
54 algorithms. Measurements include **sleep onset time, sleep offset time, sleep**  
55  
56  
57  
58  
59  
60

1  
2  
3 **midpoint**, sleep efficiency, wake after sleep onset (WASO: number of minutes during  
4 the sleep period scored as awake), and total sleep time (TST; number of minutes  
5 during the sleep period scored as sleep).  
6  
7  
8  
9

10 Physical activity levels will be assessed through the GENEActiv devices as gross  
11 motor activity per day (milli-gravity [mg], 1g = 9.81 m/s<sup>2</sup>) and **minutes of**  
12 **moderate-to-vigorous physical activity per day** (defined as the sum of 1-minute  
13 epochs in which gross motor activity is larger than 125 mg) as described in other  
14 studies <sup>116</sup>. The GENEActiv devices have been used widely in clinical research and  
15 validated against several types of accelerometry-based activity monitors <sup>117-120</sup> as well  
16 as for sleep-wake scoring <sup>121 122</sup>.  
17  
18  
19  
20  
21  
22  
23  
24  
25  
26  
27  
28

### 29 **Sample Size/ Power Calculation**

30 The proposed sample size calculation of at least 44 participants is based on specific  
31 power analysis parameters (power analyses completed in G\*Power Version 3.1.9.4),  
32 notably difference in means in HOMA2-IR scores of one sample with a power of 0.90,  
33 an effect size of 0.5, and an alpha level of 0.05. Whilst this is a pilot study, and a  
34 sample size has been estimated, this pilot data will be used to inform power  
35 calculations for future studies investigating similar outcome measures in this specific  
36 cohort.  
37  
38  
39  
40  
41  
42  
43  
44  
45  
46  
47  
48

### 49 **Data Analysis Plan**

50 All data will be entered into a secure password protected database and statistical  
51 analyses conducted in R statistical software. The primary and secondary objectives  
52 will be analysed by a change in mean scores of all outcome measures after completion  
53 of the 12-week online psychoeducation program via a paired samples t-test, with  
54  
55  
56  
57  
58  
59  
60

1  
2  
3 significance levels set at  $\alpha=.05$ . To assess the tertiary objectives, correlations will be  
4 performed between all cardiometabolic change scores and affective outcome change  
5 scores via Pearson's or Spearman's correlations tests based on normative or non-  
6 normative data distribution; with a significance level set at  $\alpha=.05$ . Overall completion  
7 rates of the study will be used to assess feasibility, and the average of the CSQ-8  
8 scores will be used to assess acceptability.  
9  
10  
11  
12  
13  
14  
15  
16  
17  
18

### 19 **Ethics and Dissemination**

20  
21 The Sydney Local Health District (RPAH Division) Human Ethics Research (HREC)  
22 Committee has approved this study (X20-0228). The online psychoeducation program  
23 is designed as an adjunct, not an alternative, to standard clinical treatments offered  
24 by the youth mental health services. As such, all participants are encouraged to  
25 continue to follow the healthcare advice of their treating clinicians and to remain in  
26 their care, as well as participating in the online psychoeducation sessions. This  
27 standard treatment may include medication, counselling, psychological therapy and/or  
28 referrals to a range of specialist mental health treatments or services.  
29  
30  
31  
32  
33  
34  
35  
36  
37  
38  
39  
40  
41

42 The headspace, Camperdown clinic is an established, specialised clinic for the youth  
43 mental health population. As such, the clinic has its own internal crisis management  
44 plans and are staffed with leading expertise in managing distress and unexpected  
45 occurrences for the youth mental population. As a further precaution, questions about  
46 suicidal ideation or self-harm will be asked in weeks 1, 4, 8, and 12 in the monitoring  
47 phone call. If there is an indication of suicidal intent, the CAARMS will be administered  
48 and suicidality standard operating protocol will be followed. Any adverse events will  
49 be logged into an Adverse Event Monitoring Log.  
50  
51  
52  
53  
54  
55  
56  
57  
58  
59  
60



1  
2  
3 In accordance with the guidelines stipulated by the funding bodies, the results of this  
4 study will be disseminated as widely as possible into the scientific and broader  
5 community. This may include publication in peer-reviewed journals, scholarly book  
6 chapters, presentation at conferences and publication in conference proceedings. In  
7 accordance with NHMRC policy, publications arising from this study will be deposited  
8 into an open access institutional repository, where possible. It is also intended for  
9 results to be disseminated into the wider community in a format appropriate for a lay  
10 audience, through links including the BMC website and social media, as well as  
11 newsletters.  
12  
13  
14  
15  
16  
17  
18  
19  
20  
21  
22  
23  
24  
25

## 26 **Discussion**

27  
28 This pilot clinical trial plans to evaluate the efficacy, feasibility and acceptability of a  
29 12-week online psychoeducation program (involving structured nutrition, physical  
30 activity, sleep-wake and healthy lifestyle information) on several cardiometabolic risk  
31 factors and affective symptoms in youth seeking treatment for mental ill-health. The  
32 multidimensional modules feature a youth-friendly format, with input from those with  
33 lived experience, to maximise engagement by young people. If the findings of this pilot  
34 clinical trial demonstrate benefits in each of the targeted domains, it will be used as a  
35 basis for further clinical trials incorporating more intensive psychoeducation combined  
36 with pharmacological therapies. Due to the online nature of the psychoeducation  
37 program, there is also potential for a larger-scale study to be implemented across a  
38 number of centres nationally, allowing individuals to access the program remotely and  
39 regionally.  
40  
41  
42  
43  
44  
45  
46  
47  
48  
49  
50  
51  
52  
53  
54  
55

56 Whilst this pilot study will provide important information about how multidisciplinary  
57 behavioural modification programs may help to manage the immediate  
58  
59  
60

1  
2  
3 cardiometabolic and mental health symptoms (including affective, anxiety and  
4 psychotic symptoms) of young people receiving mental health care, it cannot draw  
5 conclusions about the long-term implications of these lifestyle changes on the  
6 assessed domains. Additionally, as this is a single-arm pilot study, it cannot determine  
7 the efficacy of the intervention compared to other behavioural interventions in the  
8 same cohort. Future research should thus aim to monitor participants over longer  
9 periods of time whilst comparing to other pharmacological (for example metformin) or  
10 behavioural interventions.  
11  
12  
13  
14  
15  
16  
17  
18  
19  
20  
21  
22  
23

### 24 **Trial Status**

25  
26 The trial has begun recruitment.  
27  
28  
29

### 30 **Funding and Sponsor**

31  
32 This project is an investigator-initiated study, sponsored by the University of Sydney  
33 and supported by philanthropic funding, for which donor(s) are families affected by  
34 mental illness who wish to remain anonymous. This study was also partially funded by  
35 a philanthropic PhD scholarship (The Liu McCabe Family Scholarship awarded to  
36 C.W), a National Health & Medical Research Council Australia Fellowship (No.  
37 511921, awarded to I.B.H) and a philanthropic fellowship (the Caroline Quinn  
38 Research Grant awarded to J.C). The funders of this study had no involvement in the:  
39 study design; collection, analysis and reporting of the data; writing of the report; or  
40 decision to submit the paper for publication.  
41  
42  
43  
44  
45  
46  
47  
48  
49  
50  
51  
52  
53  
54  
55  
56  
57  
58  
59  
60

### Author's Contributions

C.E.W. has developed this pilot clinical trial as part of her PhD research project and drafted this original manuscript with input from other authors. I.B.H assisted with the design of the study. A.N., N.Z., J.S.C., Y.S., C.M., B.H., S.H. and E.S. were all involved with modifications to the design of the study and with drafting of this paper. All authors have read and approved the final manuscript.

### Competing Interests Statement

Professor Ian Hickie was an inaugural Commissioner on Australia's National Mental Health Commission (2012-18). He is the Co-Director, Health and Policy at the Brain and Mind Centre (BMC) University of Sydney. The BMC operates early-intervention youth services at Camperdown under contract to *headspace*. He is the Chief Scientific Advisor to, and a 5% equity shareholder in, InnoWell Pty Ltd. InnoWell was formed by the University of Sydney (45% equity) and PwC (Australia; 45% equity) to deliver the \$30M Australian Government-funded Project Synergy (2017-20; a three-year program for the transformation of mental health services) and to lead transformation of mental health services internationally through the use of innovative technologies.

A/Prof Elizabeth Scott is Principal Research Fellow at the Brain and Mind Centre, The University of Sydney. She is Discipline Leader of Adult Mental Health, School of Medicine, University of Notre Dame, and a Consultant Psychiatrist. She was the Medical Director, Young Adult Mental Health Unit, St Vincent's Hospital Darlinghurst until January 2021. She has received honoraria for educational seminars related to the clinical management of depressive disorders supported by Servier and Eli-Lilly pharmaceuticals. She has participated in a national advisory board for the

1  
2  
3 antidepressant compound Pristiq, manufactured by Pfizer. She was the National  
4  
5 Coordinator of an antidepressant trial sponsored by Servier.  
6  
7  
8  
9  
10  
11  
12  
13  
14  
15  
16  
17  
18  
19  
20  
21  
22  
23  
24  
25  
26  
27  
28  
29  
30  
31  
32  
33  
34  
35  
36  
37  
38  
39  
40  
41  
42  
43  
44  
45  
46  
47  
48  
49  
50  
51  
52  
53  
54  
55  
56  
57  
58  
59  
60

For peer review only

## References

1. Liu NH, Daumit GL, Dua T, et al. Excess mortality in persons with severe mental disorders: a multilevel intervention framework and priorities for clinical practice, policy and research agendas. *World psychiatry* 2017;16(1):30-40.
2. Chesney E, Goodwin GM, Fazel S. Risks of all-cause and suicide mortality in mental disorders: a meta-review. *World Psychiatry* 2014;13(2):153-60.
3. Laursen TM, Musliner KL, Benros ME, et al. Mortality and life expectancy in persons with severe unipolar depression. *Journal of affective disorders* 2016;193:203-07.
4. Cuijpers P, Vogelzangs N, Twisk J, et al. Comprehensive meta-analysis of excess mortality in depression in the general community versus patients with specific illnesses. *American journal of psychiatry* 2014;171(4):453-62.
5. Hayes J, Miles J, Walters K, et al. A systematic review and meta-analysis of premature mortality in bipolar affective disorder. *Acta Psychiatrica Scandinavica* 2015;131(6):417-25.
6. Roberts LW, Louie AK, Guerrero APS, et al. Premature Mortality Among People with Mental Illness: Advocacy in Academic Psychiatry. *Academic Psychiatry* 2017;41(4):441-46. doi: 10.1007/s40596-017-0738-9
7. Feliciano EMC, Quante M, Rifas-Shiman SL, et al. Objective sleep characteristics and cardiometabolic health in young adolescents. *Pediatrics* 2018;142(1):e20174085.
8. Quante M, Feliciano EMC, Rifas-Shiman SL, et al. Association of Daily Rest-Activity Patterns With Adiposity and Cardiometabolic Risk Measures in Teens. *Journal of Adolescent Health* 2019.
9. Grandner MA, Jackson NJ, Pak VM, et al. Sleep disturbance is associated with cardiovascular and metabolic disorders. *Journal of sleep research* 2012;21(4):427-33.
10. Ringen PA, Faerden A, Antonsen B, et al. Cardiometabolic risk factors, physical activity and psychiatric status in patients in long-term psychiatric inpatient departments. *Nordic journal of psychiatry* 2018;72(4):296-302.
11. Scheewe T, Jörg F, Takken T, et al. Low physical activity and Cardiorespiratory fitness in people with schizophrenia: a comparison with matched healthy controls and associations with mental and physical health. *Frontiers in psychiatry* 2019;10:87.
12. Vancampfort D, Stubbs B. Physical activity and metabolic disease among people with affective disorders: Prevention, management and implementation. *Journal of Affective Disorders* 2017;224:87-94. doi: <https://doi.org/10.1016/j.jad.2016.07.042>
13. Vancampfort D, Firth J, Schuch F, et al. Physical activity and sedentary behavior in people with bipolar disorder: a systematic review and meta-analysis. *Journal of affective disorders* 2016;201:145-52.
14. Vancampfort D, Firth J, Schuch FB, et al. Sedentary behavior and physical activity levels in people with schizophrenia, bipolar disorder and major depressive disorder: a global systematic review and meta-analysis. *World Psychiatry* 2017;16(3):308-15.
15. Schuch F, Vancampfort D, Firth J, et al. Physical activity and sedentary behavior in people with major depressive disorder: a systematic review and meta-analysis. *Journal of affective disorders* 2017;210:139-50.

16. Vancampfort D, Sienaert P, Wyckaert S, et al. Sitting time, physical fitness impairments and metabolic abnormalities in people with bipolar disorder: An exploratory study. *Psychiatry Research* 2016;242:7-12. doi: <https://doi.org/10.1016/j.psychres.2016.05.023>
17. Soreca I, Wallace M, Hall M, et al. The association between meal timing and frequency with cardiometabolic profile in patients with bipolar disorder. *Acta Psychiatrica Scandinavica* 2016;133(6):453-58.
18. Teasdale SB, Ward PB, Samaras K, et al. Dietary intake of people with severe mental illness: systematic review and meta-analysis. *The British Journal of Psychiatry* 2019;214(5):251-59.
19. Firth J, Stubbs B, Teasdale SB, et al. Diet as a hot topic in psychiatry: a population-scale study of nutritional intake and inflammatory potential in severe mental illness. *World Psychiatry* 2018;17(3):365.
20. Barker MK, Sable CM, Montgomery SE, et al. Diet and cardiometabolic side effects in children treated with second-generation antipsychotics. *Clinical nutrition ESPEN* 2018;23:205-11.
21. Mallet J, Le Strat Y, Schürhoff F, et al. Tobacco smoking is associated with antipsychotic medication, physical aggressiveness, and alcohol use disorder in schizophrenia: results from the FACE-SZ national cohort. *European archives of psychiatry and clinical neuroscience* 2019;269(4):449-57.
22. Jackson JG, Diaz FJ, Lopez L, et al. A combined analysis of worldwide studies demonstrates an association between bipolar disorder and tobacco smoking behaviors in adults. *Bipolar Disorders* 2015;17(6):575-97.
23. Richardson S, McNeill A, Brose LS. Smoking and quitting behaviours by mental health conditions in Great Britain (1993–2014). *Addictive behaviors* 2019;90:14-19.
24. Prochaska JJ, Das S, Young-Wolff KC. Smoking, mental illness, and public health. *Annual Review of Public Health* 2017;38:165-85.
25. Callaghan RC, Veldhuizen S, Jeysingh T, et al. Patterns of tobacco-related mortality among individuals diagnosed with schizophrenia, bipolar disorder, or depression. *Journal of psychiatric research* 2014;48(1):102-10.
26. Weinberger AH, Streck JM, Pacek LR, et al. Nondaily Cigarette Smoking Is Increasing Among People With Common Mental Health and Substance Use Problems in the United States:: Data From Representative Samples of US Adults, 2005–2014. *The Journal of clinical psychiatry* 2018;79(5)
27. Seida JC, Schouten JR, Boylan K, et al. Antipsychotics for children and young adults: a comparative effectiveness review. *Pediatrics* 2012;129(3):e771-e84.
28. Cheng-Shannon J, McGough JJ, Pataki C, et al. Second-generation antipsychotic medications in children and adolescents. *Journal of Child & Adolescent Psychopharmacology* 2004;14(3):372-94.
29. Pillay J, Boylan K, Carrey N, et al. First-and second-generation antipsychotics in children and young adults: systematic review update. 2017
30. Jerrell JM, McIntyre RS. Adverse events in children and adolescents treated with antipsychotic medications. *Human Psychopharmacology: Clinical and Experimental* 2008;23(4):283-90.
31. De Hert M, Yu W, Detraux J, et al. Body weight and metabolic adverse effects of aripiprazole, iloperidone, lurasidone and paliperidone in the treatment of schizophrenia and bipolar disorder. *CNS drugs* 2012;26(9):733-59.

- 1
  - 2
  - 3
  - 4
  - 5
  - 6
  - 7
  - 8
  - 9
  - 10
  - 11
  - 12
  - 13
  - 14
  - 15
  - 16
  - 17
  - 18
  - 19
  - 20
  - 21
  - 22
  - 23
  - 24
  - 25
  - 26
  - 27
  - 28
  - 29
  - 30
  - 31
  - 32
  - 33
  - 34
  - 35
  - 36
  - 37
  - 38
  - 39
  - 40
  - 41
  - 42
  - 43
  - 44
  - 45
  - 46
  - 47
  - 48
  - 49
  - 50
  - 51
  - 52
  - 53
  - 54
  - 55
  - 56
  - 57
  - 58
  - 59
  - 60
32. Ngai YF, Sabatini P, Nguyen D, et al. Quetiapine treatment in youth is associated with decreased insulin secretion. *Journal of clinical psychopharmacology* 2014;34(3):359-64.
33. Panagiotopoulos C, Ronsley R, Davidson J. Increased prevalence of obesity and glucose intolerance in youth treated with second-generation antipsychotic medications. *The Canadian Journal of Psychiatry* 2009;54(11):743-49.
34. Scott EM, Hermens DF, White D, et al. Body mass, cardiovascular risk and metabolic characteristics of young persons presenting for mental healthcare in Sydney, Australia. *BMJ open* 2015;5(3):e007066.
35. Fraguas D, Correll CU, Merchán-Naranjo J, et al. Efficacy and safety of second-generation antipsychotics in children and adolescents with psychotic and bipolar spectrum disorders: comprehensive review of prospective head-to-head and placebo-controlled comparisons. *European Neuropsychopharmacology* 2011;21(8):621-45.
36. Zuddas A, Zanni R, Usala T. Second generation antipsychotics (SGAs) for non-psychotic disorders in children and adolescents: a review of the randomized controlled studies. *European Neuropsychopharmacology* 2011;21(8):600-20.
37. Martínez-Ortega JM, Funes-Godoy S, Díaz-Atienza F, et al. Weight gain and increase of body mass index among children and adolescents treated with antipsychotics: a critical review. *European child & adolescent psychiatry* 2013;22(8):457-79.
38. Baeza I, Vigo L, de la Serna E, et al. The effects of antipsychotics on weight gain, weight-related hormones and homocysteine in children and adolescents: a 1-year follow-up study. *European child & adolescent psychiatry* 2017;26(1):35-46.
39. Stigler KA, Potenza MN, Posey DJ, et al. Weight gain associated with atypical antipsychotic use in children and adolescents. *Pediatric Drugs* 2004;6(1):33-44.
40. De Hert M, Dobbelaere M, Sheridan EM, et al. Metabolic and endocrine adverse effects of second-generation antipsychotics in children and adolescents: A systematic review of randomized, placebo controlled trials and guidelines for clinical practice. *European Psychiatry* 2011;26(3):144-58. doi: <https://doi.org/10.1016/j.eurpsy.2010.09.011>
41. Correll CU, Carlson HE. Endocrine and metabolic adverse effects of psychotropic medications in children and adolescents. *Journal of the American Academy of Child & Adolescent Psychiatry* 2006;45(7):771-91.
42. Maayan L, Correll CU. Weight gain and metabolic risks associated with antipsychotic medications in children and adolescents. *Journal of child and adolescent psychopharmacology* 2011;21(6):517-35.
43. Correll CU, Manu P, Olshanskiy V, et al. Cardiometabolic Risk of Second-Generation Antipsychotic Medications During First-Time Use in Children and Adolescents. *JAMA* 2009;302(16):1765-73. doi: 10.1001/jama.2009.1549
44. Arango C, Robles O, Parellada M, et al. Olanzapine compared to quetiapine in adolescents with a first psychotic episode. *European child & adolescent psychiatry* 2009;18(7):418.
45. Safer DJ. A comparison of risperidone-induced weight gain across the age span. *Journal of clinical psychopharmacology* 2004;24(4):429-36.
46. Briguglio M, Vitale JA, Galentino R, et al. Healthy eating, physical activity, and sleep hygiene (HEPAS) as the winning triad for sustaining physical and mental health in patients at risk for or with neuropsychiatric disorders:

- considerations for clinical practice. *Neuropsychiatric disease and treatment* 2020;16:55.
47. WHO. Management of physical health conditions in adults with severe mental disorders: WHO guidelines. 2018
  48. Gluth A, White D, Ward M. Lifestyle interventions in patients with serious mental illness. *Lifestyle in Heart Health and Disease: Elsevier* 2018:247-53.
  49. Parker AG, Bailey AP. Exercise for adolescents and young people with mental illness. *Exercise-Based Interventions for Mental Illness: Elsevier* 2018:149-67.
  50. De Rosa C, Sampogna G, Luciano M, et al. Improving physical health of patients with severe mental disorders: a critical review of lifestyle psychosocial interventions. *Expert review of neurotherapeutics* 2017;17(7):667-81.
  51. Rönngren Y, Björk A, Audulv Å, et al. Educational nurse-led lifestyle intervention for persons with mental illness. *International journal of mental health nursing* 2018;27(3):1022-31.
  52. Fiorillo A, Luciano M, Pompili M, et al. Reducing the Mortality Gap in People With Severe Mental Disorders: The Role of Lifestyle Psychosocial Interventions. *Frontiers in psychiatry* 2019;10
  53. Taylor CI, Tompsett C, Sanders R, et al. The effectiveness of structured exercise programmes on psychological and physiological outcomes for patients with psychotic disorders: A systematic review and meta-analysis. *International Journal of Sport and Exercise Psychology* 2018:1-26.
  54. Goracci A, Rucci P, Forgiione R, et al. Development, acceptability and efficacy of a standardized healthy lifestyle intervention in recurrent depression. *Journal of affective disorders* 2016;196:20-31.
  55. Murphy JA, Oliver G, Ng C, et al. Pilot-Testing of “Healthy Body Healthy Mind”: An Integrative Lifestyle Program for Patients With a Mental Illness and Co-morbid Metabolic Syndrome. *Frontiers in psychiatry* 2019;10:91.
  56. Bersani FS, Biondi M, Coviello M, et al. Psychoeducational intervention focused on healthy living improves psychopathological severity and lifestyle quality in psychiatric patients: preliminary findings from a controlled study. *Journal of Mental Health* 2017;26(3):271-75.
  57. Gurusamy J, Gandhi S, Damodharan D, et al. Exercise, diet and educational interventions for metabolic syndrome in persons with schizophrenia: a systematic review. *Asian Journal of Psychiatry* 2018;36:73-85.
  58. Rosenbaum S, Newby JM, Steel Z, et al. Online physical activity interventions for mental disorders: A systematic review. *Internet Interventions* 2015;2(2):214-20.
  59. Deenik J, Tenback DE, Tak EC, et al. Changes in physical and psychiatric health after a multidisciplinary lifestyle enhancing treatment for inpatients with severe mental illness: The MULTI study I. *Schizophrenia research* 2019;204:360-67.
  60. Lambert JD, Greaves CJ, Farrand P, et al. Web-based intervention using behavioral activation and physical activity for adults with depression (the eMotion study): pilot randomized controlled trial. *Journal of medical Internet research* 2018;20(7):e10112.
  61. Parker AG, Markulev C, Rickwood DJ, et al. Improving Mood with Physical ACTivity (IMPACT) trial: a cluster randomised controlled trial to determine the effectiveness of a brief physical activity behaviour change intervention on depressive symptoms in young people, compared with psychoeducation, in addition to routine clinical care within youth mental health services—a protocol study. *BMJ open* 2019;9(10)



- 1
  - 2
  - 3
  - 4
  - 5
  - 6
  - 7
  - 8
  - 9
  - 10
  - 11
  - 12
  - 13
  - 14
  - 15
  - 16
  - 17
  - 18
  - 19
  - 20
  - 21
  - 22
  - 23
  - 24
  - 25
  - 26
  - 27
  - 28
  - 29
  - 30
  - 31
  - 32
  - 33
  - 34
  - 35
  - 36
  - 37
  - 38
  - 39
  - 40
  - 41
  - 42
  - 43
  - 44
  - 45
  - 46
  - 47
  - 48
  - 49
  - 50
  - 51
  - 52
  - 53
  - 54
  - 55
  - 56
  - 57
  - 58
  - 59
  - 60
62. Nasstasia Y, Baker AL, Halpin SA, et al. Evaluating the efficacy of an integrated motivational interviewing and multi-modal exercise intervention for youth with major depression: Healthy Body, Healthy Mind randomised controlled trial protocol. *Contemporary clinical trials communications* 2018;9:13-22.
63. Parker AG, Hetrick SE, Jorm AF, et al. The effectiveness of simple psychological and physical activity interventions for high prevalence mental health problems in young people: a factorial randomised controlled trial. *Journal of affective disorders* 2016;196:200-09.
64. Robillard R, Hermens DF, Naismith SL, et al. Ambulatory sleep-wake patterns and variability in young people with emerging mental disorders. *Journal of Psychiatry & Neuroscience* 2014;In Press
65. Harvey AG, Mullin BC, Hinshaw SP. Sleep and circadian rhythms in children and adolescents with bipolar disorder. *Development and psychopathology* 2006;18(4):1147-68. doi: 10.1017/S095457940606055X
66. Cousins JC, Whalen DJ, Dahl RE, et al. The bidirectional association between daytime affect and nighttime sleep in youth with anxiety and depression. *Journal of pediatric psychology* 2011;36(9):969-79. doi: 10.1093/jpepsy/jsr036
67. Minassian A, Henry BL, Geyer MA, et al. The quantitative assessment of motor activity in mania and schizophrenia. *Journal of affective disorders* 2010;120(1-3):200-6. doi: 10.1016/j.jad.2009.04.018
68. Rohleder C, Song YJC, Crouse JJ, et al. Youth Mental Health Tracker: protocol to establish a longitudinal cohort and research database for young people attending Australian mental health services. *BMJ Open* 2020;10(6):e035379. doi: 10.1136/bmjopen-2019-035379
69. American Psychiatric Association. Diagnostic and statistical manual of mental disorders. 5th ed. Arlington, VA2013.
70. Overall JE, Gorham DR. The brief psychiatric rating scale. *Psychol Rep* 1962;10:799-812.
71. Bell M, Milstein R, Beam-Goulet J, et al. The Positive and Negative Syndrome Scale and the Brief Psychiatric Rating Scale: reliability, comparability, and predictive validity. *Journal of Nervous and Mental Disease* 1992
72. Hickie IB, Scott EM, Hermens DF, et al. Applying clinical staging to young people who present for mental health care. *Early Intervention in Psychiatry* 2013;7(1):31-43.
73. McGorry PD, Hickie IB, Yung AR, et al. Clinical staging of psychiatric disorders: a heuristic framework for choosing earlier, safer and more effective interventions. *The Australian and New Zealand journal of psychiatry* 2006;40(8):616-22. doi: 10.1080/j.1440-1614.2006.01860.x [published Online First: 2006/07/27]
74. Scott J, Leboyer M, Hickie I, et al. Clinical staging in psychiatry: a cross-cutting model of diagnosis with heuristic and practical value. *British Journal of Psychiatry* 2013;202(4):243-45. doi: 10.1192/bjp.bp.112.110858 [published Online First: 2018/01/02]
75. Hickie IB, Scott J, McGorry PD. Clinical staging for mental disorders: a new development in diagnostic practice in mental health. *Med J Aust* 2013;198(9):461-2. [published Online First: 2013/05/21]
76. Hickie IB, Hermens DF, Naismith SL, et al. Evaluating differential developmental trajectories to adolescent-onset mood and psychotic disorders. *BMC psychiatry* 2013;13:303. doi: 10.1186/1471-244x-13-303 [published Online First: 2013/11/13]

- 1
  - 2
  - 3
  - 4
  - 5
  - 6
  - 7
  - 8
  - 9
  - 10
  - 11
  - 12
  - 13
  - 14
  - 15
  - 16
  - 17
  - 18
  - 19
  - 20
  - 21
  - 22
  - 23
  - 24
  - 25
  - 26
  - 27
  - 28
  - 29
  - 30
  - 31
  - 32
  - 33
  - 34
  - 35
  - 36
  - 37
  - 38
  - 39
  - 40
  - 41
  - 42
  - 43
  - 44
  - 45
  - 46
  - 47
  - 48
  - 49
  - 50
  - 51
  - 52
  - 53
  - 54
  - 55
  - 56
  - 57
  - 58
  - 59
  - 60
77. Busner J, Targum SD. The Clinical Global Impressions Scale: Applying a Research Tool in Clinical Practice. *Psychiatry (Edgmont)* 2007;4(7):28-37.
78. Young R, Biggs J, Ziegler V, et al. A rating scale for mania: reliability, validity and sensitivity. *The British Journal of Psychiatry* 1978;133(5)
79. Rosenbaum S, Ward PB. The simple physical activity questionnaire. *The Lancet Psychiatry* 2016;3(1):e1.
80. Rosenbaum S, Morell R, Abdel-Baki A, et al. Assessing physical activity in people with mental illness: 23-country reliability and validity of the simple physical activity questionnaire (SIMPAQ). *Bmc Psychiatry* 2020;20(1):1-12.
81. Yung AR, Yuen HP, McGorry PD, et al. Mapping the onset of psychosis: the Comprehensive Assessment of At-Risk Mental States. *Aust N Z J Psychiatry* 2005;39:964-71.
82. Hilsenroth MJ, Ackerman SJ, Blagys MD, et al. Reliability and validity of DSM-IV axis V. *American Journal of Psychiatry* 2000;157(11):1858-63.
83. Hay P, Katsikitis M, Begg J, et al. A two-year follow-up study and prospective evaluation of the DSM-IV axis V. *Psychiatric Services* 2003;54(7):1028-30.
84. Kessler RC, Andrews G, Colpe LJ, et al. Short screening scales to monitor population prevalences and trends in non-specific psychological distress. *Psychol Med* 2002;32(6):959-76. [published Online First: 2002/09/07]
85. Andrews G, Slade T. Interpreting scores on the Kessler Psychological Distress Scale (K10). *Australian and New Zealand journal of public health* 2001;25(6):494-7. [published Online First: 2002/02/05]
86. Smout MF. The factor structure and predictive validity of the Kessler Psychological Distress Scale (K10) in children and adolescents. *Australian Psychologist* 2019;54(2):102-13.
87. Craig CL, Marshall AL, Sjoström M, et al. International physical activity questionnaire: 12-country reliability and validity. *Med Sci Sports Exerc* 2003;35(8):1381-95. doi: 10.1249/01.MSS.0000078924.61453.FB [published Online First: 2003/08/06]
88. Booth M. Assessment of physical activity: an international perspective. *Res Q Exerc Sport* 2000;71(2 Suppl):S114-20. [published Online First: 2000/08/05]
89. Berryman C, McAuley JH, Moseley LG. Sphere 12 screening questionnaire. *Journal of Physiotherapy* 2012;58(4):273.
90. Smyth C. The Pittsburgh sleep quality index (PSQI). *Journal of gerontological nursing* 1999;25(12):10-10.
91. Shahid A, Wilkinson K, Marcu S, et al. Munich Chronotype Questionnaire (MCTQ). *STOP, THAT and One Hundred Other Sleep Scales*: Springer 2011:245-47.
92. Raniti MB, Waloszek JM, Schwartz O, et al. Factor structure and psychometric properties of the Pittsburgh Sleep Quality Index in community-based adolescents. *Sleep* 2018;41(6):zsy066.
93. Carpenter JS, Andrykowski MA. Psychometric evaluation of the Pittsburgh sleep quality index. *Journal of psychosomatic research* 1998;45(1):5-13.
94. Morin CM. *Insomnia: psychological assessment and management*: Guilford press 1993.
95. Morin CM, Belleville G, Bélanger L, et al. The Insomnia Severity Index: psychometric indicators to detect insomnia cases and evaluate treatment response. *Sleep* 2011;34(5):601-08.
96. van Spijker BA, Batterham PJ, Calear AL, et al. The suicidal ideation attributes scale (SIDAS): Community-based validation study of a new scale for the

- 1  
2  
3 measurement of suicidal ideation. *Suicide & life-threatening behavior*  
4 2014;44(4):408-19. doi: 10.1111/sltb.12084 [published Online First:  
5 2014/03/13]  
6  
7 97. AJ B, Spijker P, BATTERHAM PJ, et al. The Suicidal Ideation Attributes Scale  
8 (SIDAS): Community-Based Validation Study of a New Scale for the  
9 Measurement of Suicidal Ideation. 2014  
10  
11 98. Rush AJ, Trivedi MH, Ibrahim HM, et al. The 16-Item Quick Inventory of  
12 Depressive Symptomatology (QIDS), clinician rating (QIDS-C), and self-report  
13 (QIDS-SR): a psychometric evaluation in patients with chronic major  
14 depression. *Biol Psychiatry* 2003;54(5):573-83. [published Online First:  
15 2003/08/30]  
16  
17 99. Rush AJ, Trivedi MH, Ibrahim HM, et al. The 16-Item Quick Inventory of  
18 Depressive Symptomatology (QIDS), clinician rating (QIDS-C), and self-report  
19 (QIDS-SR): a psychometric evaluation in patients with chronic major  
20 depression. *Biological psychiatry* 2003;54(5):573-83.  
21  
22 100. Norman SB, Cissell SH, Means-Christensen AJ, et al. Development and  
23 validation of an Overall Anxiety Severity And Impairment Scale (OASIS).  
24 *Depress Anxiety* 2006;23(4):245-9. doi: 10.1002/da.20182 [published Online  
25 First: 2006/05/12]  
26  
27 101. Norman SB, Hami Cissell S, Means-Christensen AJ, et al. Development and  
28 validation of an overall anxiety severity and impairment scale (OASIS).  
29 *Depression and anxiety* 2006;23(4):245-49.  
30  
31 102. Humeniuk R, Ali R, Babor TF, et al. Validation of the Alcohol, Smoking And  
32 Substance Involvement Screening Test (ASSIST). *Addiction*  
33 2008;103(6):1039-47. doi: 10.1111/j.1360-0443.2007.02114.x [published  
34 Online First: 2008/04/01]  
35  
36 103. WHO ASSIST Working Group. The Alcohol, Smoking and Substance  
37 Involvement Screening Test (ASSIST): development, reliability and feasibility.  
38 *Addiction* 2002;97(9):1183-94. [published Online First: 2002/08/30]  
39  
40 104. Newcombe DA, Humeniuk RE, Ali R. Validation of the world health organization  
41 alcohol, smoking and substance involvement screening test (ASSIST): report  
42 of results from the Australian site. *Drug and alcohol review* 2005;24(3):217-  
43 26.  
44  
45 105. Group WAW. The alcohol, smoking and substance involvement screening test  
46 (ASSIST): development, reliability and feasibility. *Addiction* 2002;97(9):1183-  
47 94.  
48  
49 106. Bush K, Kivlahan DR, McDonell MB, et al. The AUDIT alcohol consumption  
50 questions (AUDIT-C): an effective brief screening test for problem drinking.  
51 Ambulatory Care Quality Improvement Project (ACQUIP). Alcohol Use  
52 Disorders Identification Test. *Archives of internal medicine*  
53 1998;158(16):1789-95. [published Online First: 1998/09/17]  
54  
55 107. de Meneses-Gaya C, Zuardi AW, Loureiro SR, et al. Alcohol Use Disorders  
56 Identification Test (AUDIT): An updated systematic review of psychometric  
57 properties. *Psychology & Neuroscience* 2009;2(1):83.  
58  
59 108. Hay PJ, Mond J, Buttner P, et al. Eating disorder behaviors are increasing:  
60 findings from two sequential community surveys in South Australia. *PLoS ONE* 2008;3(2):e1541. doi: 10.1371/journal.pone.0001541 [published Online First: 2008/02/07]  
109. Mitchison D, Hay P, Slewa-Younan S, et al. The changing demographic profile of eating disorder behaviors in the community. *BMC public health*

- 2014;14:943. doi: 10.1186/1471-2458-14-943 [published Online First: 2014/09/13]
110. Berg KC, Peterson CB, Frazier P, et al. Psychometric evaluation of the eating disorder examination and eating disorder examination-questionnaire: A systematic review of the literature. *International Journal of Eating Disorders* 2012;45(3):428-38.
111. Rosenberg M. Rosenberg self-esteem scale (RSE). *Acceptance and commitment therapy Measures package* 1965;61(52):18.
112. Robins RW, Hendin HM, Trzesniewski KH. Measuring global self-esteem: Construct validation of a single-item measure and the Rosenberg Self-Esteem Scale. *Personality and social psychology bulletin* 2001;27(2):151-61.
113. Bagley C, Mallick K. Normative data and mental health construct validity for the Rosenberg Self-Esteem Scale in British Adolescents. *International Journal of Adolescence and Youth* 2001;9(2-3):117-26.
114. Larsen DL, Attkisson CC, Hargreaves WA, et al. Assessment of client/patient satisfaction: development of a general scale. *Evaluation and program planning* 1979;2(3):197-207.
115. Hill NR, Levy JC, Matthews DR. Expansion of the homeostasis model assessment of  $\beta$ -cell function and insulin resistance to enable clinical trial outcome modeling through the interactive adjustment of physiology and treatment effects: iHOMA2. *Diabetes care* 2013;36(8):2324-30.
116. Difrancesco S, Lamers F, Riese H, et al. Sleep, circadian rhythm, and physical activity patterns in depressive and anxiety disorders: A 2-week ambulatory assessment study. *Depression and anxiety* 2019;36(10):975-86.
117. Schaefer CA, Nigg CR, Hill JO, et al. Establishing and evaluating wrist cutpoints for the GENEActiv accelerometer in youth. *Medicine and science in sports and exercise* 2014;46(4):826-33. doi: 10.1249/MSS.000000000000150
118. Hildebrand M, VT VANH, Hansen BH, et al. Age group comparability of raw accelerometer output from wrist- and hip-worn monitors. *Medicine and science in sports and exercise* 2014;46(9):1816-24. doi: 10.1249/MSS.000000000000289
119. Esliger DW, Rowlands AV, Hurst TL, et al. Validation of the GENEActiv Accelerometer. *Medicine and science in sports and exercise* 2011;43(6):1085-93. doi: 10.1249/MSS.0b013e31820513be
120. van Hees VT, Gorzelniak L, Dean Leon EC, et al. Separating movement and gravity components in an acceleration signal and implications for the assessment of human daily physical activity. *PLoS ONE* 2013;8(4):e61691. doi: 10.1371/journal.pone.0061691 [published Online First: 2013/04/30]
121. te Lindert BH, Van Someren EJ. Sleep estimates using microelectromechanical systems (MEMS). *Sleep* 2013;36(5):781-9. doi: 10.5665/sleep.2648
122. van Hees VT, Sabia S, Anderson KN, et al. A Novel, Open Access Method to Assess Sleep Duration Using a Wrist-Worn Accelerometer. *PLoS ONE* 2015;10(11):e0142533. doi: 10.1371/journal.pone.0142533
